# Supplementary material
Source: publisher figshare collection journal article supplement (https://acs.figshare.com/ndownloader/files/18229085)
Supplement: Supplementary file 1 [file 18229085]

## Sheet: Table S1
Table S1: A list of mass spectrometry parameters used for global secretome analysis.
Sr. No.	Title	Information
1	Mass range for MS1	350-1250 m/z
2	Mass resolution setting for MS1	60000
3	Mass window for precursor ion selection	2.0 m/z
4	Number of precursors selected for tandem MS in each scan cycle	20
5	Intensity threshold for MS2	250 counts
6	Charge state screening parameters	reject +1 charge states
7	Normalized collision energy	35
8	Mass analyzer for MS2	Linear ion trap
9	Mass resolution for MS2 (if appropriate)	Low resolution scan
10	Dynamic exclusion settings	Repeat count = 1; Repeat duration (s) = 15.0; Exclusion list = 100; Exclusion duration (s) = 15.0
11	Date of the UniProt Candida glabrata database/Entries in this database	May 12, 2015/5200 entries
12	Common contaminants included in database searches	Yes
13	Precursor and product ion mass tolerances	50 ppm and 1 Da, respectively
14	Enzyme specificity	Trypsin
15	Fixed and variable modifications	Fixed = Cysteine = 57.0215 Da, variable = methionine= 15.9949 Da
16	Integration of search results for 3 gel slices of each sample	Data for three gel slices was combined using the Taplin core software, GFY Core Version 3.7 - Module Search Version 3.3.
17	Shared peptide handling	At Taplin Mass Spectrometry Facility, the shared peptides were handled using the program, Protein Assembler, that organizes the peptides into the most likely protein.
18	FDR calculation	The number of false peptides was divided by the number of total peptides, and the obtained number was multiplied by 2 viz., FDR = [(false peptide numbers/total peptide numbers) X 2].

## Sheet: Table S2
Table S2: A list of mass spectrometry parameters used for quantitative secretome analysis.
Sr. No.	Title	Information
1	Mass range for MS1	150-2000 m/z
2	Mass resolution setting for MS1	70000
3	Mass window for precursor ion selection	2 m/z
4	Intensity threshold for MS2	200
5	Charge state screening parameters	10 most intense peaks with charge state +2 to +5
6	Normalized collision energy	27
7	Mass resolution for MS2	17500
8	Dynamic exclusion settings	12 sec
9	Date of the UniProt Candida glabrata database/ Entries in this database	October, 2017/8078 entries (The downloaded database contained 9826 protein entries and was used for sequence search of raw mass spectrometry files. Proteome Discoverer after processing and indexing of database showed 8078 entries).
10	Common contaminants included in database searches	Yes
11	Handling of shared peptides and missing values	Unique and Razor peptides were used for label-free quantification. Peptide precursor abundance was determined using peptide intensity. Normalization was automatically applied by Proteome Discoverer software using total peptide amount option. Imputation was not selected during Proteome Discoverer Data Processing pipeline.
12	Requirement for a minimum number of peptides per protein	A criterion of a minimum of two peptides per protein was not applied to data analysed by Orbitrap technology.

## Sheet: Table S3
Table S3: A list of 119 proteins identified in the wild-type secretome in global secretome analysis.
	Proteins in red-colored font were common between secretomes of wild-type and Cgyps1-11Δ mutant
	#proteins predicted to be secretory by TargetP1.1 server
	$proteins predicted to be secretory by SignalP5.0 server
	¶proteins predicted to be GPI-anchored by Weig et al. 2004
Sr. No.	Reference	CAGL ID	Cg name	Common/Sc name	MWT(kDa)	Replicate 1		Replicate 2		GPI-anchored proteins¶	Identified in Stead et al.'s study	Identified in Champer et al.'s study	SGD Description	CGD description
						Unique	Total	Unique	Total
1	B4UN36	CAGL0K06033g		TMA7	6.85	3	4	3	7				Protein of unknown that associates with ribosomes; null mutant exhibits translation defects, altered polyribosome profiles, and resistance to the translation inhibitor anisomcyin	Ortholog(s) have role in cytoplasmic translation
2	B4UN40	CAGL0K10906g		RPL36A	11.04	6	17	6	15				N-terminally acetylated protein component of the large (60S) ribosomal subunit, nearly identical to Rpl36Bp and has similarity to rat L36 ribosomal protein; binds to 5.8 S rRNA	Ortholog(s) have RNA binding, structural constituent of ribosome activity, role in cytoplasmic translation and cytosolic large ribosomal subunit localization
3	F2Z613 #$	CAGL0M13849g	GAS2	GAS2	60.36	9	53	7	29	Yes	Yes	Yes	Beta-1,3-glucanosyltransferase, required for cell wall assembly and also has a role in transcriptional silencing; localizes to the cell surface via a glycosylphosphatidylinositol (GPI) anchor; also found at the nuclear periphery	Putative glycoside hydrolase of the Gas/Phr family; predicted GPI-anchor
4	O74683 #$	CAGL0C00363g	KRE9	KRE9	30.53	1	3	1	4			Yes	Glycoprotein involved in cell wall beta-glucan assembly; null mutation leads to severe growth defects, aberrant multibudded morphology, and mating defects	Protein involved in cell wall beta-1,6-glucan synthesis
5	P25400	CAGL0I01408g	CYC1	CYC1	11.54	5	10	4	4				Cytochrome c, isoform 1; electron carrier of the mitochondrial intermembrane space that transfers electrons from ubiquinone-cytochrome c oxidoreductase to cytochrome c oxidase during cellular respiration	Ortholog(s) have electron transfer activity, role in mitochondrial electron transport, cytochrome c to oxygen, mitochondrial electron transport, ubiquinol to cytochrome c and mitochondrial intermembrane space localization
6	P60009	CAGL0K12694g	ACT1	ACT1	41.66	2	6	3	8				Actin, structural protein involved in cell polarization, endocytosis, and other cytoskeletal functions	Actin; protein abundance decreased in ace2 mutant cells
7	Q6FIK0 #$	CAGL0M13805g	MP65	SCW10	38.69	17	360	14	273			Yes	Cell wall protein with similarity to glucanases; may play a role in conjugation during mating based on mutant phenotype and its regulation by Ste12p	65 kDa mannoprotein
8	Q6FIS9	CAGL0M12034g	PYK1	CDC19	54.63	3	4	2	3				Pyruvate kinase, functions as a homotetramer in glycolysis to convert phosphoenolpyruvate to pyruvate, the input for aerobic (TCA cycle) or anaerobic (glucose fermentation) respiration	Pyruvate kinase
9	Q6FIU4	CAGL0M11704g	AHP1	AHP1	18.93	4	6	3	3				Thiol-specific peroxiredoxin, reduces hydroperoxides to protect against oxidative damage; function in vivo requires covalent conjugation to Urm1p	Putative thiol-specific peroxiredoxin; alkyl hydroperoxide reductase; protein differentially expressed in azole resistant strain; expression upregulated in biofilm vs planktonic cell culture; protein abundance decreased in ace2 mutant cells
10	Q6FJ02	CAGL0M10241g		RPL14A	15.24	3	3	2	2				N-terminally acetylated protein component of the large (60S) ribosomal subunit, nearly identical to Rpl14Bp and has similarity to rat L14 ribosomal protein; rpl14a csh5 double null mutant exhibits synthetic slow growth	Ortholog(s) have RNA binding activity, role in macroautophagy and cytosolic large ribosomal subunit localization
11	Q6FJ23 #$	CAGL0M09779g	CTS1	CTS1	54.57	10	163	11	108		Yes	Yes	Endochitinase, required for cell separation after mitosis; transcriptional activation during the G1 phase of the cell cycle is mediated by transcription factor Ace2p	Putative endochitinase with a predicted role in cell separation
12	Q6FJ68 #$	CAGL0M08756g		EXG2	65.02	18	33	12	26	Yes	Yes		Exo-1,3-beta-glucanase, involved in cell wall beta-glucan assembly; may be anchored to the plasma membrane via a glycosylphosphatidylinositol (GPI) anchor	Putative exo-1,3-beta-glucanase; predicted GPI-anchor
13	Q6FJ79 #$	CAGL0M08514g	PIR5	PIR3	21.92	8	333	9	483		Yes	Yes	O-glycosylated covalently-bound cell wall protein required for cell wall stability; expression is cell cycle regulated, peaking in M/G1 and also subject to regulation by the cell integrity pathway	Pir protein family member, putative cell wall component
14	Q6FJ80 #$	CAGL0M08492g	PIR3	PIR1	34.06	8	154	6	60		Yes	Yes	O-glycosylated protein required for cell wall stability; attached to the cell wall via beta-1,3-glucan; mediates mitochondrial translocation of Apn1p; expression regulated by the cell integrity pathway and by Swi5p during the cell cycle	Pir protein family member, putative cell wall component
15	Q6FJ92 #$	CAGL0M08206g		TOH1	43.56	9	15	10	18				GPI-anchored cell wall protein of unknown function; induced in response to cell wall damaging agents and by mutations in genes involved in cell wall biogenesis; sequence similarity to YBR162C/TOS1, a covalently bound cell wall protein	Protein of unknown function
16	Q6FJD5	CAGL0M07161g	EGD2	EGD2	17.88	3	3	2	2				Alpha subunit of the heteromeric nascent polypeptide-associated complex (NAC) involved in protein sorting and translocation, associated with cytoplasmic ribosomes	Alpha subunit of the nascent polypeptide-associated complex; protein abundance decreased in ace2 mutant cells
17	Q6FJK5 #$	CAGL0M05599g		TOS1	47.08	12	270	10	169			Yes	Covalently-bound cell wall protein of unknown function; identified as a cell cycle regulated SBF target gene; deletion mutants are highly resistant to treatment with beta-1,3-glucanase; has sequence similarity to YJL171C	Ortholog(s) have cell surface, extracellular region, hyphal cell wall localization
18	Q6FJM7 #$	CAGL0M05049g		DFG5	49.42	3	4	2	2	Yes			Putative mannosidase, essential glycosylphosphatidylinositol (GPI)-anchored membrane protein required for cell wall biogenesis in bud formation, involved in filamentous growth, homologous to Dcw1p	Putative glycoside hydrolase; predicted GPI-anchor
19	Q6FJN0	CAGL0M04983g		MBF1	16.35	5	8	3	6				Transcriptional coactivator that bridges the DNA-binding region of Gcn4p and TATA-binding protein Spt15p; suppressor of frameshift mutations	Has domain(s) with predicted DNA binding, sequence-specific DNA binding activity
20	Q6FJP9	CAGL0M04543g			32.64	1	2	2	7					Protein of unknown function
21	Q6FJR5 $	CAGL0M04191g	YPS1	YPS1	63.75	6	27	8	27	Yes		Yes	Aspartic protease, member of the yapsin family of proteases involved in cell wall growth and maintenance; attached to the plasma membrane via a glycosylphosphatidylinositol (GPI) anchor	Yapsin family aspartic protease; predicted GPI-anchor; complements cell wall defect phenotypes of S. cerevisiae yps1 mutant; regulation of pH homeostasis under acid conditions; induced by high temperature, Slt1- and Crz1p-dependent
22	Q6FJU2 #$	CAGL0M03597g	MID1	MID1	65.73	4	5	5	6				N-glycosylated integral membrane protein of the ER membrane and plasma membrane, functions as a stretch-activated Ca2+-permeable cation channel required for Ca2+ influx stimulated by pheromone; interacts with Cch1p; forms an oligomer	Putative calcium transporter; putative regulatory subunit of a plasma membrane gated channel involved in Ca2+ uptake; required for viability upon prolonged fluconazole stress
23	Q6FK20 #$	CAGL0M01826g	ECM33	ECM33	43.04	6	57	6	54	Yes	Yes	Yes	GPI-anchored protein of unknown function, has a possible role in apical bud growth; GPI-anchoring on the plasma membrane crucial to function; phosphorylated in mitochondria; similar to Sps2p and Pst1p	Ecm33-family protein with a predicted role in cell wall biogenesis and organization; predicted GPI-anchor
24	Q6FKE8	CAGL0L12144g		RAX2	127.49	6	8	2	3				N-glycosylated protein involved in the maintenance of bud site selection during bipolar budding; localization requires Rax1p; RAX2 mRNA stability is regulated by Mpt5p	Ortholog(s) have role in actin filament bundle organization, cellular bud site selection, hyphal growth, positive regulation of establishment of bipolar cell polarity regulating cell shape
25	Q6FKV7 #$	CAGL0L08294g		AXL2	91.94	9	13	9	15				Integral plasma membrane protein required for axial budding in haploid cells, localizes to the incipient bud site and bud neck; glycosylated by Pmt4p; potential Cdc28p substrate	Ortholog(s) have role in axial cellular bud site selection and cellular bud neck septin ring, incipient cellular bud site, integral component of plasma membrane localization
26	Q6FKY1	CAGL0L07722g	PGK1	PGK1	44.59	5	6	3	3				3-phosphoglycerate kinase, catalyzes transfer of high-energy phosphoryl groups from the acyl phosphate of 1,3-bisphosphoglycerate to ADP to produce ATP; key enzyme in glycolysis and gluconeogenesis	Putative 3-phosphoglycerate kinase; protein differentially expressed in azole resistant strain; protein abundance increased in ace2 mutant cells
27	Q6FL83 #$	CAGL0L05434g	SUN4	NCA3	36.16	12	51	16	109				Protein that functions with Nca2p to regulate mitochondrial expression of subunits 6 (Atp6p) and 8 (Atp8p ) of the Fo-F1 ATP synthase; member of the SUN family; expression induced in cells treated with the mycotoxin patulin	Ortholog(s) have role in fungal-type cell wall organization or biogenesis, mitochondrion organization and fungal-type cell wall localization
28	Q6FLH9 #$	CAGL0L03289g		UTH1	37.8	11	247	11	152		Yes	Yes	Mitochondrial outer membrane and cell wall localized SUN family member involved in cell wall biogenesis and required for mitochondrial autophagy; involved in the oxidative stress response, life span during starvation, and cell death	Ortholog(s) have role in autophagy of mitochondrion, fungal-type cell wall biogenesis, fungal-type cell wall organization
29	Q6FLP9 #$	CAGL0L01727g		DCW1	49.67	3	4	3	5	Yes			Putative mannosidase, GPI-anchored membrane protein required for cell wall biosynthesis in bud formation;homologous to Dfg5p	Putative glycoside hydrolase; predicted GPI-anchor
30	Q6FM13	CAGL0K11858g		PST2	20.96	5	6	3	3				Protein with similarity to members of a family of flavodoxin-like proteins; induced by oxidative stress in a Yap1p dependent manner; the authentic, non-tagged protein is detected in highly purified mitochondria in high-throughput studies	Putative flavodoxin
31	Q6FM73	CAGL0K10384g		FAB1	241.71	4	9	7	12				1-phosphatidylinositol-3-phosphate 5-kinase; vacuolar membrane kinase that generates phosphatidylinositol (3,5)P2, which is involved in vacuolar sorting and homeostasis	Ortholog(s) have 1-phosphatidylinositol-3-phosphate 5-kinase activity, phosphatidylinositol-3-phosphate binding activity
32	Q6FMI3	CAGL0D01188g	TEF1	TEF1	49.82	2	2	3	3				Translational elongation factor EF-1 alpha; also encoded by TEF2; functions in the binding reaction of aminoacyl-tRNA (AA-tRNA) to ribosomes; may also have a role in tRNA re-export from the nucleus	Translation elongation factor eEF1 alpha-A chain
33	Q6FMJ5 #	CAGL0K07546g	PMU2	PMU1	37.46	8	10	5	5				Putative phosphomutase; contains a region homologous to the active site of phosphomutases; overexpression suppresses the histidine auxotrophy of an ade3 ade16 ade17 triple mutant and the temperature sensitivity of a tps2 mutant	Putative phosphate starvation inducible acid phosphatase; contains a phosphomutase-like domain; functionally complements a S. cerevisiae pho5 mutant; transcript abundance during phosphate starvation regulated by Pho4p
34	Q6FMQ4	CAGL0K06149g		RPS17B	15.8	2	4	2	3				Ribosomal protein 51 (rp51) of the small (40s) subunit; nearly identical to Rps17Ap and has similarity to rat S17 ribosomal protein	Ortholog(s) have role in ribosomal small subunit assembly
35	Q6FMU4	CAGL0K05137g		ATH1	136.48	7	7	14	16				Acid trehalase required for utilization of extracellular trehalose	Ortholog(s) have alpha,alpha-trehalase activity and role in cellular response to desiccation, cellular response to ethanol, cellular response to freezing, pathogenesis, trehalose catabolic process
36	Q6FMZ0	CAGL0K04125g		ACB1	10.09	8	10	2	4				Acyl-CoA-binding protein, transports newly synthesized acyl-CoA esters from fatty acid synthetase (Fas1p-Fas2p) to acyl-CoA-consuming processes; subject to starvation-induced, Grh1p-mediated unconventional secretion	Ortholog(s) have long-chain fatty acyl-CoA binding activity, role in chronological cell aging, very long-chain fatty acid biosynthetic process and extracellular region, nucleus localization
37	Q6FNB1 #$	CAGL0K01353g		NPC2	20.1	2	2	1	2				Functional homolog of human NPC2/He1, which is a cholesterol-binding protein whose deficiency causes Niemann-Pick type C2 disease involving retention of cholesterol in lysosomes	Ortholog(s) have role in intracellular sterol transport and extracellular region, fungal-type vacuole lumen localization
38	Q6FND5	CAGL0K00803g	TRX2	TRX1	11.16	11	36	8	20		Yes	Yes	Cytoplasmic thioredoxin isoenzyme of the thioredoxin system which protects cells against oxidative and reductive stress, forms LMA1 complex with Pbi2p, acts as a cofactor for Tsa1p, required for ER-Golgi transport and vacuole inheritance	Protein described as thioredoxin involved in oxidative stress response; expression upregulated in biofilm vs planktonic cell culture
39	Q6FNQ3 #$	CAGL0J09922g		SUN4	44.07	12	431	11	304		Yes	Yes	Cell wall protein related to glucanases, possibly involved in cell wall septation; member of the SUN family	Ortholog(s) have glucan endo-1,3-beta-D-glucosidase activity
40	Q6FNU0	CAGL0J09086g		RPL35B	14.11	4	5	4	4				Protein component of the large (60S) ribosomal subunit, identical to Rpl35Ap and has similarity to rat L35 ribosomal protein	Ortholog(s) have role in maturation of LSU-rRNA from tricistronic rRNA transcript (SSU-rRNA, 5.8S rRNA, LSU-rRNA) and cytosolic large ribosomal subunit, preribosome, large subunit precursor localization
41	Q6FP75 #$	CAGL0J06050g		YGP1	37.78	13	487	15	333		Yes	Yes	Cell wall-related secretory glycoprotein; induced by nutrient deprivation-associated growth arrest and upon entry into stationary phase; may be involved in adaptation prior to stationary phase entry; has similarity to Sps100p	Ortholog(s) have role in cell wall assembly and extracellular region localization
42	Q6FPE4 #$	CAGL0J04466g		PUN1	29.29	5	6	5	6				Plasma membrane protein with a role in cell wall integrity; co-localizes with Sur7p in punctate membrane patches; null mutant displays decreased thermotolerance; transcription induced upon cell wall damage and metal ion stress	Ortholog(s) have role in fungal-type cell wall organization, protein complex oligomerization and cell cortex of cell tip, membrane raft, plasma membrane localization
43	Q6FPJ9	CAGL0J03234g		RPS24A	15.34	5	5	4	5				Protein component of the small (40S) ribosomal subunit; identical to Rps24Bp and has similarity to rat S24 ribosomal protein	Ortholog(s) have role in maturation of SSU-rRNA from tricistronic rRNA transcript (SSU-rRNA, 5.8S rRNA, LSU-rRNA)
44	Q6FPR9 #$	CAGL0J01463g	CWP1.3	CWP1	25.5	6	27	3	9	Yes			Cell wall mannoprotein that localizes to birth scars of daughter cells; linked to a beta-1,3- and beta-1,6-glucan heteropolymer through a phosphodiester bond; required for propionic acid resistance	Putative GPI-linked cell wall protein
45	Q6FPW3	CAGL0J00451g		TDH3	35.9	2	6	2	2				Glyceraldehyde-3-phosphate dehydrogenase (GAPDH), isozyme 3; involved in glycolysis and gluconeogenesis; tetramer that catalyzes the reaction of glyceraldehyde-3-phosphate to 1,3 bis-phosphoglycerate; detected in the cytoplasm and cell wall; GAPDH-derived antimicrobial peptides secreted by S. cerevisiae are active against a wide variety of wine-related yeasts and bacteria; binds AU-rich RNA	Putative glyceraldehyde-3-phosphate dehydrogenase; protein differentially expressed in azole resistant strain; expression downregulated in biofilm vs planktonic cell culture
46	Q6FQ39	CAGL0I09394g		SDH8	15.21	2	2	2	2				Putative protein of unknown function; the authentic, non-tagged protein is detected in highly purified mitochondria in high-throughput studies	Ortholog(s) have protein binding involved in protein folding activity, role in mitochondrial respiratory chain complex II assembly and mitochondrial matrix localization
47	Q6FQA4	CAGL0I07843g	ADH1	ADH1	37.52	6	10	2	2				Alcohol dehydrogenase, fermentative isozyme active as homo- or heterotetramers; required for the reduction of acetaldehyde to ethanol, the last step in the glycolytic pathway	Putative alcohol dehydrogenase isoenzyme III; increased protein abundance in azole resistant strain
48	Q6FQH4 #$	CAGL0I06204g	PIR1	PIR5	35.74	3	3	4	4		Yes		Putative protein of unknown function; member of the PIR (proteins with internal repeats) family of cell wall proteins; non-essential gene that is required for sporulation; mRNA is weakly cell cycle regulated, peaking in mitosis	Pir protein family member, putative cell wall component
49	Q6FQH5 #$	CAGL0I06182g	PIR2	HSP150	34.6	7	168	5	100		Yes	Yes	O-mannosylated heat shock protein that is secreted and covalently attached to the cell wall via beta-1,3-glucan and disulfide bridges; required for cell wall stability; induced by heat shock, oxidative stress, and nitrogen limitation	Pir protein family member, putative cell wall component
50	Q6FQH6 #$	CAGL0I06160g	PIR4	CIS3	23.83	9	363	7	138		Yes	Yes	Mannose-containing glycoprotein constituent of the cell wall; member of the PIR (proteins with internal repeats) family	Pir protein family member, putative cell wall component
51	Q6FQV8	CAGL0I03168g		YEL023C	71.54	1	2	1	2				Putative protein of unknown function; expression is increased greatly during sporulation; YEL023C is not an essential gene	Ortholog of S. cerevisiae : YEL023C, C. albicans SC5314 : C3_04440C_A, C. dubliniensis CD36 : Cd36_84380, Candida tenuis NRRL Y-1498 : CANTEDRAFT_101635 and Pichia stipitis Pignal : PICST_19384
52	Q6FQY4	CAGL0I02486g	ENO1	ENO2	46.71	12	25	6	11				Enolase II, a phosphopyruvate hydratase that catalyzes the conversion of 2-phosphoglycerate to phosphoenolpyruvate during glycolysis and the reverse reaction during gluconeogenesis; expression is induced in response to glucose	Putative enolase I; protein abundance increased in azole resistant strain and in ace2 mutant cells
53	Q6FR70 #$	CAGL0I00484g		EXG1	51.13	29	105	30	214			Yes	Major exo-1,3-beta-glucanase of the cell wall, involved in cell wall beta-glucan assembly; exists as three differentially glycosylated isoenzymes	Ortholog(s) have cell adhesion molecule binding, glucan endo-1,6-beta-glucosidase activity, glucan exo-1,3-beta-glucosidase activity
54	Q6FRG6	CAGL0H08734g		RPL43A	10.1	2	2	2	3				Protein component of the large (60S) ribosomal subunit, identical to Rpl43Bp and has similarity to rat L37a ribosomal protein; null mutation confers a dominant lethal phenotype	Ortholog(s) have cytosolic large ribosomal subunit localization
55	Q6FRT3	CAGL0H06127g		TIM9	10.12	2	3	2	3				Essential protein of the mitochondrial intermembrane space, forms a complex with Tim10p (TIM10 complex) that delivers hydrophobic proteins to the TIM22 complex for insertion into the inner membrane	Ortholog(s) have protein transporter activity, role in protein import into mitochondrial outer membrane, regulation of growth rate and mitochondrial intermembrane space protein transporter complex localization
56	Q6FS03	CAGL0H04521g		RPL32	14.77	4	4	3	3				Protein component of the large (60S) ribosomal subunit, has similarity to rat L32 ribosomal protein; overexpression disrupts telomeric silencing	Ortholog(s) have structural constituent of ribosome activity, role in translation and cytosolic large ribosomal subunit localization
57	Q6FSC9 #$	CAGL0H01529g	CPR5	CPR5	22.6	7	10	3	3				Peptidyl-prolyl cis-trans isomerase (cyclophilin) of the endoplasmic reticulum, catalyzes the cis-trans isomerization of peptide bonds N-terminal to proline residues; transcriptionally induced in response to unfolded proteins in the ER	Peptidyl-prolyl cis-trans isomerase; expression upregulated in biofilm vs planktonic cell culture
58	Q6FSL2	CAGL0G09713g		RPS30B	7.09	2	4	2	3				Protein component of the small (40S) ribosomal subunit; nearly identical to Rps30Ap and has similarity to rat S30 ribosomal protein	Has domain(s) with predicted structural constituent of ribosome activity, role in translation and ribosome localization
59	Q6FSM1 #$	CAGL0G09515g		SPR1	48.61	18	88	20	127			Yes	Sporulation-specific exo-1,3-beta-glucanase; contributes to ascospore thermoresistance	Ortholog(s) have glucan exo-1,3-beta-glucosidase activity, role in ascospore formation and ascospore wall localization
60	Q6FSM3 #$	CAGL0G09449g	CRH1	CRH1	47.95	26	1454	29	1317	Yes	Yes	Yes	Chitin transglycosylase that functions in the transfer of chitin to beta(1-6) and beta(1-3) glucans in the cell wall; similar and functionally redundant to Utr2; localizes to sites of polarized growth; expression induced by cell wall stress	Putative glycoside hydrolase; predicted GPI-anchor
61	Q6FSM4	CAGL0G09383g	TDH3	TDH3	35.87	16	22	11	15				Glyceraldehyde-3-phosphate dehydrogenase, isozyme 3, involved in glycolysis and gluconeogenesis; tetramer that catalyzes the reaction of glyceraldehyde-3-phosphate to 1,3 bis-phosphoglycerate; detected in the cytoplasm and cell wall	Putative glyceraldehyde-3-phosphate dehydrogenase; increased protein abundance in azole resistant strain; expression upregulated in biofilm vs planktonic cell culture; upregulated in hypoxia
62	Q6FSQ5 #$	CAGL0G08668g		SIM1	49.2	3	14	2	11		Yes		Protein of the SUN family (Sim1p, Uth1p, Nca3p, Sun4p) that may participate in DNA replication, promoter contains SCB regulation box at -300 bp indicating that expression may be cell cycle-regulated	Ortholog(s) have role in fungal-type cell wall organization and fungal-type cell wall localization
63	Q6FSR7	CAGL0G08360g	VPS34	VPS34	102.51	8	10	11	19				Phosphatidylinositol 3-kinase responsible for the synthesis of phosphatidylinositol 3-phosphate; forms membrane-associated signal transduction complex with Vps15p to regulate protein sorting; activated by the GTP-bound form of Gpa1p	Putative phosphoinositide 3-kinase involved in iron homeostasis
64	Q6FSS6	CAGL0G08173g		RPS31	17.12	2	3	2	2				Fusion protein that is cleaved to yield a ribosomal protein of the small (40S) subunit and ubiquitin; ubiquitin may facilitate assembly of the ribosomal protein into ribosomes; interacts genetically with translation factor eIF2B	Ortholog(s) have protein tag, structural constituent of ribosome activity and role in maturation of SSU-rRNA from tricistronic rRNA transcript (SSU-rRNA, LSU-rRNA,5S), protein ubiquitination, ribosomal small subunit assembly
65	Q6FST9 #$	CAGL0G07887g		VOA1	27.81	12	99	11	56			Yes	Endoplasmic reticulum protein that functions, together with other assembly factors, in assembly of the V0 sector of the vacuolar ATPase (V-ATPase); null mutation enhances the V-ATPase deficiency of a vma21 mutant impaired in ER retrieval	Ortholog(s) have role in cell separation after cytokinesis, cellular protein-containing complex assembly, endocytosis, fungal-type cell wall organization, hyphal growth, vacuole organization
66	Q6FSU9 #$	CAGL0G07667g		PRY1	27.04	5	40	5	45		Yes	Yes	Protein of unknown function	Ortholog(s) have cholesterol binding, magnesium ion binding activity, role in sterol transport and extracellular region localization
67	Q6FTC5	CAGL0G03575g		RPL23B	14.47	4	7	4	5				Protein component of the large (60S) ribosomal subunit, identical to Rpl23Ap and has similarity to E. coli L14 and rat L23 ribosomal proteins	Has domain(s) with predicted structural constituent of ribosome activity, role in translation and ribosome localization; evidence for a extended second exon by 2 amino acids
68	Q6FTD8	CAGL0G03289g	SSA3	SSA4	69.81	2	3	1	2				Heat shock protein that is highly induced upon stress; plays a role in SRP-dependent cotranslational protein-membrane targeting and translocation; member of the HSP70 family; cytoplasmic protein that concentrates in nuclei upon starvation	Heat shock protein of the HSP70 family
69	Q6FTH4	CAGL0G02475g		RPL40B	14.56	6	41	6	15				Fusion protein, identical to Rpl40Ap, that is cleaved to yield ubiquitin and a ribosomal protein of the large (60S) ribosomal subunit with similarity to rat L40; ubiquitin may facilitate assembly of the ribosomal protein into ribosomes	Ortholog(s) have role in protein ubiquitination, ribosomal large subunit assembly, ribosomal large subunit export from nucleus and cytosolic large ribosomal subunit localization
70	Q6FTP4	CAGL0G00902g		NUP2	78.44	4	5	2	2				Nucleoporin involved in nucleocytoplasmic transport, binds to either the nucleoplasmic or cytoplasmic faces of the nuclear pore complex depending on Ran-GTP levels; also has a role in chromatin organization	Ortholog(s) have Ran GTPase binding, structural constituent of nuclear pore activity
71	Q6FTR6 #$	CAGL0G00308g	SCW4	SCW4	39.42	19	536	19	589		Yes	Yes	Cell wall protein with similarity to glucanases; scw4 scw10 double mutants exhibit defects in mating	Putative transglycosidase with a predicted role in the modification of 1,3-beta-glucan
72	Q6FTR7 #$	CAGL0G00286g	GAS1	GAS1	59.9	10	69	11	40	Yes	Yes	Yes	Beta-1,3-glucanosyltransferase; required for cell wall assembly and also has a role in transcriptional silencing; localizes to cell surface via a glycosylphosphatidylinositol (GPI) anchor; also found at nuclear periphery; genetic interactions with histone H3 lysine acetyltransferases GCN5 and SAS3 indicate previously unsuspected functions for Gas1 in DNA damage response and cell cycle regulation	Putative glycoside hydrolase of the Gas/Phr family; predicted GPI-anchor
73	Q6FTS0 #$	CAGL0G00220g		BGL2	33.67	17	604	17	444			Yes	Endo-beta-1,3-glucanase, major protein of the cell wall, involved in cell wall maintenance	Ortholog(s) have 1,3-beta-glucanosyltransferase activity, glucan endo-1,3-beta-D-glucosidase activity
74	Q6FTU1 #$	CAGL0F08833g		MSB2	98.28	7	150	8	166			Yes	Mucin family member involved in the Cdc42p- and MAP kinase-dependent filamentous growth signaling pathway; also functions as an osmosensor in parallel to the Sho1p-mediated pathway; potential Cdc28p substrate	Putative adhesin-like protein
75	Q6FTZ6 #$	CAGL0F07601g	CWP1.1	CWP2	21.33	11	1364	11	1101	Yes	Yes		Covalently linked cell wall mannoprotein, major constituent of the cell wall; plays a role in stabilizing the cell wall; involved in low pH resistance; precursor is GPI-anchored	GPI-linked cell wall protein
76	Q6FTZ7 #$	CAGL0F07579g	CWP1.2	CWP1	20.71	2	52	2	38	Yes	Yes	Yes	Cell wall mannoprotein that localizes specifically to birth scars of daughter cells, linked to a beta-1,3- and beta-1,6-glucan heteropolymer through a phosphodiester bond; required for propionic acid resistance	Putative GPI-linked cell wall protein
77	Q6FUA0 #	CAGL0F05115g		INA1	75.13	9	12	6	8				Putative protein of unknown function; YLR413W is not an essential gene	Ortholog(s) have plasma membrane localization
78	Q6FUF5 #$	CAGL0F03883g	GAS4	GAS3	57.01	17	76	14	60	Yes	Yes	Yes	Low abundance, possibly inactive member of the GAS family of GPI-containing proteins; putative 1,3-beta-glucanosyltransferase with similarity to other GAS family members; localizes to the cell wall; mRNA induced during sporulation	Putative glycoside hydrolase of the Gas/Phr family; predicted GPI-anchor
79	Q6FUJ4 #$	CAGL0F03003g		HKR1	125.45	3	4	4	6				Mucin family member that functions as an osmosensor in the Sho1p-mediated HOG pathway with Msb2p; proposed to be a negative regulator of filamentous growth; mutant displays defects in beta-1,3 glucan synthesis and bud site selection	Ortholog(s) have osmosensor activity and role in (1->3)-beta-D-glucan biosynthetic process, cellular bud site selection, fungal-type cell wall organization, hyperosmotic response, osmosensory signaling pathway via Sho1 osmosensor
80	Q6FUQ9 #$	CAGL0F01463g	TIR1	TIR2	21.45	1	6	1	6	Yes			Putative cell wall mannoprotein of the Srp1p/Tip1p family of serine-alanine-rich proteins; transcription is induced by cold shock and anaerobiosis	Putative GPI-linked cell wall mannoprotein of the Srp1p/Tip1p family
81	Q6FUR4 #$	CAGL0F01287g	GAS5	GAS5	51.83	11	69	12	66		Yes	Yes	1,3-beta-glucanosyltransferase, has similarity to Gas1p; localizes to the cell wall	Putative transglycosidase with a predicted role in the elongation of 1,3-beta-glucan
82	Q6FV53 #$	CAGL0E04664g		EMC10	22.67	2	4	2	2				Putative protein of unknown function; green fluorescent protein (GFP)-fusion protein localizes to the endoplasmic reticulum; YDR056C is not an essential protein	Ortholog of S. cerevisiae : EMC10 and Saccharomyces cerevisiae S288C : YDR056C
83	Q6FV55 #$	CAGL0E04620g	PST1	PST1	44.02	10	59	8	34	Yes	Yes	Yes	Cell wall protein that contains a putative GPI-attachment site; secreted by regenerating protoplasts; up-regulated by activation of the cell integrity pathway, as mediated by Rlm1p; upregulated by cell wall damage via disruption of FKS1	Ecm33-family protein with a predicted role in cell wall biogenesis and organization; predicted GPI-anchor
84	Q6FVC8 #$	CAGL0E02915g		SCW11	52.89	7	26	6	11				Cell wall protein with similarity to glucanases; may play a role in conjugation during mating based on its regulation by Ste12p	Putative adhesin-like protein
85	Q6FVF6	CAGL0E02255g		ZEO1	13.76	6	8	4	6				Peripheral membrane protein of the plasma membrane that interacts with Mid2p; regulates the cell integrity pathway mediated by Pkc1p and Slt2p; the authentic protein is detected in a phosphorylated state in highly purified mitochondria	Ortholog(s) have role in fungal-type cell wall organization and extrinsic component of plasma membrane localization
86	Q6FVG8	CAGL0E01991g		RPS19A	15.84	5	7	3	4				Protein component of the small (40S) ribosomal subunit, required for assembly and maturation of pre-40 S particles; mutations in human RPS19 are associated with Diamond Blackfan anemia; nearly identical to Rps19Bp	Ortholog(s) have structural constituent of ribosome activity, role in rRNA export from nucleus, ribosomal small subunit biogenesis and cytosolic small ribosomal subunit localization
87	Q6FVH3	CAGL0E01881g	YPS11	YPS1	55.52	10	23	10	25					Putative aspartic protease; member of a YPS gene cluster that is required for virulence in mice; induced in response to low pH and high temperature
88	Q6FVH4 #$	CAGL0E01859g	YPS10	YPS1	55.3	5	16	6	17	Yes			Putative GPI-anchored aspartic protease, member of the yapsin family of proteases involved in cell wall growth and maintenance	Putative aspartic protease; predicted GPI-anchor; member of a YPS gene cluster that is required for virulence in mice; induced in response to low pH and high temperature
89	Q6FVH5 #$	CAGL0E01837g	YPS9	MKC7	56.83	16	112	17	92	Yes	Yes		Aspartic protease, member of the yapsin family of proteases involved in cell wall growth and maintenance; attached to the plasma membrane via a glycosylphosphatidylinositol (GPI) anchor	Putative aspartic protease; predicted GPI-anchor; member of a YPS gene cluster that is required for virulence in mice; expression induced at high temperature
90	Q6FVH7 #$	CAGL0E01793g	YPS6	YPS1	55.91	10	90	9	53	Yes	Yes	Yes		Putative aspartic protease; predicted GPI-anchor; member of a YPS gene cluster that is required for virulence in mice; expression induced at high temperature
91	Q6FVH8 #$	CAGL0E01771g	YPS5	YPS1	57.21	9	23	6	13	Yes			Protein with similarity to GPI-anchored aspartic proteases such as Yap1p and Yap3p	Putative aspartic protease; predicted GPI-anchor; member of a YPS gene cluster that is required for virulence in mice; gene is downregulated in azole-resistant strain
92	Q6FVI0 #$	CAGL0E01727g	YPS3	YPS1	58.87	5	14	3	6	Yes	Yes			Putative aspartic protease; predicted GPI-anchor; member of a YPS gene cluster that is required for virulence in mice
93	Q6FVL9	CAGL0E00869g		STM1	29.79	10	19	6	11				Protein required for optimal translation under nutrient stress; perturbs association of Yef3p with ribosomes; involved in TOR signaling; binds G4 quadruplex and purine motif triplex nucleic acid; helps maintain telomere structure	Protein of unknown function
94	Q6FVV8	CAGL0D05214g		RPL29	6.74	1	6	1	5				Protein component of the large (60S) ribosomal subunit, has similarity to rat L29 ribosomal protein; not essential for translation, but required for proper joining of the large and small ribosomal subunits and for normal translation rate	Ortholog(s) have structural constituent of ribosome activity, role in cytoplasmic translation and cytosolic large ribosomal subunit localization
95	Q6FW27	CAGL0D03498g		YKT6	23.16	5	6	6	6				Vesicle membrane protein (v-SNARE) with acyltransferase activity; involved in trafficking to and within the Golgi, endocytic trafficking to the vacuole, and vacuolar fusion; membrane localization due to prenylation at the carboxy-terminus	Ortholog(s) have SNAP receptor activity, palmitoyltransferase activity
96	Q6FW50 #$	CAGL0D02948g	KAR2	KAR2	73.28	3	4	3	4		Yes		ATPase involved in protein import into the ER, also acts as a chaperone to mediate protein folding in the ER and may play a role in ER export of soluble proteins; regulates the unfolded protein response via interaction with Ire1p	Protein with a predicted role in nuclear fusion
97	Q6FW69 #$	CAGL0D02530g	EGT2	EGT2	72.8	11	127	12	152	Yes	Yes	Yes	Glycosylphosphatidylinositol (GPI)-anchored cell wall endoglucanase required for proper cell separation after cytokinesis, expression is activated by Swi5p and tightly regulated in a cell cycle-dependent manner	Putative endoglucanase; glycoside hydrolase; predicted GPI-anchor
98	Q6FWE3	CAGL0D00858g		RPS29B	6.72	1	8	1	5				Protein component of the small (40S) ribosomal subunit; nearly identical to Rps29Ap and has similarity to rat S29 and E. coli S14 ribosomal proteins	Ortholog(s) have structural constituent of ribosome activity and cytosolic small ribosomal subunit localization
99	Q6FWL5	CAGL0C04741g	SOD1	SOD1	15.74	6	8	4	6				Cytosolic copper-zinc superoxide dismutase; some mutations are analogous to those that cause ALS (amyotrophic lateral sclerosis) in humans	Cytosolic copper-zinc superoxide dismutase
100	Q6FWM8	CAGL0C04389g		HTB2	13.99	3	7	3	7				Histone H2B, core histone protein required for chromatin assembly and chromosome function; nearly identical to HTB1; Rad6p-Bre1p-Lge1p mediated ubiquitination regulates transcriptional activation, meiotic DSB formation and H3 methylation	Ortholog(s) have replication fork protection complex, site of double-strand break localization
101	Q6FWW0	CAGL0C02475g		CHZ1	16.22	3	5	3	5				Histone chaperone for Htz1p/H2A-H2B dimer; required for the stabilization of the Chz1p-Htz1-H2B complex; has overlapping function with Nap1p; null mutant displays weak sensitivity to MMS and benomyl; contains a highly conserved CHZ motif	Ortholog(s) have histone binding activity, role in chromatin remodeling and nucleus localization
102	Q6FWW1	CAGL0C02453g		YPT31	23.93	2	2	2	2				Rab family GTPase, very similar to Ypt32p; involved in the exocytic pathway; mediates intra-Golgi traffic or the budding of post-Golgi vesicles from the trans-Golgi	Ortholog(s) have GTPase activity
103	Q6FWX2 #$	CAGL0C02211g	UTR2	UTR2	52.41	6	92	9	74	Yes			Chitin transglycosylase that functions in the transfer of chitin to beta(1-6) and beta(1-3) glucans in the cell wall; similar to and functionally redundant with Crh1; glycosylphosphatidylinositol (GPI)-anchored protein localized to bud neck	Putative glycoside hydrolase of the Crh family; predicted GPI-anchor
104	Q6FX55 #$	CAGL0C00110g	EPA6	FLO1	77.73	4	11	2	2	Yes			Lectin-like protein involved in flocculation, cell wall protein that binds to mannose chains on the surface of other cells, confers floc-forming ability that is chymotrypsin sensitive and heat resistant; similar to Flo5p	Sub-telomerically encoded adhesin with a role in cell adhesion; binds to ligands containing a terminal galactose residue; expressed during murine urinary tract infection, biofilm-upregulated; belongs to adhesin cluster I
105	Q6FX79	CAGL0B01100g		TFS1	23.01	4	4	4	4				Protein that interacts with and inhibits carboxypeptidase Y and Ira2p; phosphatidylethanolamine-binding protein (PEBP) family member; targets to vacuolar membranes during stationary phase; acetylated by NatB N-terminal acetyltransferase	Phosphatidylethanolamine-binding protein
106	Q6FXU5	CAGL0A00495g	PMA1	PMA1	98.31	19	24	9	10				Plasma membrane H+-ATPase, pumps protons out of the cell; major regulator of cytoplasmic pH and plasma membrane potential; P2-type ATPase; Hsp30p plays a role in Pma1p regulation; interactions with Std1p appear to propagate [GAR+]	Putative plasma membrane proton pump with a predicted role in pH homeostasis
107	Q6FXW9	CAGL0A00979g		RPL38	8.99	6	19	4	16				Protein component of the large (60S) ribosomal subunit, has similarity to rat L38 ribosomal protein	Ortholog(s) have cytosolic large ribosomal subunit, hyphal cell wall, yeast-form cell wall localization
108	Q6FXZ0	CAGL0A01540g		RPL30	11.36	4	4	4	4				Protein component of the large (60S) ribosomal subunit, has similarity to rat L30 ribosomal protein; involved in pre-rRNA processing in the nucleolus; autoregulates splicing of its transcript	Ortholog(s) have pre-mRNA 5'-splice site binding, structural constituent of ribosome activity, role in negative regulation of mRNA splicing, via spliceosome, rRNA processing and cytosolic large ribosomal subunit localization
109	Q6FXZ1 #$	CAGL0A01474g		SCW11	62.42	8	29	7	23			Yes	Cell wall protein with similarity to glucanases; may play a role in conjugation during mating based on its regulation by Ste12p	Ortholog(s) have cell surface, extracellular region, fungal-type cell wall localization
110	Q6FY13 #$	CAGL0A01870g		PEP1	85.56	10	13	7	8				Type I transmembrane sorting receptor for multiple vacuolar hydrolases; cycles between the late-Golgi and prevacuolar endosome-like compartments	Has domain(s) with predicted integral component of membrane localization
111	Q6FY32 #$	CAGL0A02431g	YPS7	YPS7	63.36	16	45	17	31	Yes			Putative GPI-anchored aspartic protease, member of the yapsin family of proteases involved in cell wall growth and maintenance; located in the cytoplasm and endoplasmic reticulum	Putative aspartic protease; predicted GPI-anchor; expression induced at high temperature
112	Q6FYB2	CAGL0A03117g		YRA1	25.25	6	9	7	11				RNA binding protein required for export of poly(A)+ mRNA from the nucleus; proposed to couple mRNA export with 3' end processing via its interactions with Mex67p and Pcf11p; functionally redundant with Yra2p, another REF family member	Ortholog(s) have ATP-dependent RNA helicase inhibitor activity, RNA binding activity
113	Q8TG06 #$	CAGL0J11748g	PLB2	PLB2	74.58	15	45	12	25	Yes			Phospholipase B (lysophospholipase) involved in phospholipid metabolism; displays transacylase activity in vitro; overproduction confers resistance to lysophosphatidylcholine	Putative phospholipase B; predicted GPI-anchor
114	Q8TG07 #$	CAGL0J11770g	PLB1	PLB1	71.6	19	90	15	40	Yes		Yes	Phospholipase B (lysophospholipase) involved in lipid metabolism, required for deacylation of phosphatidylcholine and phosphatidylethanolamine but not phosphatidylinositol	Putative phospholipase B; predicted GPI-anchor
115	Q96WT3 #$	CAGL0F06413g	FET3	FET3	71.97	9	19	5	5				Ferro-O2-oxidoreductase required for high-affinity iron uptake and involved in mediating resistance to copper ion toxicity, belongs to class of integral membrane multicopper oxidases	Putative copper ferroxidase involved in iron uptake
116	B4UN11	CAGL0H08541g		NHP6B	10.9	2	3	2	2				High-mobility group (HMG) protein; binds to and remodels nucleosomes; involved in recruiting FACT and other chromatin remodelling complexes to the chromosomes; functionally redundant with Nhp6Ap; required for transcriptional initiation fidelity of some tRNA genes; homologous to mammalian HMGB1 and HMGB2; NHP6B has a paralog, NHP6A, that arose from the whole genome duplication	Ortholog(s) have DNA binding, bending activity
117	Q6FWM7	CAGL0C04411g		HTA2	13.9	1	2	2	3				Histone H2A; core histone protein required for chromatin assembly and chromosome function; one of two nearly identical (see also HTA1) subtypes; DNA damage-dependent phosphorylation by Mec1p facilitates DNA repair; acetylated by Nat4p	Ortholog(s) have role in DNA repair and replication fork protection complex localization
118	Q6FY72	CAGL0A03542g	COX12	COX12	9.8	1	3	1	3				Subunit VIb of cytochrome c oxidase; cytochrome c oxidase is also known as respiratory Complex IV and is the terminal member of the mitochondrial inner membrane electron transport chain; required for assembly of cytochrome c oxidase but not required for activity after assembly; phosphorylated; easily released from the intermembrane space, suggesting a loose association with Complex IV	Cytochrome c oxidase
119	Q6FYA5	CAGL0A03278g		RPL19A	21.7	3	3	2	2				Ribosomal 60S subunit protein L19A; rpl19a and rpl19b single null mutations result in slow growth, while the double null mutation is lethal; homologous to mammalian ribosomal protein L19, no bacterial homolog; RPL19A has a paralog, RPL19B, that arose from the whole genome duplication	Has domain(s) with predicted structural constituent of ribosome activity, role in translation and ribosome localization

## Sheet: Table S4
Table S4: A list of 548 proteins identified in the Cgyps1-11Δ secretome in global secretome analysis.
	Proteins in red-colored font were common between secretomes of wild-type and Cgyps1-11Δ mutant
	#proteins predicted to be secretory by TargetP1.1 server
	$proteins predicted to be secretory by SignalP5.0 server
	¶proteins predicted to be GPI-anchored by Weig et al. 2004
Sr. No.	Reference	CAGL ID	Cg name	Common/Sc name	MWT(kDa)	Replicate 1		Replicate 2		GPI-anchored proteins¶	SGD Description	CGD description
						Unique	Total	Unique	Total
1	B4UMW9	CAGL0A01193g		ACM1	11.81	2	2	3	3		Pseudosubstrate inhibitor of the anaphase-promoting complex/cyclosome (APC/C), that suppresses APC/C [Cdh1]-mediated proteolysis of mitotic cyclins; associates with Cdh1p, Bmh1p and Bmh2p; cell cycle regulated protein	Ortholog(s) have ubiquitin-protein transferase inhibitor activity, role in negative regulation of ubiquitin protein ligase activity and cytoplasm, nucleus localization
2	B4UMX6	CAGL0B02755g		YLR361C-A	7.93	2	5	1	3		Putative protein of unknown function	Ortholog of S. cerevisiae : YLR361C-A and Saccharomyces cerevisiae S288C : YLR361C-A
3	B4UMZ9	CAGL0F06693g		TIM10	10.2	3	4	3	4		Essential protein of the mitochondrial intermembrane space, forms a complex with Tim9p (TIM10 complex) that delivers hydrophobic proteins to the TIM22 complex for insertion into the inner membrane	Ortholog(s) have protein transporter activity, unfolded protein binding activity and role in protein import into mitochondrial inner membrane, protein import into mitochondrial outer membrane
4	B4UN03	CAGL0G07529g		PFD1	12.37	2	2	2	2		Subunit of heterohexameric prefoldin, which binds cytosolic chaperonin and transfers target proteins to it; involved in the biogenesis of actin and of alpha- and gamma-tubulin	Ortholog(s) have unfolded protein binding activity, role in cytoskeleton organization, positive regulation of transcription elongation from RNA polymerase II promoter, protein folding and prefoldin complex localization
5	B4UN08	CAGL0H04691g		MRPL39	7.95	4	6	4	7		mitochondrial ribosomal protein of the large subunit	Ortholog(s) have structural constituent of ribosome activity and mitochondrial large ribosomal subunit localization
6	B4UN11	CAGL0H08541g		NHP6B	10.86	9	29	10	33		High-mobility group (HMG) protein that binds to and remodels nucleosomes; involved in recruiting FACT and other chromatin remodelling complexes to the chromosomes; functionally redundant with Nhp6Ap; homologous to mammalian HMGB1 and HMGB2	Ortholog(s) have DNA binding, bending activity
7	B4UN30 #	CAGL0J06374g		RPP1B	10.59	2	3	3	3		Ribosomal protein P1 beta, component of the ribosomal stalk, which is involved in interaction of translational elongation factors with ribosome; accumulation is regulated by phosphorylation and interaction with the P2 stalk component	Has domain(s) with predicted structural constituent of ribosome activity, role in translational elongation and ribosome localization
8	B4UN34	CAGL0K03459g		SPG4	10.75	5	18	6	17		Protein required for survival at high temperature during stationary phase; not required for growth on nonfermentable carbon sources	Ortholog of S. cerevisiae : SPG4 and Saccharomyces cerevisiae S288C : YMR107W
9	B4UN40	CAGL0K10906g		RPL36A	11.04	10	465	12	372		N-terminally acetylated protein component of the large (60S) ribosomal subunit, nearly identical to Rpl36Bp and has similarity to rat L36 ribosomal protein; binds to 5.8 S rRNA	Ortholog(s) have RNA binding, structural constituent of ribosome activity, role in cytoplasmic translation and cytosolic large ribosomal subunit localization
10	B4UN51	CAGL0L08110g		RPL39	6.34	2	95	2	105		Protein component of the large (60S) ribosomal subunit, has similarity to rat L39 ribosomal protein; required for ribosome biogenesis; loss of both Rpl31p and Rpl39p confers lethality; also exhibits genetic interactions with SIS1 and PAB1	Has domain(s) with predicted structural constituent of ribosome activity, role in translation and ribosome localization
11	B4UN63	CAGL0M11000g		EGO4	10.17	3	4	3	4		Putative protein of unknown function; expression is regulated by Msn2p/Msn4p	Ortholog(s) have cytosol localization
12	B4UN64	CAGL0M11104g		SSS1	8.03	2	3	2	2		Subunit of the Sec61p translocation complex (Sec61p-Sss1p-Sbh1p) that forms a channel for passage of secretory proteins through the endoplasmic reticulum membrane, and of the Ssh1p complex (Ssh1p-Sbh2p-Sss1p); interacts with Ost4p and Wbp1p	Ortholog(s) have P-P-bond-hydrolysis-driven protein transmembrane transporter activity, protein transporter activity, structural molecule activity
13	F2Z613 #$	CAGL0M13849g	GAS2	GAS2	60.36	8	47	9	50	Yes	Beta-1,3-glucanosyltransferase, required for cell wall assembly and also has a role in transcriptional silencing; localizes to the cell surface via a glycosylphosphatidylinositol (GPI) anchor; also found at the nuclear periphery	Putative glycoside hydrolase of the Gas/Phr family; predicted GPI-anchor
14	F2Z629	CAGL0B01203g		RPL37A	9.89	2	213	3	205		Protein component of the large (60S) ribosomal subunit, has similarity to Rpl37Bp and to rat L37 ribosomal protein	Ortholog(s) have role in cleavage in ITS2 between 5.8S rRNA and LSU-rRNA of tricistronic rRNA transcript (SSU-rRNA, 5.8S rRNA, LSU-rRNA) and cytosolic large ribosomal subunit, preribosome, large subunit precursor localization
15	F2Z6C1	CAGL0G05401g		WHI3	72.19	2	2	2	2		RNA binding protein that sequesters CLN3 mRNA in cytoplasmic foci; cytoplasmic retention factor for Cdc28p and associated cyclins; regulates cell fate and dose-dependently regulates the critical cell size required for passage through Start	Ortholog(s) have mRNA binding activity and role in cytoplasmic sequestering of protein, invasive growth in response to glucose limitation, mRNA destabilization, pseudohyphal growth, traversing start control point of mitotic cell cycle
16	F2Z6H6	CAGL0H03069g		NUP145	142.21	7	8	6	8		Essential nucleoporin, subunit of the Nup84p subcomplex; catalyzes its own cleavage in vivo to generate a C-terminal fragment that assembles into the Nup84p subcomplex of the nuclear pore complex, and an N-terminal fragment of unknown function that is homologous to Nup100p; the Nup84 subcomplex has a role in transcription elongation	Ortholog(s) have RNA binding, structural constituent of nuclear pore activity
17	O14429	CAGL0H03795g	LEU2	LEU2	39.28	6	6	5	7		Beta-isopropylmalate dehydrogenase (IMDH), catalyzes the third step in the leucine biosynthesis pathway	3-isopropylmalate dehydrogenase
18	O42819	CAGL0F02123g		SEC4	23.67	8	9	4	4		Rab family GTPase essential for vesicle-mediated exocytic secretion and autophagy; associates with the exocyst component Sec15p and may regulate polarized delivery of transport vesicles to the exocyst at the plasma membrane	Ortholog(s) have GTP binding, GTPase activity
19	O74208	CAGL0F02717g	PDH1	PDR15	174.91	18	21	16	21		Plasma membrane ATP binding cassette (ABC) transporter, multidrug transporter and general stress response factor implicated in cellular detoxification; regulated by Pdr1p, Pdr3p and Pdr8p; promoter contains a PDR responsive element	Multidrug transporter, predicted plasma membrane ATP-binding cassette (ABC) transporter; regulated by Pdr1p; involved in fluconazole resistance
20	O74683 #$	CAGL0C00363g	KRE9	KRE9	30.53	3	10	2	9		Glycoprotein involved in cell wall beta-glucan assembly; null mutation leads to severe growth defects, aberrant multibudded morphology, and mating defects	Protein involved in cell wall beta-1,6-glucan synthesis
21	P25400	CAGL0I01408g	CYC1	CYC1	11.54	13	69	15	78		Cytochrome c, isoform 1; electron carrier of the mitochondrial intermembrane space that transfers electrons from ubiquinone-cytochrome c oxidoreductase to cytochrome c oxidase during cellular respiration	Ortholog(s) have electron transfer activity, role in mitochondrial electron transport, cytochrome c to oxygen, mitochondrial electron transport, ubiquinol to cytochrome c and mitochondrial intermembrane space localization
22	P53989	CAGL0D04290g	SEC14	YKL091C	34.27	7	8	10	10		Putative homolog of Sec14p, which is a phosphatidylinositol/phosphatidylcholine transfer protein involved in lipid metabolism; localizes to the nucleus; contains a CRAL/TRIO domain and binds several lipids in a large-scale study	Ortholog(s) have phosphatidylcholine binding, phosphatidylinositol binding activity and nucleus localization
23	P60009	CAGL0K12694g	ACT1	ACT1	41.66	11	15	13	18		Actin, structural protein involved in cell polarization, endocytosis, and other cytoskeletal functions	Actin; protein abundance decreased in ace2 mutant cells
24	Q6FII6	CAGL0M14113g	TNR2	THI7	64.82	2	3	3	3		Plasma membrane transporter responsible for the uptake of thiamine, member of the major facilitator superfamily of transporters; mutation of human ortholog causes thiamine-responsive megaloblastic anemia	High-affinity transporter of NAD+ precursors; strongly induced under niacin-limiting conditions
25	Q6FIJ1	CAGL0M14003g		PRE5	25.68	2	2	5	5		Alpha 6 subunit of the 20S proteasome	Ortholog(s) have role in proteasomal ubiquitin-independent protein catabolic process, proteasome-mediated ubiquitin-dependent protein catabolic process
26	Q6FIJ4	CAGL0M13937g		GLC8	27.94	5	9	5	9		Regulatory subunit of protein phosphatase 1 (Glc7p), involved in glycogen metabolism and chromosome segregation; proposed to regulate Glc7p activity via conformational alteration; ortholog of the mammalian protein phosphatase inhibitor 2	Ortholog(s) have enzyme activator activity and role in chromosome segregation
27	Q6FIK0 #$	CAGL0M13805g	MP65	SCW10	38.69	15	509	16	504		Cell wall protein with similarity to glucanases; may play a role in conjugation during mating based on mutant phenotype and its regulation by Ste12p	65 kDa mannoprotein
28	Q6FIK8	CAGL0M13629g		YMR295C	20.74	5	11	4	11		Protein of unknown function that associates with ribosomes; green fluorescent protein (GFP)-fusion protein localizes to the cell periphery and bud; YMR295C is not an essential gene	Ortholog of S. cerevisiae : YMR295C, C. albicans SC5314 : C4_06470W_A, C. dubliniensis CD36 : Cd36_45960, C. parapsilosis CDC317 : CPAR2_501070 and Candida tenuis NRRL Y-1498 : CANTEDRAFT_113848
29	Q6FIM1 #	CAGL0M13343g	GND1	GND1	53.48	16	27	13	24		6-phosphogluconate dehydrogenase (decarboxylating), catalyzes an NADPH regenerating reaction in the pentose phosphate pathway; required for growth on D-glucono-delta-lactone and adaptation to oxidative stress	6-phosphogluconate dehydrogenase
30	Q6FIM3	CAGL0M13277g		YNK1	16.84	2	2	4	4		Nucleoside diphosphate kinase, catalyzes the transfer of gamma phosphates from nucleoside triphosphates, usually ATP, to nucleoside diphosphates by a mechanism that involves formation of an autophosphorylated enzyme intermediate	Ortholog(s) have NAD binding, nucleoside diphosphate kinase activity
31	Q6FIP3	CAGL0M12837g		SER33	50.87	5	5	6	6		3-phosphoglycerate dehydrogenase, catalyzes the first step in serine and glycine biosynthesis; isozyme of Ser3p	Ortholog(s) have alpha-ketoglutarate reductase activity, phosphoglycerate dehydrogenase activity and role in serine family amino acid biosynthetic process
32	Q6FIQ3	CAGL0M12617g		YRB2	35.97	6	11	5	8		Protein of unknown function involved in nuclear processes of the Ran-GTPase cycle; involved in nuclear protein export; contains Ran Binding Domain and FxFG repeats; interacts with Srm1p, GTP-Gsp1p, Rna1p and Crm1p; is not essential	Ortholog(s) have role in regulation of chromatin silencing at telomere, ribosomal small subunit export from nucleus and cytosol, nuclear pore, nucleus localization
33	Q6FIR1	CAGL0M12430g	RHR2	GPP1	27.91	4	6	6	8		Constitutively expressed isoform of DL-glycerol-3-phosphatase; involved in glycerol biosynthesis, induced in response to both anaerobic and, along with the Hor2p/Gpp2p isoform, osmotic stress	Putative DL-glycerol phosphatase
34	Q6FIR2	CAGL0M12408g		RPL34B	14.47	3	35	3	29		Protein component of the large (60S) ribosomal subunit, nearly identical to Rpl34Ap and has similarity to rat L34 ribosomal protein	Ortholog(s) have cytosolic large ribosomal subunit localization
35	Q6FIR3	CAGL0M12386g		MMF1	15.62	4	5	5	5		Mitochondrial protein required for transamination of isoleucine but not of valine or leucine; may regulate specificity of branched-chain transaminases Bat1p and Bat2p; interacts genetically with mitochondrial ribosomal protein genes	Ortholog(s) have role in isoleucine biosynthetic process, mitochondrial translation and mitochondrial matrix localization
36	Q6FIR6 #$	CAGL0M12320g		FLC2	86.5	13	31	11	31		Putative FAD transporter; required for uptake of FAD into endoplasmic reticulum; involved in cell wall maintenance	Ortholog(s) have FAD transmembrane transporter activity
37	Q6FIS9	CAGL0M12034g	PYK1	CDC19	54.63	25	53	25	63		Pyruvate kinase, functions as a homotetramer in glycolysis to convert phosphoenolpyruvate to pyruvate, the input for aerobic (TCA cycle) or anaerobic (glucose fermentation) respiration	Pyruvate kinase
38	Q6FIU4	CAGL0M11704g	AHP1	AHP1	18.93	8	29	9	24		Thiol-specific peroxiredoxin, reduces hydroperoxides to protect against oxidative damage; function in vivo requires covalent conjugation to Urm1p	Putative thiol-specific peroxiredoxin; alkyl hydroperoxide reductase; protein differentially expressed in azole resistant strain; expression upregulated in biofilm vs planktonic cell culture; protein abundance decreased in ace2 mutant cells
39	Q6FIU6	CAGL0M11660g		GPP1	27.75	2	2	2	2			Has domain(s) with predicted hydrolase activity
40	Q6FIV0 #$	CAGL0M11572g		LCL2	13.47	1	4	1	3		Putative protein of unknown function; mutant is deficient in amounts of cell wall mannosylphosphate and has long chronological lifespan; genetic interactions suggest a role in ER-associated protein degradation (ERAD)	Ortholog(s) have role in ubiquitin-dependent ERAD pathway
41	Q6FIW5	CAGL0M11242g		YMR226C	29.17	10	10	8	8		NADP(+)-dependent dehydrogenase; acts on serine, L-allo-threonine, and other 3-hydroxy acids; green fluorescent protein fusion protein localizes to the cytoplasm and nucleus; may interact with ribosomes, based on co-purification experiments	Ortholog(s) have carbonyl reductase (NADPH) activity, serine 3-dehydrogenase activity and intracellular localization
42	Q6FIY5	CAGL0M10637g		MRPL50	15.38	8	17	8	16		Mitochondrial ribosomal protein of the large subunit, not essential for mitochondrial translation	Ortholog(s) have structural constituent of ribosome activity and mitochondrial large ribosomal subunit localization
43	Q6FIZ8	CAGL0M10329g		MRP17	13.67	4	4	3	3		Mitochondrial ribosomal protein of the small subunit; MRP17 exhibits genetic interactions with PET122, encoding a COX3-specific translational activator	Ortholog(s) have structural constituent of ribosome activity and mitochondrial small ribosomal subunit localization
44	Q6FJ02	CAGL0M10241g		RPL14A	15.24	8	18	7	13		N-terminally acetylated protein component of the large (60S) ribosomal subunit, nearly identical to Rpl14Bp and has similarity to rat L14 ribosomal protein; rpl14a csh5 double null mutant exhibits synthetic slow growth	Ortholog(s) have RNA binding activity, role in macroautophagy and cytosolic large ribosomal subunit localization
45	Q6FJ23 #$	CAGL0M09779g	CTS1	CTS1	54.57	7	54	7	41		Endochitinase, required for cell separation after mitosis; transcriptional activation during the G1 phase of the cell cycle is mediated by transcription factor Ace2p	Putative endochitinase with a predicted role in cell separation
46	Q6FJ33	CAGL0M09581g	ATP1	ATP1	58.49	7	11	10	13		Alpha subunit of the F1 sector of mitochondrial F1F0 ATP synthase, which is a large, evolutionarily conserved enzyme complex required for ATP synthesis; phosphorylated	F1F0-ATPase complex, F1 alpha subunit
47	Q6FJ68 #$	CAGL0M08756g		EXG2	65.02	15	28	15	28	Yes	Exo-1,3-beta-glucanase, involved in cell wall beta-glucan assembly; may be anchored to the plasma membrane via a glycosylphosphatidylinositol (GPI) anchor	Putative exo-1,3-beta-glucanase; predicted GPI-anchor
48	Q6FJ69 #	CAGL0M08734g		YDR262W	28.41	4	4	3	3		Putative protein of unknown function; green fluorescent protein (GFP)-fusion protein localizes to the vacuole and is induced in response to the DNA-damaging agent MMS; gene expression increases in response to Zymoliase treatment	Ortholog of S. cerevisiae : YDR262W, C. albicans SC5314 : C1_03120W_A, C. dubliniensis CD36 : Cd36_02920, C. parapsilosis CDC317 : CPAR2_108490 and Candida tenuis NRRL Y-1498 : CANTEDRAFT_112432
49	Q6FJ79 #$	CAGL0M08514g	PIR5	PIR3	21.92	7	247	6	240		O-glycosylated covalently-bound cell wall protein required for cell wall stability; expression is cell cycle regulated, peaking in M/G1 and also subject to regulation by the cell integrity pathway	Pir protein family member, putative cell wall component
50	Q6FJ80 #$	CAGL0M08492g	PIR3	PIR1	34.06	10	249	7	176		O-glycosylated protein required for cell wall stability; attached to the cell wall via beta-1,3-glucan; mediates mitochondrial translocation of Apn1p; expression regulated by the cell integrity pathway and by Swi5p during the cell cycle	Pir protein family member, putative cell wall component
51	Q6FJ92 #$	CAGL0M08206g		TOH1	43.56	11	38	11	45		GPI-anchored cell wall protein of unknown function; induced in response to cell wall damaging agents and by mutations in genes involved in cell wall biogenesis; sequence similarity to YBR162C/TOS1, a covalently bound cell wall protein	Protein of unknown function
52	Q6FJ95	CAGL0M08118g		RPL17A	20.62	8	34	7	31		Protein component of the large (60S) ribosomal subunit, nearly identical to Rpl17Bp and has similarity to E. coli L22 and rat L17 ribosomal proteins; copurifies with the Dam1 complex (aka DASH complex)	Ortholog(s) have structural constituent of ribosome activity and role in cleavage in ITS2 between 5.8S rRNA and LSU-rRNA of tricistronic rRNA transcript (SSU-rRNA, 5.8S rRNA, LSU-rRNA), cytoplasmic translation
53	Q6FJA1	CAGL0M07986g		PET191	12.31	4	21	5	28		Protein required for assembly of cytochrome c oxidase; exists as an oligomer that is integral to the mitochondrial inner membrane and faces the intermembrane space; contains a twin Cx9C motif	Ortholog(s) have role in mitochondrial respiratory chain complex IV assembly and integral component of mitochondrial inner membrane, mitochondrial intermembrane space localization
54	Q6FJA3	CAGL0M07920g	PDC	PDC1	61.87	39	133	41	121		Major of three pyruvate decarboxylase isozymes, key enzyme in alcoholic fermentation, decarboxylates pyruvate to acetaldehyde; subject to glucose-, ethanol-, and autoregulation; involved in amino acid catabolism	Pyruvate decarboxylase, involved in pyruvate metabolism; increased in azole resistant strain and in ace2 mutant cells
55	Q6FJD5	CAGL0M07161g	EGD2	EGD2	17.88	14	67	13	58		Alpha subunit of the heteromeric nascent polypeptide-associated complex (NAC) involved in protein sorting and translocation, associated with cytoplasmic ribosomes	Alpha subunit of the nascent polypeptide-associated complex; protein abundance decreased in ace2 mutant cells
56	Q6FJG3	CAGL0M06523g		RPL21A	18.13	5	6	5	8		Protein component of the large (60S) ribosomal subunit, nearly identical to Rpl21Bp and has similarity to rat L21 ribosomal protein	Ortholog(s) have cytosolic large ribosomal subunit localization
57	Q6FJH3	CAGL0H05643g;		RPS6A	26.92	4	6	6	9		Protein component of the small (40S) ribosomal subunit; identical to Rps6Bp and has similarity to rat S6 ribosomal protein	Ortholog(s) have structural constituent of ribosome activity and role in maturation of SSU-rRNA from tricistronic rRNA transcript (SSU-rRNA, 5.8S rRNA, LSU-rRNA)
58	Q6FJI7	CAGL0M05995g		PET10	35.25	2	2	3	3		Protein of unknown function that co-purifies with lipid particles; expression pattern suggests a role in respiratory growth; computational analysis of large-scale protein-protein interaction data suggests a role in ATP/ADP exchange	Ortholog(s) have lipid droplet localization
59	Q6FJK2	CAGL0M05665g		PBI2	8.55	5	5	4	4		Cytosolic inhibitor of vacuolar proteinase B (PRB1), required for efficient vacuole inheritance; with thioredoxin forms protein complex LMA1, which assists in priming SNARE molecules and promotes vacuole fusion	Ortholog(s) have endopeptidase inhibitor activity, role in regulation of proteolysis, vacuole fusion, non-autophagic and fungal-type vacuole localization
60	Q6FJK5 #$	CAGL0M05599g		TOS1	47.08	13	325	11	287		Covalently-bound cell wall protein of unknown function; identified as a cell cycle regulated SBF target gene; deletion mutants are highly resistant to treatment with beta-1,3-glucanase; has sequence similarity to YJL171C	Ortholog(s) have cell surface, extracellular region, hyphal cell wall localization
61	Q6FJL9	CAGL0M05269g		AIM4	15.14	6	6	5	6		Protein proposed to be associated with the nuclear pore complex; null mutant is viable, displays elevated frequency of mitochondrial genome loss and is sensitive to freeze-thaw stress	Ortholog(s) have cytoplasm localization
62	Q6FJN0	CAGL0M04983g		MBF1	16.35	15	170	15	146		Transcriptional coactivator that bridges the DNA-binding region of Gcn4p and TATA-binding protein Spt15p; suppressor of frameshift mutations	Has domain(s) with predicted DNA binding, sequence-specific DNA binding activity
63	Q6FJN5	CAGL0M04873g		RPS10A	12.65	2	2	3	3		Protein component of the small (40S) ribosomal subunit; nearly identical to Rps10Bp and has similarity to rat ribosomal protein S10	Ortholog(s) have role in rRNA export from nucleus and cell surface localization
64	Q6FJP3	CAGL0M04675g		RDL1	15.26	2	2	3	3		Protein of unknown function containing a rhodanese-like domain; localized to the mitochondrial outer membrane	Ortholog(s) have thiosulfate sulfurtransferase activity
65	Q6FJP5	CAGL0M04631g		SMD3	11.33	5	7	6	8		Core Sm protein Sm D3; part of heteroheptameric complex (with Smb1p, Smd1p, Smd2p, Sme1p, Smx3p, and Smx2p) that is part of the spliceosomal U1, U2, U4, and U5 snRNPs; homolog of human Sm D3	Putative spliceosome component; gene is upregulated in azole-resistant strain
66	Q6FJP9	CAGL0M04543g			32.64	1	2	2	4			Protein of unknown function
67	Q6FJT0	CAGL0M03861g		RPL25	15.69	6	8	7	10		Primary rRNA-binding ribosomal protein component of the large (60S) ribosomal subunit, has similarity to E. coli L23 and rat L23a ribosomal proteins; binds to 25S rRNA via a conserved C-terminal motif	Has domain(s) with predicted nucleotide binding, structural constituent of ribosome activity, role in translation and ribosome localization
68	Q6FJT6	CAGL0M03729g		CLA4	94.77	5	5	3	3		Cdc42p-activated signal transducing kinase of the PAK (p21-activated kinase) family, along with Ste20p and Skm1p; involved in septin ring assembly, vacuole inheritance, cytokinesis, sterol uptake regulation; phosphorylates Cdc3p and Cdc10p	Ortholog(s) have protein serine/threonine kinase activity
69	Q6FJU2 #$	CAGL0M03597g	MID1	MID1	65.73	2	2	3	3		N-glycosylated integral membrane protein of the ER membrane and plasma membrane, functions as a stretch-activated Ca2+-permeable cation channel required for Ca2+ influx stimulated by pheromone; interacts with Cch1p; forms an oligomer	Putative calcium transporter; putative regulatory subunit of a plasma membrane gated channel involved in Ca2+ uptake; required for viability upon prolonged fluconazole stress
70	Q6FJX0	CAGL0M02937g		DSK2	39.82	5	6	6	8		Nuclear-enriched ubiquitin-like polyubiquitin-binding protein, required for spindle pole body (SPB) duplication and for transit through the G2/M phase of the cell cycle, involved in proteolysis, interacts with the proteasome	Ortholog(s) have protein binding, bridging activity and role in protein localization to vacuole, spindle pole body duplication, ubiquitin-dependent ERAD pathway
71	Q6FJX6	CAGL0M02783g		HHO1	24.86	4	4	3	3		Histone H1, a linker histone required for nucleosome packaging at restricted sites; suppresses DNA repair involving homologous recombination; not required for telomeric silencing, basal transcriptional repression, or efficient sporulation	Has domain(s) with predicted DNA binding activity, role in nucleosome assembly and nucleosome, nucleus localization
72	Q6FJZ0	CAGL0M02497g		RPL33A	12.13	3	3	2	2		N-terminally acetylated ribosomal protein L37 of the large (60S) ribosomal subunit, nearly identical to Rpl33Bp and has similarity to rat L35a; rpl33a null mutant exhibits slow growth while rpl33a rpl33b double null mutant is inviable	Ortholog(s) have structural constituent of ribosome activity, role in cytoplasmic translation and cytosolic large ribosomal subunit localization
73	Q6FK02 #$	CAGL0M02211g	PEP4	PEP4	45.35	8	10	7	10		Vacuolar aspartyl protease (proteinase A), required for the posttranslational precursor maturation of vacuolar proteinases; important for protein turnover after oxidative damage; synthesized as a zymogen, self-activates	Putative aspartyl protease Saccharopepsin precursor; expression upregulated in biofilm vs planktonic cell culture
74	Q6FK04 #	CAGL0M02167g		PRM4	25.74	3	4	4	5		Pheromone-regulated protein proposed to be involved in mating; predicted to have 1 transmembrane segment; transcriptionally regulated by Ste12p during mating and by Cat8p during the diauxic shift	Ortholog of S. cerevisiae : PRM4 and Saccharomyces cerevisiae S288C : YPL156C
75	Q6FK20 #$	CAGL0M01826g	ECM33	ECM33	43.04	4	28	4	32	Yes	GPI-anchored protein of unknown function, has a possible role in apical bud growth; GPI-anchoring on the plasma membrane crucial to function; phosphorylated in mitochondria; similar to Sps2p and Pst1p	Ecm33-family protein with a predicted role in cell wall biogenesis and organization; predicted GPI-anchor
76	Q6FK23	CAGL0M01760g	CDR1	CDR1	169.2	38	69	36	88			Multidrug transporter of ATP-binding cassette (ABC) superfamily, involved in resistance to azoles; expression regulated by Pdr1p; increased abundance in azole resistant strains; expression increased by loss of the mitochondrial genome
77	Q6FK31	CAGL0M01562g		YDR391C	25.19	2	2	2	2		Putative protein of unknown function, possibly involved in zinc homeostasis; Bdf1p-dependent transcription induced by salt stress; green fluorescent protein (GFP)-fusion protein localizes to both the cytoplasm and the nucleus	Ortholog of S. cerevisiae : YDR391C, Debaryomyces hansenii CBS767 : DEHA2D01298g and Saccharomyces cerevisiae S288C : YDR391C
78	Q6FK35	CAGL0M01474g		NCB2	16.28	2	3	1	2		Subunit of a heterodimeric NC2 transcription regulator complex with Bur6p; complex binds to TBP and can repress transcription by preventing preinitiation complex assembly or stimulate activated transcription; homologous to human NC2beta	Ortholog(s) have RNA polymerase II transcription factor activity, TBP-class protein binding, RNA polymerase II transcription factor activity and TBP-class protein binding, more
79	Q6FK59	CAGL0M00902g		DIF1	13.29	3	4	5	7		Protein that regulates the nuclear localization of ribonucleotide reductase Rnr2p and Rnr4p subunits; phosphorylated by Dun1p in response to DNA damage and degraded; N-terminal half has similarity to S. pombe Spd1 protein	Ortholog of S. cerevisiae : DIF1, C. albicans SC5314 : C4_00170W_A, C. dubliniensis CD36 : Cd36_40240, C. parapsilosis CDC317 : CPAR2_402690 and Candida tenuis NRRL Y-1498 : CANTEDRAFT_115067
80	Q6FK63	CAGL0M00814g		RPS1A	28.71	3	3	3	4		Ribosomal protein 10 (rp10) of the small (40S) subunit; nearly identical to Rps1Bp and has similarity to rat S3a ribosomal protein	Ortholog(s) have role in maturation of SSU-rRNA from tricistronic rRNA transcript (SSU-rRNA, 5.8S rRNA, LSU-rRNA) and extracellular region localization
81	Q6FK81	CAGL0M00418g		TIM8	9.68	2	4	2	4		Mitochondrial intermembrane space protein, forms a complex with Tim13p that delivers a subset of hydrophobic proteins to the TIM22 complex for inner membrane insertion; homolog of human TIMM8A, implicated in Mohr-Tranebjaerg syndrome	Ortholog(s) have protein transporter activity, role in protein import into mitochondrial inner membrane and mitochondrial intermembrane space protein transporter complex localization
82	Q6FK85	CAGL0M00330g	HOM6	HOM6	38.6	9	13	5	8		Homoserine dehydrogenase (L-homoserine:NADP oxidoreductase), dimeric enzyme that catalyzes the third step in the common pathway for methionine and threonine biosynthesis; enzyme has nucleotide-binding, dimerization and catalytic regions	Ortholog(s) have homoserine dehydrogenase activity and role in homoserine biosynthetic process, methionine biosynthetic process, threonine biosynthetic process
83	Q6FKA0	CAGL0L13222g		SIC1	31.53	2	2	3	3		Inhibitor of Cdc28-Clb kinase complexes that controls G1/S phase transition, preventing premature S phase and ensuring genomic integrity; phosphorylation targets Sic1p for SCF(CDC4)-dependent turnover; functional homolog of mammalian Kip1	Ortholog(s) have cyclin-dependent protein serine/threonine kinase inhibitor activity
84	Q6FKB4	CAGL0L12914g		YKL050C	97.49	16	20	18	45		Protein of unknown function; the YKL050W protein is a target of the SCFCdc4 ubiquitin ligase complex and YKL050W transcription is regulated by Azf1p	Ortholog of S. cerevisiae : YKL050C and Saccharomyces cerevisiae S288C : YKL050C
85	Q6FKB6	CAGL0L12870g		TMA19	18.67	7	9	5	6		Protein that associates with ribosomes; homolog of translationally controlled tumor protein; green fluorescent protein (GFP)-fusion protein localizes to the cytoplasm and relocates to the mitochondrial outer surface upon oxidative stress	Protein of unknown function
86	Q6FKC4	CAGL0L12694g		VPS16	92.97	1	14	1	18		Subunit of the vacuole fusion and protein sorting HOPS complex and the CORVET tethering complex; part of the Class C Vps complex essential for membrane docking and fusion at Golgi-to-endosome and endosome-to-vacuole protein transport stages	Ortholog(s) have phosphatidylinositol binding activity
87	Q6FKD1	CAGL0L12540g		EGD1	16.78	3	5	2	2		Subunit beta1 of the nascent polypeptide-associated complex (NAC) involved in protein targeting, associated with cytoplasmic ribosomes; enhances DNA binding of the Gal4p activator; homolog of human BTF3b	Ortholog(s) have unfolded protein binding activity and role in 'de novo' cotranslational protein folding, macroautophagy, posttranslational protein targeting to endoplasmic reticulum membrane
88	Q6FKD8	CAGL0L12364g	ERG10	ERG10	41.61	8	14	7	12		Acetyl-CoA C-acetyltransferase (acetoacetyl-CoA thiolase), cytosolic enzyme that transfers an acetyl group from one acetyl-CoA molecule to another, forming acetoacetyl-CoA; involved in the first step in mevalonate biosynthesis	Ortholog(s) have acetyl-CoA C-acetyltransferase activity, role in ergosterol biosynthetic process and cytoplasm localization
89	Q6FKD9	CAGL0L12342g		SUL2	100.58	8	9	9	13		High affinity sulfate permease; sulfate uptake is mediated by specific sulfate transporters Sul1p and Sul2p, which control the concentration of endogenous activated sulfate intermediates	Ortholog(s) have sulfate transmembrane transporter activity, role in sulfate transport and plasma membrane localization
90	Q6FKF2	CAGL0L12056g	BMH1(A)	BMH1	28.35	6	8	3	4		14-3-3 protein, major isoform; controls proteome at post-transcriptional level, binds proteins and DNA, involved in regulation of many processes including exocytosis, vesicle transport, Ras/MAPK signaling, and rapamycin-sensitive signaling	14-3-3 protein
91	Q6FKG3	CAGL0L11814g		DNF1	178.86	26	31	27	32		Aminophospholipid translocase (flippase) that localizes primarily to the plasma membrane; contributes to endocytosis, protein transport and cell polarity; type 4 P-type ATPase	Ortholog(s) have ATPase activity, coupled to transmembrane movement of ions, phosphorylative mechanism, phospholipid-translocating ATPase activity
92	Q6FKH8	CAGL0L11462g		RPL6A	19.91	9	34	10	27		N-terminally acetylated protein component of the large (60S) ribosomal subunit, has similarity to Rpl6Bp and to rat L6 ribosomal protein; binds to 5.8S rRNA	Ortholog(s) have RNA binding, structural constituent of ribosome activity, role in cytoplasmic translation, ribosomal large subunit assembly and cytosolic large ribosomal subunit localization
93	Q6FKJ9	CAGL0L10978g		CAF20	17.26	2	2	3	3		Phosphoprotein of the mRNA cap-binding complex involved in translational control, repressor of cap-dependent translation initiation, competes with eIF4G for binding to eIF4E	Ortholog(s) have role in negative regulation of translation, positive regulation of cytoplasmic mRNA processing body assembly and mRNA cap binding complex localization
94	Q6FKK2	CAGL0L10912g		TPO4	72.62	3	3	2	2		Polyamine transport protein, recognizes spermine, putrescine, and spermidine; localizes to the plasma membrane; member of the major facilitator superfamily	Ortholog(s) have spermidine transmembrane transporter activity, spermine transmembrane transporter activity, role in spermidine transport, spermine transport and fungal-type vacuole membrane, plasma membrane localization
95	Q6FKP0	CAGL0L09933g		CUE5	46.87	3	3	5	5		Protein containing a CUE domain that binds ubiquitin, which may facilitate intramolecular monoubiquitination; green fluorescent protein (GFP)-fusion protein localizes to the cytoplasm in a punctate pattern	Ortholog(s) have protein binding, bridging, ubiquitin binding activity and role in ubiquitin-dependent protein catabolic process
96	Q6FKQ6	CAGL0L09581g		DUT1	15.3	2	2	2	2		deoxyuridine triphosphate diphosphatase (dUTPase); catalyzes hydrolysis of dUTP to dUMP and PPi, thereby preventing incorporation of uracil into DNA during replication; critical for the maintenance of genetic stability; also has diphosphatase activity on deoxyinosine triphosphate	Has domain(s) with predicted dUTP diphosphatase activity, hydrolase activity and role in dUTP metabolic process
97	Q6FKR7	CAGL0L09229g		AIM45	35.87	2	2	3	4		Putative ortholog of mammalian electron transfer flavoprotein complex subunit ETF-alpha; interacts with frataxin, Yfh1p; null mutant displays elevated frequency of mitochondrial genome loss; may have a role in oxidative stress response	Ortholog(s) have mitochondrion localization
98	Q6FKT9	CAGL0L08734g		MRPS16	13.54	4	5	4	4		Mitochondrial ribosomal protein of the small subunit	Ortholog(s) have structural constituent of ribosome activity and mitochondrial small ribosomal subunit localization
99	Q6FKV0 #	CAGL0L08448g		NCE102	19.42	4	6	3	3		Protein of unknown function; contains transmembrane domains; involved in secretion of proteins that lack classical secretory signal sequences; component of the detergent-insoluble glycolipid-enriched complexes (DIGs)	Ortholog(s) have role in actin cytoskeleton organization, eisosome assembly, negative regulation of protein phosphorylation, negative regulation of sphingolipid biosynthetic process and pathogenesis, more
100	Q6FKY1	CAGL0L07722g	PGK1	PGK1	44.59	23	59	21	57		3-phosphoglycerate kinase, catalyzes transfer of high-energy phosphoryl groups from the acyl phosphate of 1,3-bisphosphoglycerate to ADP to produce ATP; key enzyme in glycolysis and gluconeogenesis	Putative 3-phosphoglycerate kinase; protein differentially expressed in azole resistant strain; protein abundance increased in ace2 mutant cells
101	Q6FKY8	CAGL0L07546g		BAP3	70.44	7	11	6	10		Amino acid permease involved in the uptake of cysteine, leucine, isoleucine and valine	Ortholog(s) have amino acid transmembrane transporter activity and role in amino acid transport, transmembrane transport
102	Q6FKZ3	CAGL0L07436g	PHO2	PHO2	56.2	4	4	4	5		Homeobox transcription factor; regulatory targets include genes involved in phosphate metabolism; binds cooperatively with Pho4p to the PHO5 promoter; phosphorylation of Pho2p facilitates interaction with Pho4p	Ortholog(s) have RNA polymerase II proximal promoter sequence-specific DNA binding, proximal promoter DNA-binding transcription activator activity, RNA polymerase II-specific activity
103	Q6FL06	CAGL0L07150g		SRP14	15.84	3	4	3	4		Signal recognition particle (SRP) subunit, interacts with the RNA component of SRP to form the Alu domain, which is the region of SRP responsible for arrest of nascent chain elongation during membrane targeting; homolog of mammalian SRP14	Ortholog(s) have 7S RNA binding activity, role in SRP-dependent cotranslational protein targeting to membrane, translocation and signal recognition particle, endoplasmic reticulum targeting localization
104	Q6FL14	CAGL0L06974g		YDL086W	30.62	1	2	2	2		Putative protein of unknown function; the authentic, non-tagged protein is detected in highly purified mitochondria in high-throughput studies; YDL086W is not an essential gene	Has domain(s) with predicted hydrolase activity
105	Q6FL18	CAGL0L06886g		RPL13A	22.61	9	33	9	26		Protein component of the large (60S) ribosomal subunit, nearly identical to Rpl13Bp; not essential for viability; has similarity to rat L13 ribosomal protein	Ortholog(s) have cell surface, cytosolic large ribosomal subunit localization
106	Q6FL46	CAGL0L06270g	BMH1(B)	BMH2	28.32	8	9	9	9		14-3-3 protein, minor isoform; controls proteome at post-transcriptional level, binds proteins and DNA, involved in regulation of many processes including exocytosis, vesicle transport, Ras/MAPK signaling, and rapamycin-sensitive signaling	14-3-3 protein
107	Q6FL47	CAGL0L06248g		YBR085C-A	9.81	4	5	3	3		Putative protein of unknown function; green fluorescent protein (GFP)-fusion protein localizes to the cytoplasm and to the nucleus	Ortholog of S. cerevisiae : YBR085C-A and Saccharomyces cerevisiae S288C : YBR085C-A
108	Q6FL51	CAGL0L06160g		COX4	16.92	7	7	6	7		Subunit IV of cytochrome c oxidase, the terminal member of the mitochondrial inner membrane electron transport chain; precursor N-terminal 25 residues are cleaved during mitochondrial import; phosphorylated; spermidine enhances translation	Ortholog(s) have cytochrome-c oxidase activity, zinc ion binding activity and role in mitochondrial electron transport, cytochrome c to oxygen
109	Q6FL57	CAGL0L06028g		GTS1	56.67	2	2	2	2		Protein involved in Arf3p regulation and in transcription regulation; localizes to the nucleus and to endocytic patches; contains an N-terminal Zn-finger and ArfGAP homology domain, a C-terminal glutamine-rich region, and a UBA (ubiquitin associated) domain; gts1 mutations affect budding, cell size, heat tolerance, sporulation, life span, ultradian rhythms, endocytosis; expression oscillates in a…	Ortholog(s) have GTPase activator activity, repressing transcription factor binding activity
110	Q6FL68	CAGL0L05786g		CMR3	37.97	2	2	2	2		Putative zinc finger protein; YPR013C is not an essential gene	Has domain(s) with predicted nucleic acid binding, zinc ion binding activity
111	Q6FL81	CAGL0L05478g		RPE1	26.84	2	3	2	2		D-ribulose-5-phosphate 3-epimerase, catalyzes a reaction in the non-oxidative part of the pentose-phosphate pathway; mutants are sensitive to oxidative stress	Ortholog(s) have ribulose-phosphate 3-epimerase activity and role in pentose-phosphate shunt
112	Q6FL83 #$	CAGL0L05434g	SUN4	NCA3	36.16	16	86	18	78		Protein that functions with Nca2p to regulate mitochondrial expression of subunits 6 (Atp6p) and 8 (Atp8p ) of the Fo-F1 ATP synthase; member of the SUN family; expression induced in cells treated with the mycotoxin patulin	Ortholog(s) have role in fungal-type cell wall organization or biogenesis, mitochondrion organization and fungal-type cell wall localization
113	Q6FL92	CAGL0L05236g	MDH1	MDH1	35.54	10	10	9	9		Mitochondrial malate dehydrogenase, catalyzes interconversion of malate and oxaloacetate; involved in the tricarboxylic acid (TCA) cycle; phosphorylated	Malate dehydrogenase
114	Q6FLA5	CAGL0L04928g		NUP100	105.44	2	2	5	6		Subunit of the nuclear pore complex (NPC) that is localized to both sides of the pore; contains a repetitive GLFG motif that interacts with mRNA export factor Mex67p and with karyopherin Kap95p; homologous to Nup116p	Ortholog(s) have structural constituent of nuclear pore activity
115	Q6FLA8	CAGL0L04840g		RPS23A	16.03	3	5	4	7		Ribosomal protein 28 (rp28) of the small (40S) ribosomal subunit, required for translational accuracy; nearly identical to Rps23Bp and similar to E. coli S12 and rat S23 ribosomal proteins; deletion of both RPS23A and RPS23B is lethal	Ortholog(s) have structural constituent of ribosome activity
116	Q6FLC3	CAGL0K06061g		RPS28B	7.62	7	17	6	15		Protein component of the small (40S) ribosomal subunit; nearly identical to Rps28Ap and has similarity to rat S28 ribosomal protein	Ortholog(s) have structural constituent of ribosome activity
117	Q6FLH9 #$	CAGL0L03289g		UTH1	37.8	11	257	11	226		Mitochondrial outer membrane and cell wall localized SUN family member involved in cell wall biogenesis and required for mitochondrial autophagy; involved in the oxidative stress response, life span during starvation, and cell death	Ortholog(s) have role in autophagy of mitochondrion, fungal-type cell wall biogenesis, fungal-type cell wall organization
118	Q6FLI0	CAGL0L03267g	GAP1	GAP1	65.57	9	11	7	11		General amino acid permease; Gap1p senses the presence of amino acid substrates to regulate localization to the plasma membrane when needed	Ortholog(s) have L-proline transmembrane transporter activity, polyamine transmembrane transporter activity and role in amino acid transmembrane transport, nitrogen utilization, polyamine transport
119	Q6FLL2 #	CAGL0L02563g		AIM20	40.41	2	2	3	3		Putative protein of unknown function; overexpression causes a cell cycle delay or arrest; green fluorescent protein (GFP)-fusion protein localizes to the vacuole; null mutant displays elevated frequency of mitochondrial genome loss	Ortholog of S. cerevisiae : AIM20 and Saccharomyces cerevisiae S288C : YIL158W
120	Q6FLL5	CAGL0L02497g	FBA1	FBA1	39.33	15	54	17	51		Fructose 1,6-bisphosphate aldolase, required for glycolysis and gluconeogenesis; catalyzes conversion of fructose 1,6 bisphosphate to glyceraldehyde-3-P and dihydroxyacetone-P; locates to mitochondrial outer surface upon oxidative stress	Fructose-bisphosphate aldolase; expression downregulated in biofilm vs planktonic cell culture; protein abundance increased in ace2 mutant cells
121	Q6FLM3	CAGL0L02321g		MET14	23.32	2	2	3	3		Adenylylsulfate kinase, required for sulfate assimilation and involved in methionine metabolism	Ortholog(s) have adenylylsulfate kinase activity and role in sulfate assimilation, phosphoadenylyl sulfate reduction by phosphoadenylyl-sulfate reductase (thioredoxin), sulfur amino acid metabolic process
122	Q6FLM4	CAGL0L02299g	VPS1	VPS1	78.3	2	2	2	2		Dynamin-like GTPase required for vacuolar sorting; also involved in actin cytoskeleton organization, endocytosis, late Golgi-retention of some proteins, regulation of peroxisome biogenesis	Ortholog(s) have GTPase activity
123	Q6FLN7	CAGL0L02013g		IXR1	56.7	2	5	3	6		Protein that binds DNA containing intrastrand cross-links formed by cisplatin, contains two HMG (high mobility group box) domains, which confer the ability to bend cisplatin-modified DNA; mediates aerobic transcriptional repression of COX5b	Ortholog(s) have damaged DNA binding, sequence-specific DNA binding activity and role in cellular response to hypoxia, negative regulation of transcription by RNA polymerase II, regulation of nucleotide-excision repair
124	Q6FLQ4 #	CAGL0L01551g		SUR7	34.68	3	7	3	7		Plasma membrane protein that localizes to furrow-like invaginations (MCC patches); component of eisosomes; associated with endocytosis, along with Pil1p and Lsp1p; sporulation and plasma membrane sphingolipid content are altered in mutants	Ortholog(s) have role in ascospore formation, cellular response to biotic stimulus, cellular response to chemical stimulus, cellular response to glucose starvation and cellular response to neutral pH, more
125	Q6FLR2	CAGL0I01430g		ANB1	17.19	10	15	10	16		Translation elongation factor eIF-5A, previously thought to function in translation initiation; similar to and functionally redundant with Hyp2p; undergoes an essential hypusination modification; expressed under anaerobic conditions	Ortholog(s) have role in positive regulation of translational elongation, translational frameshifting
126	Q6FLS4	CAGL0L01067g		PAR32	22.35	4	14	4	15		Putative protein of unknown function; hyperphosphorylated upon rapamycin treatment in a Tap42p-dependent manner; green fluorescent protein (GFP)-fusion protein localizes to the cytoplasm; PAR32 is not an essential gene	Ortholog(s) have cytoplasm localization
127	Q6FLT7	CAGL0L00759g	HIS1	HIS1	33.92	3	3	3	4		ATP phosphoribosyltransferase, a hexameric enzyme, catalyzes the first step in histidine biosynthesis; mutations cause histidine auxotrophy and sensitivity to Cu, Co, and Ni salts; transcription is regulated by general amino acid control	ATP phosphoribosyltransferase; protein abundance increased in ace2 mutant cells
128	Q6FLU9	CAGL0L00495g	HSC82	HSC82	80.98	2	2	2	2		Cytoplasmic chaperone of the Hsp90 family, redundant in function and nearly identical with Hsp82p, and together they are essential; expressed constitutively at 10-fold higher basal levels than HSP82 and induced 2-3 fold by heat shock	Putative heat shock protein
129	Q6FLW9	CAGL0K12848g	SEC53	SEC53	29.13	6	7	7	7		Phosphomannomutase, involved in synthesis of GDP-mannose and dolichol-phosphate-mannose; required for folding and glycosylation of secretory proteins in the ER lumen	Putative phosphomannomutase; protein differentially expressed in azole resistant strain
130	Q6FLX0	CAGL0K12826g		RPL10	25.49	2	2	2	2		Protein component of the large (60S) ribosomal subunit, responsible for joining the 40S and 60S subunits; regulates translation initiation; has similarity to rat L10 ribosomal protein and to members of the QM gene family	Has domain(s) with predicted structural constituent of ribosome activity, role in translation and ribosome localization
131	Q6FM06	CAGL0K12034g	ENA1	ENA1	120.2	6	6	6	6		P-type ATPase sodium pump, involved in Na+ and Li+ efflux to allow salt tolerance	Na(+)-ATPase with broad substrate specificity; plays a role in sodium detoxification; highly upregulated by increased osmotic pressure or sodium concentration
132	Q6FM07	CAGL0K12012g	KRS1	KRS1	67.94	3	3	4	4		Lysyl-tRNA synthetase	Lysyl-tRNA synthetase
133	Q6FM13	CAGL0K11858g		PST2	20.96	9	32	8	25		Protein with similarity to members of a family of flavodoxin-like proteins; induced by oxidative stress in a Yap1p dependent manner; the authentic, non-tagged protein is detected in highly purified mitochondria in high-throughput studies	Putative flavodoxin
134	Q6FM18	CAGL0K11748g	RPS11B	RPS11A	17.88	3	4	4	5		Protein component of the small (40S) ribosomal subunit; identical to Rps11Bp and has similarity to E. coli S17 and rat S11 ribosomal proteins	Protein component of the small (40S) ribosomal subunit; expression upregulated in biofilm vs planktonic cell culture
135	Q6FM21	CAGL0K11660g		SRP21	20.61	7	15	6	14		Subunit of the signal recognition particle (SRP), which functions in protein targeting to the endoplasmic reticulum membrane; not found in mammalian SRP; forms a pre-SRP structure in the nucleolus that is translocated to the cytoplasm	Ortholog(s) have role in SRP-dependent cotranslational protein targeting to membrane, translocation and signal recognition particle, endoplasmic reticulum targeting localization
136	Q6FM25	CAGL0K11572g		SBA1	23.86	3	3	2	2		Co-chaperone that binds to and regulates Hsp90 family chaperones; important for pp60v-src activity in yeast; homologous to the mammalian p23 proteins and like p23 can regulate telomerase activity	Ortholog(s) have chaperone binding activity, role in negative regulation of DNA binding, positive regulation of telomere maintenance via telomerase, protein folding, regulation of telomerase activity and cytoplasm, nucleus localization
137	Q6FM32	CAGL0K11418g	ADK1	ADK1	24.38	7	7	7	7		Adenylate kinase, required for purine metabolism; localized to the cytoplasm and the mitochondria; lacks cleavable signal sequence	Putative adenylate kinase; protein differentially expressed in azole resistant strain
138	Q6FM59	CAGL0K10780g		IMD4	56.97	3	5	5	6		Inosine monophosphate dehydrogenase, catalyzes the first step of GMP biosynthesis, member of a four-gene family in S. cerevisiae, constitutively expressed	Ortholog(s) have IMP dehydrogenase activity
139	Q6FM73	CAGL0K10384g		FAB1	241.71	7	14	7	17		1-phosphatidylinositol-3-phosphate 5-kinase; vacuolar membrane kinase that generates phosphatidylinositol (3,5)P2, which is involved in vacuolar sorting and homeostasis	Ortholog(s) have 1-phosphatidylinositol-3-phosphate 5-kinase activity, phosphatidylinositol-3-phosphate binding activity
140	Q6FM94	CAGL0K09922g		VTS1	59.79	5	5	4	4		Post-transcriptional gene regulator, flap-structured DNA-binding and RNA-binding protein; shows genetic interactions with Vti1p, a v-SNARE involved in cis-Golgi membrane traffic; stimulates Dna2p endonuclease activity; contains a SAM domain	Ortholog(s) have RNA binding, flap-structured DNA binding activity, role in nuclear-transcribed mRNA poly(A) tail shortening, positive regulation of endodeoxyribonuclease activity and P-body, cytosol, nucleus localization
141	Q6FMA3	CAGL0K09724g	FPR1	FPR1	12.15	2	2	2	2		Peptidyl-prolyl cis-trans isomerase (PPIase), binds to the drugs FK506 and rapamycin; also binds to the nonhistone chromatin binding protein Hmo1p and may regulate its assembly or function	Peptidyl-prolyl cis-trans isomerase; expression upregulated in biofilm vs planktonic cell culture
142	Q6FMB9	CAGL0K09328g	THR4	THR4	57.45	10	12	7	9		Threonine synthase, conserved protein that catalyzes formation of threonine from O-phosphohomoserine; expression is regulated by the GCN4-mediated general amino acid control pathway	Threonine synthase
143	Q6FMF2	CAGL0K08536g	APE1	APE1	56.97	4	4	3	4		Vacuolar aminopeptidase yscI; zinc metalloproteinase that belongs to the peptidase family M18; often used as a marker protein in studies of autophagy and cytosol to vacuole targeting (CVT) pathway	Vacuolar aminopeptidase I
144	Q6FMF8	CAGL0K08382g		RPS21A	9.72	8	77	7	66		Protein component of the small (40S) ribosomal subunit; nearly identical to Rps21Bp and has similarity to rat S21 ribosomal protein	Ortholog(s) have structural constituent of ribosome activity
145	Q6FMG2	CAGL0K08294g		DYN1	467.88	1	22	2	24		Cytoplasmic heavy chain dynein, microtubule motor protein, required for anaphase spindle elongation; involved in spindle assembly, chromosome movement, and spindle orientation during cell division, targeted to microtubule tips by Pac1p	Ortholog(s) have ATP binding, ATP-dependent microtubule motor activity, minus-end-directed activity
146	Q6FMI3	CAGL0D01188g	TEF1	TEF1	49.82	15	39	14	42		Translational elongation factor EF-1 alpha; also encoded by TEF2; functions in the binding reaction of aminoacyl-tRNA (AA-tRNA) to ribosomes; may also have a role in tRNA re-export from the nucleus	Translation elongation factor eEF1 alpha-A chain
147	Q6FMJ3	CAGL0K07590g	MYO3	MYO3	141.51	2	3	5	5		One of two type I myosins; localizes to actin cortical patches; deletion of MYO3 has little effect on growth, but myo3 myo5 double deletion causes severe defects in growth and actin cytoskeleton organization	Putative myosin
148	Q6FMJ5 #	CAGL0K07546g	PMU2	PMU2	37.46	21	46	18	53			Putative phosphate starvation inducible acid phosphatase; contains a phosphomutase-like domain; functionally complements a S. cerevisiae pho5 mutant; transcript abundance during phosphate starvation regulated by Pho4p
149	Q6FMJ6 #	CAGL0K07524g	PMU1	PMU1	37.58	8	10	9	11		Putative phosphomutase, contains a region homologous to the active site of phosphomutases; overexpression suppresses the histidine auxotrophy of an ade3 ade16 ade17 triple mutant and the temperature sensitivity of a tps2 mutant	Protein with a phosphomutase-like domain
150	Q6FMK1	CAGL0K07414g		RPL20A	20.73	5	5	7	7		Protein component of the large (60S) ribosomal subunit, nearly identical to Rpl20Bp and has similarity to rat L18a ribosomal protein	Ortholog(s) have cytosolic large ribosomal subunit localization
151	Q6FMK5	CAGL0K07293g		FAA4	77.09	10	10	7	11		Long chain fatty acyl-CoA synthetase, activates imported fatty acids with a preference for C12:0-C16:0 chain lengths; functions in long chain fatty acid import; important for survival during stationary phase; localized to lipid particles	Ortholog(s) have long-chain fatty acid-CoA ligase activity and role in long-chain fatty acid import, long-chain fatty-acyl-CoA metabolic process, sphingoid long-chain base transport
152	Q6FMN0	CAGL0K06699g		SDS24	59.04	3	4	3	3		One of two S. cerevisiae homologs (Sds23p and Sds24p) of the S. pombe Sds23 protein, which is implicated in APC/cyclosome regulation; involved in cell separation during budding; may play an indirect role in fluid-phase endocytosis	Ortholog(s) have protein serine/threonine phosphatase inhibitor activity
153	Q6FMN5	CAGL0K06567g		RPL27B	15.55	6	6	4	6		Protein component of the large (60S) ribosomal subunit, nearly identical to Rpl27Ap and has similarity to rat L27 ribosomal protein	Ortholog(s) have preribosome, large subunit precursor localization
154	Q6FMP8	CAGL0K06281g		GUK1	20.41	3	3	5	6		Guanylate kinase, converts GMP to GDP; required for growth and mannose outer chain elongation of cell wall N-linked glycoproteins	Ortholog(s) have guanylate kinase activity, role in GDP biosynthetic process, GMP metabolic process and fungal biofilm matrix localization
155	Q6FMP9	CAGL0K06259g	TSA1	TSA2	21.85	5	7	4	5		Stress inducible cytoplasmic thioredoxin peroxidase; cooperates with Tsa1p in the removal of reactive oxygen, nitrogen and sulfur species using thioredoxin as hydrogen donor; deletion enhances the mutator phenotype of tsa1 mutants	Thiol-specific antioxidant protein; predicted thioredoxin peroxidase involved in oxidative stress response; protein abundance decreased in ace2 mutant cells
156	Q6FMQ4	CAGL0K06149g		RPS17B	15.8	9	18	8	16		Ribosomal protein 51 (rp51) of the small (40s) subunit; nearly identical to Rps17Ap and has similarity to rat S17 ribosomal protein	Ortholog(s) have role in ribosomal small subunit assembly
157	Q6FMR2	CAGL0K05973g	HSP60	HSP60	60.35	3	3	3	3		Tetradecameric mitochondrial chaperonin required for ATP-dependent folding of precursor polypeptides and complex assembly; prevents aggregation and mediates protein refolding after heat shock; role in mtDNA transmission; phosphorylated	Heat shock protein 60, mitochondrial precursor; putative chaperonin
158	Q6FMR8	CAGL0K05753g		GNP1	73.02	7	13	7	13		High-affinity glutamine permease, also transports Leu, Ser, Thr, Cys, Met and Asn; expression is fully dependent on Grr1p and modulated by the Ssy1p-Ptr3p-Ssy5p (SPS) sensor of extracellular amino acids	Ortholog(s) have L-proline transmembrane transporter activity and role in amino acid transport, transmembrane transport
159	Q6FMR9	CAGL0K05731g		SMT3	12.19	5	8	6	11		Ubiquitin-like protein of the SUMO family, conjugated to lysine residues of target proteins; regulates chromatid cohesion, chromosome segregation, APC-mediated proteolysis, DNA replication and septin ring dynamics; phosphorylated at Ser2	Ortholog(s) have protein tag activity
160	Q6FMS0	CAGL0K05709g		GIN4	124.58	2	2	2	2		Protein kinase involved in bud growth and assembly of the septin ring, proposed to have kinase-dependent and kinase-independent activities; undergoes autophosphorylation; similar to Kcc4p and Hsl1p	Ortholog(s) have phospholipid binding activity
161	Q6FMS7	CAGL0K05555g		BUD21	26.48	5	7	5	8		Component of small ribosomal subunit (SSU) processosome that contains U3 snoRNA; originally isolated as bud-site selection mutant that displays a random budding pattern	Ortholog(s) have snoRNA binding activity
162	Q6FMU4	CAGL0K05137g		ATH1	136.48	30	40	27	43		Acid trehalase required for utilization of extracellular trehalose	Ortholog(s) have alpha,alpha-trehalase activity and role in cellular response to desiccation, cellular response to ethanol, cellular response to freezing, pathogenesis, trehalose catabolic process
163	Q6FMW3	CAGL0K04719g		YNL208W	16.98	3	7	3	6		Protein of unknown function; may interact with ribosomes, based on co-purification experiments; authentic, non-tagged protein is detected in purified mitochondria in high-throughput studies; potential orthologs found in other fungi	Ortholog of S. cerevisiae : YNL208W, C. albicans SC5314 : C3_05710W_A/RCT1, C. dubliniensis CD36 : Cd36_85650, C. parapsilosis CDC317 : CPAR2_807040 and Candida tenuis NRRL Y-1498 : cten_CGOB_00040
164	Q6FMW8	CAGL0K04609g		VHT1	70.48	12	64	11	59		High-affinity plasma membrane H+-biotin (vitamin H) symporter; mutation results in fatty acid auxotrophy; 12 transmembrane domain containing major facilitator subfamily member; mRNA levels negatively regulated by iron deprivation and biotin	Has domain(s) with predicted role in transmembrane transport and integral component of membrane localization
165	Q6FMW9	CAGL0K04587g		RPS22A	14.64	4	4	4	5		Protein component of the small (40S) ribosomal subunit; nearly identical to Rps22Bp and has similarity to E. coli S8 and rat S15a ribosomal proteins	Has domain(s) with predicted structural constituent of ribosome activity, role in translation and ribosome localization
166	Q6FMY5	CAGL0K04235g		NQM1	36.77	9	14	8	15		Transaldolase of unknown function; transcription is repressed by Mot1p and induced by alpha-factor and during diauxic shift	Putative transaldolase
167	Q6FMZ0	CAGL0K04125g		ACB1	10.09	9	16	7	14		Acyl-CoA-binding protein, transports newly synthesized acyl-CoA esters from fatty acid synthetase (Fas1p-Fas2p) to acyl-CoA-consuming processes; subject to starvation-induced, Grh1p-mediated unconventional secretion	Ortholog(s) have long-chain fatty acyl-CoA binding activity, role in chronological cell aging, very long-chain fatty acid biosynthetic process and extracellular region, nucleus localization
168	Q6FMZ3	CAGL0K04037g	FKS2	GSC2	217.47	25	37	23	48		Catalytic subunit of 1,3-beta-glucan synthase, involved in formation of the inner layer of the spore wall; activity positively regulated by Rho1p and negatively by Smk1p; has similarity to an alternate catalytic subunit, Fks1p (Gsc1p)	Putative 1,3-beta-glucan synthase component; functionally redundant with Fks1p; "hot spot" mutations in FKS2 confer resistance to echinocandins
169	Q6FN18	CAGL0K03487g		MYO5	135.75	11	11	11	11		One of two type I myosins; contains proline-rich tail homology 2 (TH2) and SH3 domains; MYO5 deletion has little effect on growth, but myo3 myo5 double deletion causes severe defects in growth and actin cytoskeleton organization	Ortholog(s) have actin filament binding, actin-dependent ATPase activity, microfilament motor activity
170	Q6FN26	CAGL0K03289g		YMR099C	33.4	7	8	8	8		Glucose-6-phosphate 1-epimerase (hexose-6-phosphate mutarotase), likely involved in carbohydrate metabolism; GFP-fusion protein localizes to both the nucleus and cytoplasm and is induced in response to the DNA-damaging agent MMS	Aldose 1-epimerase
171	Q6FN33	CAGL0K03135g		RPS20	13.55	8	10	7	8		Protein component of the small (40S) ribosomal subunit; overproduction suppresses mutations affecting RNA polymerase III-dependent transcription; has similarity to E. coli S10 and rat S20 ribosomal proteins	Ortholog(s) have role in maturation of SSU-rRNA from tricistronic rRNA transcript (SSU-rRNA, 5.8S rRNA, LSU-rRNA) and cytosolic small ribosomal subunit, hyphal cell wall, yeast-form cell wall localization
172	Q6FN71	CAGL0K02255g		RSP5	92.58	2	2	4	5		E3 ubiquitin ligase of the NEDD4 family; involved in regulating many cellular processes including MVB sorting, heat shock response, transcription, endocytosis, and ribosome stability; human homolog is involved in Liddle syndrome; mutant tolerates aneuploidy	Ortholog(s) have phosphatidylinositol binding, ubiquitin binding, ubiquitin protein ligase activity
173	Q6FN77	CAGL0K02123g		RPS26B	13.51	2	6	3	6		Protein component of the small (40S) ribosomal subunit; nearly identical to Rps26Ap and has similarity to rat S26 ribosomal protein	Ortholog(s) have role in rRNA export from nucleus, ribosome assembly
174	Q6FNB1 #$	CAGL0K01353g		NPC2	20.1	3	6	3	6		Functional homolog of human NPC2/He1, which is a cholesterol-binding protein whose deficiency causes Niemann-Pick type C2 disease involving retention of cholesterol in lysosomes	Ortholog(s) have role in intracellular sterol transport and extracellular region, fungal-type vacuole lumen localization
175	Q6FND5	CAGL0K00803g	TRX2	TRX1	11.16	16	623	16	580		Cytoplasmic thioredoxin isoenzyme of the thioredoxin system which protects cells against oxidative and reductive stress, forms LMA1 complex with Pbi2p, acts as a cofactor for Tsa1p, required for ER-Golgi transport and vacuole inheritance	Protein described as thioredoxin involved in oxidative stress response; expression upregulated in biofilm vs planktonic cell culture
176	Q6FNE1	CAGL0K00671g		RPS14B	14.66	9	17	8	17		Ribosomal protein 59 of the small subunit, required for ribosome assembly and 20S pre-rRNA processing; mutations confer cryptopleurine resistance; nearly identical to Rps14Ap and similar to E. coli S11 and rat S14 ribosomal proteins	Ortholog(s) have small ribosomal subunit rRNA binding activity and role in maturation of SSU-rRNA from tricistronic rRNA transcript (SSU-rRNA, 5.8S rRNA, LSU-rRNA), ribosomal small subunit assembly
177	Q6FNH3	CAGL0J11682g		MIX17	16.79	1	2	1	3		Mitochondrial intermembrane space protein, required for normal oxygen consumption; contains twin cysteine-x9-cysteine motifs	Ortholog(s) have role in aerobic respiration, development of symbiont in host and mitochondrial intermembrane space localization
178	Q6FNI1	CAGL0J11506g		CHS1	132.9	9	9	14	15		Chitin synthase I, requires activation from zymogenic form in order to catalyze the transfer of N-acetylglucosamine (GlcNAc) to chitin; required for repairing the chitin septum during cytokinesis; transcription activated by mating factor	Ortholog(s) have chitin synthase activity, role in ascospore wall chitin biosynthetic process, cell separation after cytokinesis and cell septum, chitosome, plasma membrane localization
179	Q6FNJ4	CAGL0J11220g		RPS3	27.13	5	6	7	7		Protein component of the small (40S) ribosomal subunit, has apurinic/apyrimidinic (AP) endonuclease activity; essential for viability; has similarity to E. coli S3 and rat S3 ribosomal proteins	Ortholog(s) have DNA-(apurinic or apyrimidinic site) endonuclease activity, protein kinase A catalytic subunit binding, structural constituent of ribosome activity
180	Q6FNJ6	CAGL0J11176g		TDA7	67.31	7	10	7	13		Cell cycle-regulated gene of unknown function, promoter bound by Fkh2p; null mutant is sensitive to expression of the top1-T722A allele	Putative adhesin-like protein
181	Q6FNL3	CAGL0J10802g		NOP10	6.81	5	44	8	43		Constituent of small nucleolar ribonucleoprotein particles containing H/ACA-type snoRNAs, which are required for pseudouridylation and processing of pre-18S rRNA	Ortholog(s) have RNA binding activity, role in cleavage involved in rRNA processing, rRNA pseudouridine synthesis, snRNA pseudouridine synthesis and box H/ACA snoRNP complex localization
182	Q6FNN1	CAGL0J10384g		RPL28	16.67	3	3	2	2		Ribosomal protein of the large (60S) ribosomal subunit, has similarity to E. coli L15 and rat L27a ribosomal proteins; may have peptidyl transferase activity; can mutate to cycloheximide resistance	Ortholog(s) have RNA binding activity and cytosolic large ribosomal subunit, nucleus localization
183	Q6FNP2	CAGL0J10164g	RPL16A	RPL16B	22.48	2	6	6	9		N-terminally acetylated protein component of the large (60S) ribosomal subunit, binds to 5.8 S rRNA; has similarity to Rpl16Ap, E. coli L13 and rat L13a ribosomal proteins; transcriptionally regulated by Rap1p	Putative ribosomal protein
184	Q6FNQ3 #$	CAGL0J09922g		SUN4	44.07	13	483	10	439		Cell wall protein related to glucanases, possibly involved in cell wall septation; member of the SUN family	Ortholog(s) have glucan endo-1,3-beta-D-glucosidase activity
185	Q6FNQ6	CAGL0J09856g		MRPL36	20.18	3	3	2	2		Mitochondrial ribosomal protein of the large subunit; overproduction suppresses mutations in the COX2 leader peptide-encoding region	Ortholog(s) have structural constituent of ribosome activity, role in mitochondrial translation and mitochondrial large ribosomal subunit localization
186	Q6FNR7	CAGL0J09614g		NHP2	14.26	2	3	2	2		Nuclear protein related to mammalian high mobility group (HMG) proteins, essential for function of H/ACA-type snoRNPs, which are involved in 18S rRNA processing	Ortholog(s) have box H/ACA snoRNA binding activity, role in cleavage involved in rRNA processing, rRNA pseudouridine synthesis, snRNA pseudouridine synthesis and box H/ACA snoRNP complex localization
187	Q6FNS7	CAGL0J09372g		HNT1	16.19	3	3	4	4		Adenosine 5'-monophosphoramidase; interacts physically and genetically with Kin28p, a CDK and TFIIK subunit, and genetically with CAK1; member of the histidine triad (HIT) superfamily of nucleotide-binding proteins and similar to Hint	Ortholog(s) have adenosine 5'-monophosphoramidase activity and role in nucleotide metabolic process
188	Q6FNS8	CAGL0J09350g	CDC48	CDC48	91	3	3	4	4		ATPase involved in ubiquitin-mediated protein degradation; Cdc48p-Npl4p-Ufd1p complex participates in ER-associated degradation (ERAD) while Cdc48p-Npl4p-Vms1p complex participates in mitochondria-associated degradation (MAD); along with Npl4-Ufd1 complex, important for maintaining the cell wall integrity during heat stress to allow G1 progression	Putative microsomal protein of CDC48/PAS1/SEC18 family of ATPases
189	Q6FNT7	CAGL0J09152g		RDI1	22.96	4	4	3	3		Rho GDP dissociation inhibitor involved in the localization and regulation of Cdc42p and Rho1p	Ortholog(s) have Rho GDP-dissociation inhibitor activity
190	Q6FNU0	CAGL0J09086g		RPL35B	14.11	10	41	8	47		Protein component of the large (60S) ribosomal subunit, identical to Rpl35Ap and has similarity to rat L35 ribosomal protein	Ortholog(s) have role in maturation of LSU-rRNA from tricistronic rRNA transcript (SSU-rRNA, 5.8S rRNA, LSU-rRNA) and cytosolic large ribosomal subunit, preribosome, large subunit precursor localization
191	Q6FNX2	CAGL0J08349g		CAF120	110.03	11	14	12	15		Part of the evolutionarily-conserved CCR4-NOT transcriptional regulatory complex involved in controlling mRNA initiation, elongation, and degradation	Ortholog(s) have role in regulation of transcription by RNA polymerase II
192	Q6FNY0	CAGL0J08184g		ALP1	63.41	3	5	3	5		Arginine transporter; expression is normally very low and it is unclear what conditions would induce significant expression	Ortholog(s) have basic amino acid transmembrane transporter activity and role in basic amino acid transport
193	Q6FNY1	CAGL0J08162g		LYP1	66.31	9	15	8	18		Lysine permease; one of three amino acid permeases (Alp1p, Can1p, Lyp1p) responsible for uptake of cationic amino acids	Ortholog(s) have basic amino acid transmembrane transporter activity, role in basic amino acid transport and eisosome localization
194	Q6FP03	CAGL0J07678g		SUI1	12.22	4	4	3	3		Translation initiation factor eIF1; component of a complex involved in recognition of the initiator codon; modulates translation accuracy at the initiation phase	Ortholog(s) have ribosomal small subunit binding, translation initiation factor activity, translation initiation factor binding activity and role in formation of translation preinitiation complex, maintenance of translational fidelity
195	Q6FP14	CAGL0J07436g	PDR16	PDR16	39.96	2	2	3	3		Phosphatidylinositol transfer protein (PITP) controlled by the multiple drug resistance regulator Pdr1p, localizes to lipid particles and microsomes, controls levels of various lipids, may regulate lipid synthesis, homologous to Pdr17p	Putative ABC transporter
196	Q6FP23	CAGL0J07238g	RPS12	RPS12	15.52	5	5	6	6		Protein component of the small (40S) ribosomal subunit; has similarity to rat ribosomal protein S12	40S ribosomal protein S12; protein abundance decreased in ace2 mutant cells
197	Q6FP42	CAGL0J06820g		RNY1	49.64	3	3	3	3		Vacuolar RNase of the T(2) family, relocalizes to the cytosol where it cleaves tRNAs upon oxidative or stationary phase stress; promotes apoptosis under stress conditions and this function is independent of its catalytic activity	Ortholog(s) have endoribonuclease activity, role in RNA catabolic process, apoptotic process, cell morphogenesis and cytosol, extracellular region, fungal-type vacuole localization
198	Q6FP59	CAGL0J06402g		LYS20	47.57	3	3	3	3		Homocitrate synthase isozyme, catalyzes the condensation of acetyl-CoA and alpha-ketoglutarate to form homocitrate, which is the first step in the lysine biosynthesis pathway; highly similar to the other isozyme, Lys21p	Ortholog(s) have homocitrate synthase activity, role in DNA repair, histone displacement, lysine biosynthetic process via aminoadipic acid and nucleus localization
199	Q6FP60	CAGL0J06380g		INH1	10.81	3	4	2	3		Protein that inhibits ATP hydrolysis by the F1F0-ATP synthase; inhibitory function is enhanced by stabilizing proteins Stf1p and Stf2p; has similarity to Stf1p; has a calmodulin-binding motif and binds calmodulin in vitro	Ortholog(s) have ATPase inhibitor activity, role in negative regulation of ATPase activity and mitochondrion localization
200	Q6FP75 #$	CAGL0J06050g		YGP1	37.78	13	683	13	896		Cell wall-related secretory glycoprotein; induced by nutrient deprivation-associated growth arrest and upon entry into stationary phase; may be involved in adaptation prior to stationary phase entry; has similarity to Sps100p	Ortholog(s) have role in cell wall assembly and extracellular region localization
201	Q6FP76	CAGL0J06028g	MEP2	MEP2	54.22	2	2	2	2		Ammonium permease involved in regulation of pseudohyphal growth; belongs to a ubiquitous family of cytoplasmic membrane proteins that transport only ammonium (NH4+); expression is under the nitrogen catabolite repression regulation	Ortholog(s) have high-affinity secondary active ammonium transmembrane transporter activity
202	Q6FPB5	CAGL0J05126g	BNA3	BNA3	49.27	4	4	5	5		Kynurenine aminotransferase, catalyzes formation of kynurenic acid from kynurenine; potential Cdc28p substrate	Ortholog(s) have 2-aminoadipate transaminase activity, kynurenine-oxoglutarate transaminase activity, role in kynurenic acid biosynthetic process and mitochondrion localization
203	Q6FPB9	CAGL0J05038g		YJL055W	23.54	3	3	3	3		Putative protein of unknown function, proposed to be involved in the metabolism of purine and pyrimidine base analogues; deletion mutants are sensitive to HAP and AHA; overexpression confers resistance to 5-FOA and 5-FU	Ortholog(s) have role in response to purine-containing compound
204	Q6FPD7	CAGL0J04620g		RPN13	17.24	4	4	2	2		Subunit of the 19S regulatory particle of the 26S proteasome lid; acts as a ubiquitin receptor for the proteasome; null mutants accumulate ubiquitinated Gcn4p and display decreased 26S proteasome stability	Ortholog(s) have ubiquitin binding activity, role in ubiquitin-dependent protein catabolic process and proteasome regulatory particle, lid subcomplex, proteasome storage granule localization
205	Q6FPE4 #$	CAGL0J04466g		PUN1	29.29	5	21	7	23		Plasma membrane protein with a role in cell wall integrity; co-localizes with Sur7p in punctate membrane patches; null mutant displays decreased thermotolerance; transcription induced upon cell wall damage and metal ion stress	Ortholog(s) have role in fungal-type cell wall organization, protein complex oligomerization and cell cortex of cell tip, membrane raft, plasma membrane localization
206	Q6FPF6	CAGL0J04202g	HSP12	HSP12	11.17	6	8	5	6		Plasma membrane protein involved in maintaining membrane organization in stress conditions; induced by heat shock, oxidative stress, osmostress, stationary phase, glucose depletion, oleate and alcohol; regulated by HOG and Ras-Pka pathways	Heat shock protein; gene is upregulated in azole-resistant strain; expression upregulated in biofilm vs planktonic cell culture
207	Q6FPH5	CAGL0J03780g		ABP140	60.42	1	2	1	2		AdoMet-dependent tRNA methyltransferase and actin binding protein; C-terminal domain is responsible for 3-methylcytidine modification of residue 32 of the tRNA anticodon loop of tRNA-Thr and tRNA-Ser and contains an S-adenosylmethionine (AdoMet) binding motif; N-terminal actin binding sequence interacts with actin filaments and localizes to actin patches and cables; N- and C-terminal domains are …	Ortholog(s) have actin filament binding, protein binding, bridging, tRNA (cytosine-3-)-methyltransferase activity and role in actin filament bundle assembly, tRNA methylation
208	Q6FPJ9	CAGL0J03234g		RPS24A	15.34	9	29	9	34		Protein component of the small (40S) ribosomal subunit; identical to Rps24Bp and has similarity to rat S24 ribosomal protein	Ortholog(s) have role in maturation of SSU-rRNA from tricistronic rRNA transcript (SSU-rRNA, 5.8S rRNA, LSU-rRNA)
209	Q6FPN3	CAGL0J02442g		TIM44	46.41	3	3	3	3		Essential component of the Translocase of the Inner Mitochondrial membrane (TIM23 complex); tethers the import motor and regulatory factors (PAM complex) to the translocation channel (Tim23p-Tim17p core complex)	Ortholog(s) have chaperone binding, protein binding, bridging activity, role in protein import into mitochondrial matrix and PAM complex, Tim23 associated import motor, plasma membrane localization
210	Q6FPN5	CAGL0J02398g		HIS6	29.17	6	7	7	7		Phosphoribosyl-5-amino-1-phosphoribosyl-4-imidazolecarboxiamide isomerase, catalyzes the fourth step in histidine biosynthesis; mutations cause histidine auxotrophy and sensitivity to Cu, Co, and Ni salts	Ortholog(s) have 1-(5-phosphoribosyl)-5-[(5-phosphoribosylamino)methylideneamino]imidazole-4-carboxamide isomerase activity and role in histidine biosynthetic process
211	Q6FPN7	CAGL0J02354g		RPL2B	27.32	8	36	9	36		Protein component of the large (60S) ribosomal subunit, identical to Rpl2Ap and has similarity to E. coli L2 and rat L8 ribosomal proteins; expression is upregulated at low temperatures	Ortholog(s) have structural constituent of ribosome activity, role in cytoplasmic translation and cytosolic large ribosomal subunit localization
212	Q6FPR9 #$	CAGL0J01463g		CWP1	25.5	4	11	4	11	Yes		Putative GPI-linked cell wall protein
213	Q6FPS1	CAGL0J01419g		SEG1	110.06	9	11	11	13		Component of the eisosome with unknown function; may interact with ribosomes, based on co-purification experiments; GFP-fusion protein localizes to the cell periphery; expression is repressed by cAMP; similar to A. gossypii SEG gene which is important for stabilizing eisosomes	Ortholog(s) have role in eisosome assembly and eisosome localization
214	Q6FPS5	CAGL0J01331g		YMR090W	24.81	2	2	2	2		Putative protein of unknown function with similarity to DTDP-glucose 4,6-dehydratases; GFP-fusion protein localizes to the cytoplasm; up-regulated in response to the fungicide mancozeb; not essential for viability	Ortholog of S. cerevisiae : YMR090W, C. albicans SC5314 : CR_00090C_A, C. dubliniensis CD36 : Cd36_25110, C. parapsilosis CDC317 : CPAR2_800610 and Debaryomyces hansenii CBS767 : DEHA2D18898g
215	Q6FPV0	CAGL0J00737g		RPS27B	8.87	3	22	3	18		Protein component of the small (40S) ribosomal subunit; nearly identical to Rps27Ap and has similarity to rat S27 ribosomal protein	Ortholog(s) have structural constituent of ribosome activity
216	Q6FPV8	CAGL0J00561g		YHI9	32.29	3	3	3	3		Protein of unknown function; null mutant is defective in unfolded protein response; possibly involved in a membrane regulation metabolic pathway; member of the PhzF superfamily, though most likely not involved in phenazine production	Ortholog(s) have role in endoplasmic reticulum unfolded protein response
217	Q6FPW1	CAGL0J00495g		ERC1	73.42	2	2	3	4		Member of the multi-drug and toxin extrusion (MATE) family of the multidrug/oligosaccharidyl-lipid/polysaccharide (MOP) exporter superfamily; overproduction confers ethionine resistance and accumulation of S-adenosylmethionine	Ortholog(s) have role in S-adenosylmethionine biosynthetic process
218	Q6FPX5	CAGL0J00165g		RPS25A	11.94	4	10	5	11		Protein component of the small (40S) ribosomal subunit; nearly identical to Rps25Bp and has similarity to rat S25 ribosomal protein	Ortholog(s) have structural constituent of ribosome activity and cytosolic small ribosomal subunit localization
219	Q6FPZ1	CAGL0I10648g	ASN2	ASN2	64.67	4	5	3	3		Asparagine synthetase, isozyme of Asn1p; catalyzes the synthesis of L-asparagine from L-aspartate in the asparagine biosynthetic pathway	Putative asparagine synthetase; protein abundance increased in ace2 mutant cells
220	Q6FPZ7	CAGL0I10516g		YGR130C	93.32	2	4	4	5		Component of the eisosome with unknown function; GFP-fusion protein localizes to the cytoplasm; specifically phosphorylated in vitro by mammalian diphosphoinositol pentakisphosphate (IP7)	Ortholog(s) have role in fungal-type cell wall organization, pathogenesis and eisosome, integral component of plasma membrane, membrane raft localization
221	Q6FPZ8 #	CAGL0I10494g		FHN1	19.01	3	4	3	4		Protein of unknown function; induced by ketoconazole; promoter region contains sterol regulatory element motif, which has been identified as a Upc2p-binding site; overexpression complements function of Nce102p in NCE102 deletion strain	Ortholog(s) have role in eisosome assembly, plasma membrane organization, protein localization to plasma membrane and eisosome, growing cell tip, membrane raft, plasma membrane localization
222	Q6FQ03	CAGL0I10384g	TPO3	TPO2	70.02	6	6	3	3		Polyamine transport protein specific for spermine; localizes to the plasma membrane; transcription of TPO2 is regulated by Haa1p; member of the major facilitator superfamily	Predicted polyamine transporter of the major facilitator superfamily; required for azole resistance
223	Q6FQ17	CAGL0I09878g		FAA1	77.57	14	16	16	19		Long chain fatty acyl-CoA synthetase, activates imported fatty acids with a preference for C12:0-C16:0 chain lengths; functions in long chain fatty acid import; accounts for most acyl-CoA synthetase activity; localized to lipid particles	Ortholog(s) have medium-chain fatty acid-CoA ligase activity, myristoyl-CoA ligase activity, oleoyl-CoA ligase activity, palmitoyl-CoA ligase activity
224	Q6FQ39	CAGL0I09394g		SDH8	15.21	6	7	6	8		Putative protein of unknown function; the authentic, non-tagged protein is detected in highly purified mitochondria in high-throughput studies	Ortholog(s) have protein binding involved in protein folding activity, role in mitochondrial respiratory chain complex II assembly and mitochondrial matrix localization
225	Q6FQ58	CAGL0I08965g		LSB3	47.51	3	3	4	4		Protein containing a C-terminal SH3 domain; binds Las17p, which is a homolog of human Wiskott-Aldrich Syndrome protein involved in actin patch assembly and actin polymerization	Ortholog(s) have role in actin cortical patch localization
226	Q6FQ66	CAGL0I08767g		LSO2	10.14	2	2	3	4		Putative protein of unknown function	Ortholog(s) have role in iron ion homeostasis and nucleus localization
227	Q6FQ78	CAGL0I08459g	RHO1	RHO1	23.14	7	13	4	12		GTP-binding protein of the rho subfamily of Ras-like proteins, involved in establishment of cell polarity; regulates protein kinase C (Pkc1p) and the cell wall synthesizing enzyme 1,3-beta-glucan synthase (Fks1p and Gsc2p)	Ortholog(s) have G-protein beta-subunit binding, GTP binding, GTPase activity
228	Q6FQA4	CAGL0I07843g	ADH1	ADH1	37.52	14	42	17	44		Alcohol dehydrogenase, fermentative isozyme active as homo- or heterotetramers; required for the reduction of acetaldehyde to ethanol, the last step in the glycolytic pathway	Putative alcohol dehydrogenase isoenzyme III; increased protein abundance in azole resistant strain
229	Q6FQC2	CAGL0I07447g		ITR2	62.77	8	16	6	12		Myo-inositol transporter with strong similarity to the major myo-inositol transporter Itr1p, member of the sugar transporter superfamily; expressed constitutively	Ortholog(s) have myo-inositol transmembrane transporter activity, role in carbohydrate import across plasma membrane, myo-inositol transport and plasma membrane localization
230	Q6FQC5	CAGL0I07359g	INO4	INO4	15.24	1	3	1	3		Transcription factor required for derepression of inositol-choline-regulated genes involved in phospholipid synthesis; forms a complex, with Ino2p, that binds the inositol-choline-responsive element through a basic helix-loop-helix domain	Transcriptional regulator involved in de novo inositol biosynthesis; activator of INO1 gene expression; mutants unable to grow in the absence of inositol
231	Q6FQD4	CAGL0I07139g		LSC1	33.87	3	3	2	2		Alpha subunit of succinyl-CoA ligase, which is a mitochondrial enzyme of the TCA cycle that catalyzes the nucleotide-dependent conversion of succinyl-CoA to succinate; phosphorylated	Ortholog(s) have succinate-CoA ligase (ADP-forming) activity, role in succinyl-CoA metabolic process and mitochondrial nucleoid localization
232	Q6FQF1 #	CAGL0I06743g	FTR1	FTR1	46.07	8	11	8	14		High affinity iron permease involved in the transport of iron across the plasma membrane; forms complex with Fet3p; expression is regulated by iron	Putative ferrous iron transmembrane transporter involved in iron uptake
233	Q6FQH5 #$	CAGL0I06182g	PIR2	HSP150	34.6	9	178	9	168		O-mannosylated heat shock protein that is secreted and covalently attached to the cell wall via beta-1,3-glucan and disulfide bridges; required for cell wall stability; induced by heat shock, oxidative stress, and nitrogen limitation	Pir protein family member, putative cell wall component
234	Q6FQH6 #$	CAGL0I06160g	PIR4	CIS3	23.83	7	554	8	595		Mannose-containing glycoprotein constituent of the cell wall; member of the PIR (proteins with internal repeats) family	Pir protein family member, putative cell wall component
235	Q6FQI1	CAGL0I06050g	INO1	INO1	60.23	17	32	15	32		Inositol-3-phosphate synthase, involved in synthesis of inositol phosphates and inositol-containing phospholipids; transcription is coregulated with other phospholipid biosynthetic genes by Ino2p and Ino4p, which bind the UASINO DNA element	Putative inositol 1-phosphate synthase; regulated by the transcriptional activators Ino2p and Ino4p; protein differentially expressed in azole resistant strain
236	Q6FQI3	CAGL0I06006g		RPA34	27.61	2	2	4	4		RNA polymerase I subunit A34.5	Ortholog(s) have RNA polymerase I activity, role in nucleolar large rRNA transcription by RNA polymerase I, transcription elongation from RNA polymerase I promoter and RNA polymerase I complex localization
237	Q6FQL6	CAGL0I05236g	BCY1	BCY1	44.94	2	2	2	2		Regulatory subunit of the cyclic AMP-dependent protein kinase (PKA), a component of a signaling pathway that controls a variety of cellular processes, including metabolism, cell cycle, stress response, stationary phase, and sporulation	cAMP dependent protein kinase, regulatory subunit
238	Q6FQM7	CAGL0I04994g	MET6	MET6	85.81	46	110	39	91		Cobalamin-independent methionine synthase, involved in methionine biosynthesis and regeneration; requires a minimum of two glutamates on the methyltetrahydrofolate substrate, similar to bacterial metE homologs	5-methyltetrahydropteroyltriglutamate homocysteine methyltransferase; protein abundance increased in ace2 mutant cells
239	Q6FQN3	CAGL0I04862g	SNQ2	SNQ2	170.08	35	36	34	42		Plasma membrane ATP-binding cassette (ABC) transporter, multidrug transporter involved in multidrug resistance and resistance to singlet oxygen species	Predicted plasma membrane ATP-binding cassette (ABC) transporter, putative transporter involved in multidrug resistance; involved in Pdr1p-mediated azole resistance
240	Q6FQP1	CAGL0I04686g		ATP3	32.65	3	3	5	5		Gamma subunit of the F1 sector of mitochondrial F1F0 ATP synthase, which is a large, evolutionarily conserved enzyme complex required for ATP synthesis	Ortholog(s) have ATPase activity, proton-transporting ATP synthase activity, rotational mechanism, proton-transporting ATPase activity, rotational mechanism activity and role in ATP synthesis coupled proton transport
241	Q6FQQ2	CAGL0I04444g		ADE1	34.78	10	11	10	15		N-succinyl-5-aminoimidazole-4-carboxamide ribotide (SAICAR) synthetase, required for 'de novo' purine nucleotide biosynthesis; red pigment accumulates in mutant cells deprived of adenine	Ortholog(s) have phosphoribosylaminoimidazolesuccinocarboxamide synthase activity and role in 'de novo' IMP biosynthetic process, adenine biosynthetic process, fumarate metabolic process
242	Q6FQQ6	CAGL0I04356g	TIF1	TIF2	44.76	6	6	5	5		Translation initiation factor eIF4A, identical to Tif1p; DEA(D/H)-box RNA helicase that couples ATPase activity to RNA binding and unwinding; forms a dumbbell structure of two compact domains connected by a linker; interacts with eIF4G	Translation initiation factor eIF4A
243	Q6FQS0	CAGL0I04026g		PBP4	16.05	5	13	7	23		Pbp1p binding protein, interacts strongly with Pab1p-binding protein 1 (Pbp1p) in the yeast two-hybrid system; also interacts with Lsm12p in a copurification assay	Ortholog(s) have cytoplasmic stress granule localization
244	Q6FQS5	CAGL0I03916g		ARF2	20.64	5	6	5	6		ADP-ribosylation factor, GTPase of the Ras superfamily involved in regulation of coated formation vesicles in intracellular trafficking within the Golgi; functionally interchangeable with Arf1p	Ortholog(s) have GTPase activity, role in cellular response to drug, filamentous growth, macroautophagy and Golgi apparatus, glyoxysome localization
245	Q6FQV2	CAGL0I03322g		ECM10	69.72	13	18	15	23		Heat shock protein of the Hsp70 family, localized in mitochondrial nucleoids, plays a role in protein translocation, interacts with Mge1p in an ATP-dependent manner; overexpression induces extensive mitochondrial DNA aggregations	Ortholog(s) have role in protein refolding, protein targeting to mitochondrion, spore germination and mitochondrial membrane, mitochondrial nucleoid localization
246	Q6FQV5	CAGL0I03234g		SNU13	13.67	2	3	2	3		RNA binding protein, part of U3 snoRNP involved in rRNA processing, part of U4/U6-U5 tri-snRNP involved in mRNA splicing, similar to human 15.5K protein	Ortholog(s) have U3 snoRNA binding, U4 snRNA binding activity and role in mRNA splicing, via spliceosome, maturation of SSU-rRNA from tricistronic rRNA transcript (SSU-rRNA, 5.8S rRNA, LSU-rRNA)
247	Q6FQX6	CAGL0I02706g		MRPL33	9.87	4	5	6	6		mitochondrial ribosomal protein of the large subunit	Ortholog(s) have structural constituent of ribosome activity and mitochondrial large ribosomal subunit localization
248	Q6FQY4	CAGL0I02486g	ENO1	ENO2	46.71	22	95	25	101		Enolase II, a phosphopyruvate hydratase that catalyzes the conversion of 2-phosphoglycerate to phosphoenolpyruvate during glycolysis and the reverse reaction during gluconeogenesis; expression is induced in response to glucose	Putative enolase I; protein abundance increased in azole resistant strain and in ace2 mutant cells
249	Q6FQZ7	CAGL0I02200g	SOL3	SOL3	27.54	4	4	4	4		6-phosphogluconolactonase, catalyzes the second step of the pentose phosphate pathway; weak multicopy suppressor of los1-1 mutation; homologous to Sol2p and Sol1p	Putative 6-phosphogluconolactonase
250	Q6FR10	CAGL0I01914g		SPO12	15.77	1	4	1	3		Nucleolar protein of unknown function, positive regulator of mitotic exit; involved in regulating release of Cdc14p from the nucleolus in early anaphase, may play similar role in meiosis	Ortholog(s) have role in meiosis I, mitotic cell cycle, positive regulation of exit from mitosis and nucleolus localization
251	Q6FR25	CAGL0I01496g		SSC1	69.86	2	2	2	2		High affinity Ca2+/Mn2+ P-type ATPase required for Ca2+ and Mn2+ transport into Golgi; involved in Ca2+ dependent protein sorting and processing; mutations in human homolog ATP2C1 cause acantholytic skin condition Hailey-Hailey disease	Ortholog(s) have ATPase activity, enzyme regulator activity and role in positive regulation of endodeoxyribonuclease activity, protein import into mitochondrial matrix, protein refolding, protein unfolding
252	Q6FR36 #$	CAGL0I01232g		ERP5	24.07	2	2	3	3		Protein with similarity to Emp24p and Erv25p, member of the p24 family involved in ER to Golgi transport	Has domain(s) with predicted role in transport and integral component of membrane localization
253	Q6FR39	CAGL0I01166g	TRR1	TRR2	34.36	6	7	5	6		Mitochondrial thioredoxin reductase involved in protection against oxidative stress, required with Glr1p to maintain the redox state of Trx3p; contains active-site motif (CAVC) present in prokaryotic orthologs; binds NADPH and FAD	Thioredoxin reductase (NADPH)
254	Q6FR42	CAGL0I01100g	GCY1	GCY1	34.92	3	3	7	8		Putative NADP(+) coupled glycerol dehydrogenase, proposed to be involved in an alternative pathway for glycerol catabolism; also has mRNA binding activity; member of the aldo-keto reductase (AKR) family	Ortholog(s) have alditol:NADP+ 1-oxidoreductase activity, glycerol dehydrogenase [NAD(P)+] activity, mRNA binding activity
255	Q6FR43	CAGL0I01078g	PFY1	PFY1	13.72	2	3	1	2		Profilin, binds actin, phosphatidylinositol 4,5-bisphosphate, and polyproline regions; involved in cytoskeleton organization; required for normal timing of actin polymerization in response to thermal stress	Profilin
256	Q6FR56	CAGL0I00792g		RPS16A	15.8	5	5	5	5		Protein component of the small (40S) ribosomal subunit; identical to Rps16Bp and has similarity to E. coli S9 and rat S16 ribosomal proteins	Ortholog(s) have role in maturation of SSU-rRNA from tricistronic rRNA transcript (SSU-rRNA, 5.8S rRNA, LSU-rRNA)
257	Q6FR65	CAGL0I00594g		GSP1	24.33	3	3	2	2		Ran GTPase, GTP binding protein (mammalian Ranp homolog) involved in the maintenance of nuclear organization, RNA processing and transport; regulated by Srm1p, Rna1p, Yrb1p, Yrb2p, Yrp4p, Yrb30p, Cse1p and Kap95p; yeast Gsp2p homolog	Ortholog(s) have GTP binding, GTPase activity, Ran guanyl-nucleotide exchange factor activity
258	Q6FR70 #$	CAGL0I00484g		EXG1	51.13	30	246	30	268		Major exo-1,3-beta-glucanase of the cell wall, involved in cell wall beta-glucan assembly; exists as three differentially glycosylated isoenzymes	Ortholog(s) have cell adhesion molecule binding, glucan endo-1,6-beta-glucosidase activity, glucan exo-1,3-beta-glucosidase activity
259	Q6FR82 #$	CAGL0I00220g	EPA23	EPA23	94.46	3	3	3	4	Yes		Predicted GPI-linked adhesin-like protein; belongs to adhesin cluster I
260	Q6FRA9	CAGL0H10076g		YRO2	35.73	2	4	2	3		Protein of unknown function with similarity to archaeal rhodopsins; the authentic, non-tagged protein is detected in a phosphorylated state in highly purified mitochondria in high-throughput studies; transcriptionally regulated by Haa1p	Ortholog(s) have plasma membrane localization
261	Q6FRB1	CAGL0H10032g	PST2	RFS1	21.13	5	7	4	4		Protein of unknown function; member of a flavodoxin-like fold protein family that includes Pst2p and Ycp4p; green fluorescent protein (GFP)-fusion protein localizes to the cytoplasm in a punctate pattern	Ortholog(s) have cytoplasm, membrane raft localization
262	Q6FRB7	CAGL0H09878g	IPP1	IPP1	32.29	14	24	16	21		Cytoplasmic inorganic pyrophosphatase (PPase), homodimer that catalyzes the rapid exchange of oxygens from Pi with water, highly expressed and essential for viability, active-site residues show identity to those from E. coli PPase	Inorganic pyrophosphatase, cytoplasmic
263	Q6FRC6	CAGL0H09658g		NTF2	14.33	4	4	2	2		Nuclear envelope protein, interacts with GDP-bound Gsp1p and with proteins of the nuclear pore to transport Gsp1p into the nucleus where it is an essential player in nucleocytoplasmic transport	Ortholog(s) have Ran GTPase binding activity, role in protein import into nucleus and nuclear envelope localization
264	Q6FRF1	CAGL0H09064g	FUR1	FUR1	24.48	8	8	5	5		Uracil phosphoribosyltransferase, synthesizes UMP from uracil; involved in the pyrimidine salvage pathway	Putative uracil phosphoribosyltransferase
265	Q6FRG1	CAGL0H08844g		DDR48	70.85	2	2	3	5		DNA damage-responsive protein, expression is increased in response to heat-shock stress or treatments that produce DNA lesions; contains multiple repeats of the amino acid sequence NNNDSYGS	Putative adhesin-like protein
266	Q6FRG6	CAGL0H08734g		RPL43A	10.1	3	134	4	139		Protein component of the large (60S) ribosomal subunit, identical to Rpl43Bp and has similarity to rat L37a ribosomal protein; null mutation confers a dominant lethal phenotype	Ortholog(s) have cytosolic large ribosomal subunit localization
267	Q6FRI3	CAGL0H08327g	TPI1	TPI1	26.85	13	24	12	25		Triose phosphate isomerase, abundant glycolytic enzyme; mRNA half-life is regulated by iron availability; transcription is controlled by activators Reb1p, Gcr1p, and Rap1p through binding sites in the 5' non-coding region	Putative triose-phosphate isomerase; protein abundance decreased in ace2 mutant cells
268	Q6FRI5	CAGL0H08283g	HSP10	HSP10	11.4	4	5	5	8		Mitochondrial matrix co-chaperonin that inhibits the ATPase activity of Hsp60p, a mitochondrial chaperonin; involved in protein folding and sorting in the mitochondria; 10 kD heat shock protein with similarity to E. coli groES	Ortholog(s) have chaperone binding, unfolded protein binding activity, role in chaperone-mediated protein complex assembly, protein import into mitochondrial intermembrane space, protein refolding and mitochondrial matrix localization
269	Q6FRK5	CAGL0H07843g	HAP2	HAP2	33.55	2	2	2	2		Subunit of the heme-activated, glucose-repressed Hap2p/3p/4p/5p CCAAT-binding complex, a transcriptional activator and global regulator of respiratory gene expression; contains sequences sufficient for both complex assembly and DNA binding	Ortholog(s) have RNA polymerase II proximal promoter sequence-specific DNA binding, proximal promoter DNA-binding transcription activator activity, RNA polymerase II-specific activity
270	Q6FRL7	CAGL0H07579g	HXK2	HXK2	53.63	7	8	5	6		Hexokinase isoenzyme 2 that catalyzes phosphorylation of glucose in the cytosol; predominant hexokinase during growth on glucose; functions in the nucleus to repress expression of HXK1 and GLK1 and to induce expression of its own gene	Putative hexokinase B
271	Q6FRM5 #$	CAGL0H07403g	KRE2	KRE2	54.08	2	2	2	2		Alpha1,2-mannosyltransferase of the Golgi involved in protein mannosylation	Ortholog(s) have alpha-1,2-mannosyltransferase activity
272	Q6FRM6	CAGL0H07381g		CWC21	16.55	3	3	3	4		Protein involved in RNA splicing by the spliceosome; component of a complex containing Cef1p; interacts genetically with ISY1 and BUD13; may bind RNA; has similarity to S. pombe Cwf21p	Ortholog(s) have role in mRNA splicing, via spliceosome and U2-type spliceosomal complex localization
273	Q6FRP3	CAGL0H07007g		PRE8	27.19	3	3	3	3		Alpha 2 subunit of the 20S proteasome	Ortholog(s) have role in proteasomal ubiquitin-independent protein catabolic process, proteasome-mediated ubiquitin-dependent protein catabolic process
274	Q6FRS2	CAGL0H06369g	CYS3	CYS3	42.15	12	14	12	18		Cystathionine gamma-lyase, catalyzes one of the two reactions involved in the transsulfuration pathway that yields cysteine from homocysteine with the intermediary formation of cystathionine	Ortholog(s) have cystathionine gamma-lyase activity and role in cysteine biosynthetic process via cystathionine, methionine biosynthetic process, transsulfuration
275	Q6FRT3	CAGL0H06127g		TIM9	10.12	1	3	2	8		Essential protein of the mitochondrial intermembrane space, forms a complex with Tim10p (TIM10 complex) that delivers hydrophobic proteins to the TIM22 complex for insertion into the inner membrane	Ortholog(s) have protein transporter activity, role in protein import into mitochondrial outer membrane, regulation of growth rate and mitochondrial intermembrane space protein transporter complex localization
276	Q6FRV2	CAGL0H05665g	GLR1	GLR1	52.47	3	3	3	3		Cytosolic and mitochondrial glutathione oxidoreductase, converts oxidized glutathione to reduced glutathione; mitochondrial but not cytosolic form has a role in resistance to hyperoxia	Predicted glutathione oxidoreductase involved in oxidative stress response
277	Q6FRV9	CAGL0H05511g		RPS9A	22.09	4	4	3	3		Protein component of the small (40S) ribosomal subunit; nearly identical to Rps9Bp and has similarity to E. coli S4 and rat S9 ribosomal proteins	Ortholog(s) have rRNA binding, structural constituent of ribosome activity and role in maturation of SSU-rRNA from tricistronic rRNA transcript (SSU-rRNA, 5.8S rRNA, LSU-rRNA)
278	Q6FRW1	CAGL0H05445g	PGI1	PGI1	61.27	22	28	22	28		Glycolytic enzyme phosphoglucose isomerase, catalyzes the interconversion of glucose-6-phosphate and fructose-6-phosphate; required for cell cycle progression and completion of the gluconeogenic events of sporulation	Glucose-6-phosphate isomerase
279	Q6FRX5	CAGL0H05137g		ALD6	54.2	7	8	3	3		Cytosolic aldehyde dehydrogenase, activated by Mg2+ and utilizes NADP+ as the preferred coenzyme; required for conversion of acetaldehyde to acetate; constitutively expressed; locates to the mitochondrial outer surface upon oxidative stress	Ortholog(s) have aldehyde dehydrogenase [NAD(P)+] activity, role in NADPH regeneration, acetate biosynthetic process, response to salt stress and cytosol, mitochondrion localization
280	Q6FS01	CAGL0H04565g		MRP21	17.06	2	2	2	2		Mitochondrial ribosomal protein of the small subunit; MRP21 exhibits genetic interactions with mutations in the COX2 and COX3 mRNA 5'-untranslated leader sequences	Ortholog(s) have structural constituent of ribosome activity, role in mitochondrial translational initiation and mitochondrial small ribosomal subunit localization
281	Q6FS03	CAGL0H04521g		RPL32	14.77	11	21	10	22		Protein component of the large (60S) ribosomal subunit, has similarity to rat L32 ribosomal protein; overexpression disrupts telomeric silencing	Ortholog(s) have structural constituent of ribosome activity, role in translation and cytosolic large ribosomal subunit localization
282	Q6FS11	CAGL0H04323g		ENT3	45.62	5	5	4	4		Protein containing an N-terminal epsin-like domain involved in clathrin recruitment and traffic between the Golgi and endosomes; associates with the clathrin adaptor Gga2p	Protein of unknown function
283	Q6FS17 #	CAGL0H04191g		ATP18	6.48	3	3	3	4		Subunit of the mitochondrial F1F0 ATP synthase, which is a large enzyme complex required for ATP synthesis; termed subunit I or subunit j; does not correspond to known ATP synthase subunits in other organisms	Ortholog(s) have proton-transporting ATP synthase activity, rotational mechanism activity and role in ATP synthesis coupled proton transport, mitochondrial proton-transporting ATP synthase complex assembly, protein complex oligomerization
284	Q6FS42	CAGL0H03641g		YNL010W	27.58	2	2	3	3		Putative protein of unknown function with similarity to phosphoserine phosphatases; green fluorescent protein (GFP)-fusion protein localizes to the cytoplasm and nucleus; homozygous diploid mutant shows an increase in glycogen accumulation	Ortholog(s) have glycerol-1-phosphatase activity
285	Q6FS53	CAGL0H03399g		HNM1	61.39	5	7	3	4		Choline/ethanolamine transporter; involved in the uptake of nitrogen mustard and the uptake of glycine betaine during hypersaline stress; co-regulated with phospholipid biosynthetic genes and negatively regulated by choline and myo-inositol	Ortholog(s) have (R)-carnitine transmembrane transporter activity, choline transmembrane transporter activity, ethanolamine transmembrane transporter activity
286	Q6FS79	CAGL0H02783g		NET1	194.56	4	4	5	6		Core subunit of the RENT complex, which is a complex involved in nucleolar silencing and telophase exit; stimulates transcription by RNA polymerase I and regulates nucleolar structure	Ortholog(s) have rDNA binding activity, role in chromatin silencing at rDNA, nucleolus organization, regulation of exit from mitosis and RENT complex localization
287	Q6FS90	CAGL0H02497g		GFD1	28.05	5	7	4	8		Coiled-coiled protein of unknown function, identified as a high-copy suppressor of a dbp5 mutation	Ortholog(s) have role in mRNA export from nucleus and cytoplasm, nuclear pore localization
288	Q6FSA1	CAGL0H02255g		RSN1	104.03	3	3	7	7		Membrane protein of unknown function; overexpression suppresses NaCl sensitivity of sro7 mutant cells by restoring sodium pump (Ena1p) localization to the plasma membrane	Ortholog(s) have role in Golgi to plasma membrane transport and membrane localization
289	Q6FSA8	CAGL0H02101g		RTC3	14.21	3	4	3	3		Protein of unknown function involved in RNA metabolism; has structural similarity to SBDS, the human protein mutated in Shwachman-Diamond Syndrome (the yeast SBDS ortholog = SDO1); null mutation suppresses cdc13-1 temperature sensitivity	Ortholog(s) have role in RNA metabolic process and fungal biofilm matrix localization
290	Q6FSB0	CAGL0H02057g		GAR1	22.52	4	4	4	4		Protein component of the H/ACA snoRNP pseudouridylase complex, involved in the modification and cleavage of the 18S pre-rRNA	Ortholog(s) have box H/ACA snoRNA binding activity, role in cellular response to drug, snRNA pseudouridine synthesis and box H/ACA snoRNP complex localization
291	Q6FSB9	CAGL0H01749g			12.37	2	3	3	4			Protein of unknown function
292	Q6FSC1 #$	CAGL0H01705g		FPR2	14.77	6	18	5	14		Membrane-bound peptidyl-prolyl cis-trans isomerase (PPIase), binds to the drugs FK506 and rapamycin; expression pattern suggests possible involvement in ER protein trafficking	Ortholog(s) have FK506 binding, Hsp70 protein binding, chaperone binding, peptidyl-prolyl cis-trans isomerase activity and membrane localization
293	Q6FSC9 #$	CAGL0H01529g	CPR5	CPR5	22.6	12	26	11	17		Peptidyl-prolyl cis-trans isomerase (cyclophilin) of the endoplasmic reticulum, catalyzes the cis-trans isomerization of peptide bonds N-terminal to proline residues; transcriptionally induced in response to unfolded proteins in the ER	Peptidyl-prolyl cis-trans isomerase; expression upregulated in biofilm vs planktonic cell culture
294	Q6FSD5	CAGL0H01397g		ATP5	22.2	5	5	3	3		Subunit 5 of the stator stalk of mitochondrial F1F0 ATP synthase, which is an evolutionarily conserved enzyme complex required for ATP synthesis; homologous to bovine subunit OSCP (oligomycin sensitivity-conferring protein); phosphorylated	Ortholog(s) have proton-transporting ATP synthase activity, rotational mechanism activity, role in ATP synthesis coupled proton transport and mitochondrial proton-transporting ATP synthase, stator stalk localization
295	Q6FSF3	CAGL0H00957g		SUI3	27.94	6	7	5	5		Beta subunit of the translation initiation factor eIF2, involved in the identification of the start codon; proposed to be involved in mRNA binding	Ortholog(s) have mRNA binding, translation initiation factor activity, translation initiation factor binding activity and role in formation of translation preinitiation complex
296	Q6FSH4	CAGL0H00506g	ATP2	ATP2	54.18	6	8	7	7		Beta subunit of the F1 sector of mitochondrial F1F0 ATP synthase, which is a large, evolutionarily conserved enzyme complex required for ATP synthesis; phosphorylated	F1F0-ATPase complex, F1 beta subunit; expression upregulated in biofilm vs planktonic cell culture; protein abundance decreased in ace2 mutant cells
297	Q6FSH6	CAGL0H00462g		RPS5	25.14	3	3	2	2		Protein component of the small (40S) ribosomal subunit, the least basic of the non-acidic ribosomal proteins; phosphorylated in vivo; essential for viability; has similarity to E. coli S7 and rat S5 ribosomal proteins	Ortholog(s) have structural constituent of ribosome activity, role in rRNA export from nucleus and cytosolic small ribosomal subunit, extracellular region, membrane localization
298	Q6FSJ2	CAGL0G10153g		QCR7	14.77	2	2	4	5		Subunit 7 of the ubiquinol cytochrome-c reductase complex, which is a component of the mitochondrial inner membrane electron transport chain; oriented facing the mitochondrial matrix; N-terminus appears to play a role in complex assembly	Ortholog(s) have mitochondrion localization
299	Q6FSJ3	CAGL0G10131g		QCR2	40.31	11	12	12	14		Subunit 2 of the ubiquinol cytochrome-c reductase complex, which is a component of the mitochondrial inner membrane electron transport chain; phosphorylated; transcription is regulated by Hap1p, Hap2p/Hap3p, and heme	Ortholog(s) have ubiquinol-cytochrome-c reductase activity and role in aerobic respiration, mitochondrial electron transport, ubiquinol to cytochrome c
300	Q6FSK2	CAGL0G09933g		SMX3	9.78	4	4	2	2		Core Sm protein Sm F; part of heteroheptameric complex (with Smb1p, Smd1p, Smd2p, Smd3p, Sme1p, and Smx2p) that is part of the spliceosomal U1, U2, U4, and U5 snRNPs; homolog of human Sm F	Ortholog(s) have poly(U) RNA binding, splicing factor binding activity and U1 snRNP, U2 snRNP, U4/U6 x U5 tri-snRNP complex, U5 snRNP, post-mRNA release spliceosomal complex localization
301	Q6FSL2	CAGL0G09713g		RPS30B	7.09	6	22	6	33		Protein component of the small (40S) ribosomal subunit; nearly identical to Rps30Ap and has similarity to rat S30 ribosomal protein	Has domain(s) with predicted structural constituent of ribosome activity, role in translation and ribosome localization
302	Q6FSM1 #$	CAGL0G09515g		SPR1	48.61	21	131	20	119		Sporulation-specific exo-1,3-beta-glucanase; contributes to ascospore thermoresistance	Ortholog(s) have glucan exo-1,3-beta-glucosidase activity, role in ascospore formation and ascospore wall localization
303	Q6FSM3 #$	CAGL0G09449g	CRH1	CRH1	47.95	17	350	17	390	Yes	Chitin transglycosylase that functions in the transfer of chitin to beta(1-6) and beta(1-3) glucans in the cell wall; similar and functionally redundant to Utr2; localizes to sites of polarized growth; expression induced by cell wall stress	Putative glycoside hydrolase; predicted GPI-anchor
304	Q6FSM4	CAGL0G09383g	TDH3	TDH3	35.87	30	133	25	118		Glyceraldehyde-3-phosphate dehydrogenase, isozyme 3, involved in glycolysis and gluconeogenesis; tetramer that catalyzes the reaction of glyceraldehyde-3-phosphate to 1,3 bis-phosphoglycerate; detected in the cytoplasm and cell wall	Putative glyceraldehyde-3-phosphate dehydrogenase; increased protein abundance in azole resistant strain; expression upregulated in biofilm vs planktonic cell culture; upregulated in hypoxia
305	Q6FSN6	CAGL0G09130g		RPL7B	27.56	4	6	3	6		Protein component of the large (60S) ribosomal subunit, nearly identical to Rpl7Ap and has similarity to E. coli L30 and rat L7 ribosomal proteins; contains a conserved C-terminal Nucleic acid Binding Domain (NDB2)	Ortholog(s) have role in maturation of LSU-rRNA and cytosolic large ribosomal subunit, nucleolus localization
306	Q6FSP2 #	CAGL0G08954g		YOL019W	66.37	13	17	13	17		Protein of unknown function; green fluorescent protein (GFP)-fusion protein localizes to the cell periphery and vacuole	Ortholog(s) have plasma membrane localization
307	Q6FSQ5 #$	CAGL0G08668g		SIM1	49.2	3	7	5	10		Protein of the SUN family (Sim1p, Uth1p, Nca3p, Sun4p) that may participate in DNA replication, promoter contains SCB regulation box at -300 bp indicating that expression may be cell cycle-regulated	Ortholog(s) have role in fungal-type cell wall organization and fungal-type cell wall localization
308	Q6FSR0	CAGL0G08558g		RHO3	25.25	4	5	3	4		Non-essential small GTPase of the Rho/Rac subfamily of Ras-like proteins involved in the establishment of cell polarity; GTPase activity positively regulated by the GTPase activating protein (GAP) Rgd1p	Ortholog(s) have GTP binding, GTPase activity
309	Q6FSR7	CAGL0G08360g	VPS34	VPS34	102.51	15	45	10	40		Phosphatidylinositol 3-kinase responsible for the synthesis of phosphatidylinositol 3-phosphate; forms membrane-associated signal transduction complex with Vps15p to regulate protein sorting; activated by the GTP-bound form of Gpa1p	Putative phosphoinositide 3-kinase involved in iron homeostasis
310	Q6FSS6	CAGL0G08173g		RPS31	17.12	7	85	4	62		Fusion protein that is cleaved to yield a ribosomal protein of the small (40S) subunit and ubiquitin; ubiquitin may facilitate assembly of the ribosomal protein into ribosomes; interacts genetically with translation factor eIF2B	Ortholog(s) have protein tag, structural constituent of ribosome activity and role in maturation of SSU-rRNA from tricistronic rRNA transcript (SSU-rRNA, LSU-rRNA,5S), protein ubiquitination, ribosomal small subunit assembly
311	Q6FST0	CAGL0G08085g		DNF2	179.52	21	22	23	24		Aminophospholipid translocase (flippase) that localizes primarily to the plasma membrane; contributes to endocytosis, protein transport and cell polarity; type 4 P-type ATPase	Ortholog(s) have phospholipid-translocating ATPase activity
312	Q6FST6	CAGL0G07953g		RSM19	10.29	2	2	2	2		Mitochondrial ribosomal protein of the small subunit, has similarity to E. coli S19 ribosomal protein	Ortholog(s) have structural constituent of ribosome activity and mitochondrial small ribosomal subunit localization
313	Q6FST7	CAGL0G07931g		MRPS12	16.46	4	5	5	7		Mitochondrial protein; may interact with ribosomes based on co-purification experiments; similar to E. coli and human mitochondrial S12 ribosomal proteins	Has domain(s) with predicted structural constituent of ribosome activity, role in translation and ribosome, small ribosomal subunit localization
314	Q6FST9 #$	CAGL0G07887g		VOA1	27.81	11	93	11	84		Endoplasmic reticulum protein that functions, together with other assembly factors, in assembly of the V0 sector of the vacuolar ATPase (V-ATPase); null mutation enhances the V-ATPase deficiency of a vma21 mutant impaired in ER retrieval	Ortholog(s) have role in cell separation after cytokinesis, cellular protein-containing complex assembly, endocytosis, fungal-type cell wall organization, hyphal growth, vacuole organization
315	Q6FSU9 #$	CAGL0G07667g		PRY1	27.04	6	35	6	40		Protein of unknown function	Ortholog(s) have cholesterol binding, magnesium ion binding activity, role in sterol transport and extracellular region localization
316	Q6FSV1 #$	CAGL0G07623g		APE3	62.16	6	9	6	8		Vacuolar aminopeptidase Y, processed to mature form by Prb1p	Ortholog(s) have aminopeptidase activity, role in protein catabolic process in the vacuole and extracellular region, fungal-type vacuole localization
317	Q6FSV5	CAGL0G07535g		RRS1	22.9	2	2	1	2		Arginyl-tRNA synthetase, proposed to be cytoplasmic but the authentic, non-tagged protein is detected in highly purified mitochondria in high-throughput studies	Ortholog(s) have single-stranded RNA binding activity
318	Q6FSW7	CAGL0G07271g		TSA1	21.49	4	5	4	9		Thioredoxin peroxidase, acts as both a ribosome-associated and free cytoplasmic antioxidant; self-associates to form a high-molecular weight chaperone complex under oxidative stress; deletion results in mutator phenotype	Putative thioredoxin peroxidase; protein differentially expressed in azole resistant strain
319	Q6FSW8	CAGL0G07249g		YOX1	38.12	3	3	3	3		Homeodomain-containing transcriptional repressor, binds to Mcm1p and to early cell cycle boxes (ECBs) in the promoters of cell cycle-regulated genes expressed in M/G1 phase; expression is cell cycle-regulated; potential Cdc28p substrate	Ortholog(s) have RNA polymerase II regulatory region sequence-specific DNA binding, transcriptional repressor activity, RNA polymerase II transcription factor binding activity
320	Q6FSW9	CAGL0G07227g		RPS18B	17.02	8	8	7	7		Protein component of the small (40S) ribosomal subunit; nearly identical to Rps18Ap and has similarity to E. coli S13 and rat S18 ribosomal proteins	Ortholog(s) have role in endonucleolytic cleavage in ITS1 to separate SSU-rRNA from 5.8S rRNA and LSU-rRNA from tricistronic rRNA transcript (SSU-rRNA, 5.8S rRNA, LSU-rRNA), rRNA export from nucleus and extracellular region localization
321	Q6FSX4	CAGL0G07106g	APT1	APT1	20.97	4	5	4	5		Acyl-protein thioesterase responsible for depalmitoylation of Gpa1p; green fluorescent protein (GFP)-fusion protein localizes to both the cytoplasm and nucleus and is induced in response to the DNA-damaging agent MMS	Putative adenine phosphoribosyltransferase; protein abundance decreased in ace2 mutant cells
322	Q6FSY4	CAGL0G06886g		TPH3	78.06	5	7	2	2		Putative protein of unknown function; GFP-fusion protein localizes to the cytoplasm; conserved in closely related Saccharomyces species	Protein of unknown function
323	Q6FSZ6	CAGL0G06622g		AVT4	81.39	3	3	2	2		Vacuolar transporter, exports large neutral amino acids from the vacuole; member of a family of seven S. cerevisiae genes (AVT1-7) related to vesicular GABA-glycine transporters	Protein of unknown function
324	Q6FT00	CAGL0G06490g		RPS7B	21.53	3	3	4	4		Protein component of the small (40S) ribosomal subunit, nearly identical to Rps7Ap; interacts with Kti11p; deletion causes hypersensitivity to zymocin; has similarity to rat S7 and Xenopus S8 ribosomal proteins	Ortholog(s) have role in ribosome biogenesis and small-subunit processome localization
325	Q6FT06	CAGL0G06358g		SNC1	12.67	6	6	4	4		Vesicle membrane receptor protein (v-SNARE) involved in the fusion between Golgi-derived secretory vesicles with the plasma membrane; proposed to be involved in endocytosis; member of the synaptobrevin/VAMP family of R-type v-SNARE proteins	Ortholog(s) have SNAP receptor activity and role in Golgi to plasma membrane transport, endocytosis, exocytosis, prospore membrane biogenesis, vesicle fusion
326	Q6FT15	CAGL0G06138g		YCK1	61.5	2	2	4	4		Palmitoylated plasma membrane-bound casein kinase I isoform; shares redundant functions with Yck2p in morphogenesis, proper septin assembly, endocytic trafficking; provides an essential function overlapping with that of Yck2p	Ortholog(s) have protein serine/threonine kinase activity and role in cell morphogenesis, conidium formation, endocytosis, glucose mediated signaling pathway, protein phosphorylation, regulation of growth rate
327	Q6FT17	CAGL0G06094g		IGO2	15.42	8	25	10	24		Protein required for initiation of G0 program; prevents degradation of nutrient-regulated mRNAs via the 5'-3' mRNA decay pathway; phosphorylated by Rim15p; GFP protein localizes to the cytoplasm and nucleus; similar to Igo1p	Ortholog(s) have role in negative regulation of nuclear-transcribed mRNA catabolic process, deadenylation-dependent decay and positive regulation of G1 to G0 transition, more
328	Q6FT21 #$	CAGL0G06006g		YHR138C	12.38	3	4	4	6		Putative protein of unknown function; has similarity to Pbi2p; double null mutant lacking Pbi2p and Yhr138p exhibits highly fragmented vacuoles	Ortholog(s) have endopeptidase inhibitor activity and role in vacuole fusion, non-autophagic
329	Q6FT24	CAGL0G05940g		RPL42B	12.13	2	3	2	4		Protein component of the large (60S) ribosomal subunit, identical to Rpl42Ap and has similarity to rat L44; required for propagation of the killer toxin-encoding M1 double-stranded RNA satellite of the L-A double-stranded RNA virus	Ortholog(s) have cytosolic large ribosomal subunit localization
330	Q6FT30	CAGL0G05808g		YDL211C	56.87	5	5	3	3		Putative protein of unknown function; green fluorescent protein (GFP)-fusion protein localizes to the vacuole	Putative adhesin-like protein
331	Q6FT39	CAGL0G05610g		DTD1	16.58	2	2	2	2		D-Tyr-tRNA(Tyr) deacylase, functions in protein translation, may affect nonsense suppression via alteration of the protein synthesis machinery; ubiquitous among eukaryotes	Ortholog(s) have D-leucyl-tRNA(Leu) deacylase activity, D-tyrosyl-tRNA(Tyr) deacylase activity and role in D-leucine catabolic process, D-tyrosine catabolic process, tRNA metabolic process
332	Q6FT42	CAGL0G05544g		HBT1	88.31	3	3	5	6		Substrate of the Hub1p ubiquitin-like protein that localizes to the shmoo tip (mating projection); mutants are defective for mating projection formation, thereby implicating Hbt1p in polarized cell morphogenesis	Ortholog(s) have role in cell morphogenesis involved in conjugation with cellular fusion and cell surface, fungal-type cell wall, mating projection localization
333	Q6FT64	CAGL0G05049g		AIM7	16.95	3	3	3	4		Protein that interacts with Arp2/3 complex to stimulate actin filament debranching and inhibit actin nucleation; has similarity to Cof1p and also to human glia maturation factor (GMF); null mutant displays elevated mitochondrial genome loss	Ortholog(s) have Arp2/3 complex binding activity, role in actin cortical patch assembly, actin filament debranching, negative regulation of Arp2/3 complex-mediated actin nucleation and actin cortical patch localization
334	Q6FT65	CAGL0G05027g		RPS13	17.05	6	6	5	5		Protein component of the small (40S) ribosomal subunit; has similarity to E. coli S15 and rat S13 ribosomal proteins	Ortholog(s) have small ribosomal subunit rRNA binding, structural constituent of ribosome activity and role in maturation of SSU-rRNA from tricistronic rRNA transcript (SSU-rRNA, 5.8S rRNA, LSU-rRNA)
335	Q6FT67	CAGL0G04983g		YLR363W-A	9.57	1	5	2	6		Putative protein of unknown function; green fluorescent protein (GFP)-fusion protein localizes to the nucleus	Ortholog of S. cerevisiae : YLR363W-A, C. albicans SC5314 : CR_04750W_A, C. dubliniensis CD36 : Cd36_30120, C. parapsilosis CDC317 : CPAR2_204060 and Candida tenuis NRRL Y-1498 : CANTEDRAFT_106929
336	Q6FT68	CAGL0G04961g		GRX8	12.62	4	4	3	3		Glutaredoxin that employs a dithiol mechanism of catalysis; monomeric; activity is low and null mutation does not affect sensitivity to oxidative stress; GFP-fusion protein localizes to the cytoplasm; expression strongly induced by arsenic	Ortholog(s) have glutathione-disulfide reductase activity
337	Q6FT75	CAGL0G04807g		VAM3	27.97	3	3	3	3		Syntaxin-like vacuolar t-SNARE that functions with Vam7p in vacuolar protein trafficking; mediates docking/fusion of late transport intermediates with the vacuole; has an acidic di-leucine sorting signal and C-terminal transmembrane region	Ortholog(s) have SNAP receptor activity and role in autophagosome maturation, hyphal growth, piecemeal microautophagy of the nucleus, vacuole fusion, non-autophagic, vacuole inheritance, vesicle docking, vesicle fusion with vacuole
338	Q6FT81	CAGL0G04675g		RSM28	35.69	4	5	4	5		Mitochondrial ribosomal protein of the small subunit; genetic interactions suggest a possible role in promoting translation initiation	Ortholog(s) have structural constituent of ribosome activity, role in mitochondrial translational initiation and mitochondrial small ribosomal subunit localization
339	Q6FT82	CAGL0G04653g		MZM1	13.21	5	5	4	4		Mitochondrial matrix protein with a role in maintaining the labile mitochondrial zinc pool; null mutant has a respiratory growth defect and an elevated frequency of mitochondrial genome loss; overexpression causes cell cycle delay or arrest	Ortholog(s) have protein binding involved in protein folding activity, role in mitochondrial respiratory chain complex III assembly and mitochondrial matrix localization
340	Q6FT94	CAGL0G04389g		GZF3	51.33	2	4	4	6		GATA zinc finger protein and Dal80p homolog that negatively regulates nitrogen catabolic gene expression by competing with Gat1p for GATA site binding; function requires a repressive carbon source; dimerizes with Dal80p and binds to Tor1p	Ortholog(s) have DNA-binding transcription factor activity, RNA polymerase II-specific, sequence-specific DNA binding activity
341	Q6FTB5	CAGL0G03795g	SSA1	SSA2	69.47	7	9	2	4		ATP binding protein involved in protein folding and vacuolar import of proteins; member of heat shock protein 70 (HSP70) family; associated with the chaperonin-containing T-complex; present in the cytoplasm, vacuolar membrane and cell wall; 98% identical with Ssa1p, but subtle differences between the two proteins provide functional specificity with respect to propagation of yeast [URE3] prions an…	Heat shock protein of the HSP70 family
342	Q6FTC1	CAGL0G03663g		SCS2	28.34	7	10	7	8		Integral ER membrane protein that regulates phospholipid metabolism via an interaction with the FFAT motif of Opi1p, also involved in telomeric silencing, disruption causes inositol auxotrophy above 34 degrees C, VAP homolog	Ortholog(s) have FFAT motif binding, phosphatidylinositol binding activity
343	Q6FTC5	CAGL0G03575g		RPL23B	14.47	21	78	20	92		Protein component of the large (60S) ribosomal subunit, identical to Rpl23Ap and has similarity to E. coli L14 and rat L23 ribosomal proteins	Has domain(s) with predicted structural constituent of ribosome activity, role in translation and ribosome localization; evidence for a extended second exon by 2 amino acids
344	Q6FTD8	CAGL0G03289g	SSA3	SSA4	69.81	4	7	6	9		Heat shock protein that is highly induced upon stress; plays a role in SRP-dependent cotranslational protein-membrane targeting and translocation; member of the HSP70 family; cytoplasmic protein that concentrates in nuclei upon starvation	Heat shock protein of the HSP70 family
345	Q6FTH4	CAGL0G02475g		RPL40B	14.56	14	579	15	594		Fusion protein, identical to Rpl40Ap, that is cleaved to yield ubiquitin and a ribosomal protein of the large (60S) ribosomal subunit with similarity to rat L40; ubiquitin may facilitate assembly of the ribosomal protein into ribosomes	Ortholog(s) have role in protein ubiquitination, ribosomal large subunit assembly, ribosomal large subunit export from nucleus and cytosolic large ribosomal subunit localization
346	Q6FTH5	CAGL0G02453g		PTR2	67.8	3	3	2	2		Integral membrane peptide transporter, mediates transport of di- and tri-peptides; conserved protein that contains 12 transmembrane domains; PTR2 expression is regulated by the N-end rule pathway via repression by Cup9p	Ortholog(s) have dipeptide transmembrane transporter activity, tripeptide transmembrane transporter activity, role in dipeptide transmembrane transport, tripeptide transport and cell division site, plasma membrane of cell tip localization
347	Q6FTI3	CAGL0G02277g		MRPL20	24.05	4	4	7	9		mitochondrial ribosomal protein of the large subunit	Ortholog(s) have structural constituent of ribosome activity and mitochondrial large ribosomal subunit localization
348	Q6FTK1	CAGL0G01881g		MRPL51	15.67	3	10	3	23		mitochondrial ribosomal protein of the large subunit	Ortholog(s) have structural constituent of ribosome activity and mitochondrial large ribosomal subunit localization
349	Q6FTN6	CAGL0G01078g		RPL26A	14.21	12	48	11	43		Protein component of the large (60S) ribosomal subunit, nearly identical to Rpl26Bp and has similarity to E. coli L24 and rat L26 ribosomal proteins; binds to 5.8S rRNA	Ortholog(s) have RNA binding, structural constituent of ribosome activity, role in cytoplasmic translation and cytosolic large ribosomal subunit localization
350	Q6FTN8	CAGL0G01034g	FKS1	FKS1	213.78	61	92	58	107		Catalytic subunit of 1,3-beta-D-glucan synthase, functionally redundant with alternate catalytic subunit Gsc2p; binds to regulatory subunit Rho1p; involved in cell wall synthesis and maintenance; localizes to sites of cell wall remodeling	Putative 1,3-beta-glucan synthase component; functionally redundant with Fks2p; "hot spot" mutations in FKS1 confer resistance to echinocandins
351	Q6FTP0	CAGL0G00990g	RPP0	RPP0	33.57	6	6	7	7		Conserved ribosomal protein P0 of the ribosomal stalk, which is involved in interaction between translational elongation factors and the ribosome; similar to rat P0, human P0, and E. coli L10e; phosphorylated on serine 302	Acidic ribosomal protein L10
352	Q6FTP4	CAGL0G00902g		NUP2	78.44	18	29	20	36		Nucleoporin involved in nucleocytoplasmic transport, binds to either the nucleoplasmic or cytoplasmic faces of the nuclear pore complex depending on Ran-GTP levels; also has a role in chromatin organization	Ortholog(s) have Ran GTPase binding, structural constituent of nuclear pore activity
353	Q6FTQ3	CAGL0G00660g		NUP60	56.43	6	6	8	8		Subunit of the nuclear pore complex (NPC), functions to anchor Nup2p to the NPC in a process controlled by the nucleoplasmic concentration of Gsp1p-GTP; involved in nuclear export and cytoplasmic localization of specific mRNAs such as ASH1	Ortholog(s) have phospholipid binding, structural constituent of nuclear pore activity
354	Q6FTR2	CAGL0G00396g		RTT102	29.54	3	3	4	6		Component of both the SWI/SNF and RSC chromatin remodeling complexes, suggested role in chromosome maintenance; possible weak regulator of Ty1 transposition	Ortholog(s) have DNA translocase activity, role in chromosome segregation, nucleosome disassembly, transcription elongation from RNA polymerase II promoter and RSC-type complex, SWI/SNF complex localization
355	Q6FTR6 #$	CAGL0G00308g	SCW4	SCW4	39.42	17	543	17	552		Cell wall protein with similarity to glucanases; scw4 scw10 double mutants exhibit defects in mating	Putative transglycosidase with a predicted role in the modification of 1,3-beta-glucan
356	Q6FTR7 #$	CAGL0G00286g	GAS1	GAS1	59.9	14	140	15	152	Yes		Putative glycoside hydrolase of the Gas/Phr family; predicted GPI-anchor
357	Q6FTR9	CAGL0G00242g	YOR1	YOR1	167.65	28	30	28	29		Plasma membrane ATP-binding cassette (ABC) transporter, multidrug transporter mediates export of many different organic anions including oligomycin; similar to human cystic fibrosis transmembrane receptor (CFTR)	Putative ABC transporter involved in multidrug efflux; gene is upregulated in azole-resistant strain
358	Q6FTS0 #$	CAGL0G00220g		BGL2	33.67	15	357	14	325		Endo-beta-1,3-glucanase, major protein of the cell wall, involved in cell wall maintenance	Ortholog(s) have 1,3-beta-glucanosyltransferase activity, glucan endo-1,3-beta-D-glucosidase activity
359	Q6FTT4	CAGL0F09031g		RPS4B	29.43	3	3	3	3		Protein component of the small (40S) ribosomal subunit; identical to Rps4Ap and has similarity to rat S4 ribosomal protein	Ortholog(s) have structural constituent of ribosome activity and cytosolic small ribosomal subunit, extracellular region localization
360	Q6FTT6	CAGL0F08987g		VMA10	12.9	5	5	7	7		Subunit G of the eight-subunit V1 peripheral membrane domain of the vacuolar H+-ATPase (V-ATPase), an electrogenic proton pump found throughout the endomembrane system; involved in vacuolar acidification	Ortholog(s) have vacuolar proton-transporting V-type ATPase, V1 domain localization
361	Q6FTU1 #$	CAGL0F08833g		MSB2	98.28	9	29	9	29		Mucin family member involved in the Cdc42p- and MAP kinase-dependent filamentous growth signaling pathway; also functions as an osmosensor in parallel to the Sho1p-mediated pathway; potential Cdc28p substrate	Putative adhesin-like protein
362	Q6FTU5	CAGL0F08745g		STF2	9.73	1	7	1	6		Protein involved in regulation of the mitochondrial F1F0-ATP synthase; Stf1p and Stf2p may act as stabilizing factors that enhance inhibitory action of the Inh1p protein	Ortholog(s) have role in cellular response to desiccation and cytoplasm localization
363	Q6FTV4	CAGL0F08547g	EFB1	EFB1	22.9	7	8	6	6		Translation elongation factor 1 beta; stimulates nucleotide exchange to regenerate EF-1 alpha-GTP for the next elongation cycle; part of the EF-1 complex, which facilitates binding of aminoacyl-tRNA to the ribosomal A site	Translation elongation factor eEF1beta; protein abundance decreased in ace2 mutant cells
364	Q6FTW2	CAGL0F08371g	TNA1	TNA1	59.42	7	7	11	14		High affinity nicotinic acid plasma membrane permease, responsible for uptake of low levels of nicotinic acid; expression of the gene increases in the absence of extracellular nicotinic acid or para-aminobenzoate (PABA)	High-affinity nicotinic acid transporter; strongly induced under niacin-limiting conditions
365	Q6FTW6	CAGL0F08261g		ENO1	47.25	3	9	2	8		Enolase I, a phosphopyruvate hydratase that catalyzes the conversion of 2-phosphoglycerate to phosphoenolpyruvate during glycolysis and the reverse reaction during gluconeogenesis; expression is repressed in response to glucose	Ortholog(s) have high molecular weight kininogen binding, phosphopyruvate hydratase activity, protein-glutamine gamma-glutamyltransferase activity
366	Q6FTX5	CAGL0F08063g		YAP1802	60.59	4	4	6	7		Protein involved in clathrin cage assembly; binds Pan1p and clathrin; homologous to Yap1801p, member of the AP180 protein family	Ortholog(s) have role in endocytosis
367	Q6FTZ6 #$	CAGL0F07601g	CWP1.1	CWP2	21.33	9	727	11	873	Yes	Covalently linked cell wall mannoprotein, major constituent of the cell wall; plays a role in stabilizing the cell wall; involved in low pH resistance; precursor is GPI-anchored	GPI-linked cell wall protein
368	Q6FTZ7 #$	CAGL0F07579g	CWP1.2	CWP1	20.71	2	85	1	62	Yes	Cell wall mannoprotein that localizes specifically to birth scars of daughter cells, linked to a beta-1,3- and beta-1,6-glucan heteropolymer through a phosphodiester bond; required for propionic acid resistance	Putative GPI-linked cell wall protein
369	Q6FU01	CAGL0F07491g		MLC1	15.72	3	3	3	3		Essential light chain for Myo1p, light chain for Myo2p; stabilizes Myo2p by binding to the neck region; interacts with Myo1p, Iqg1p, and Myo2p to coordinate formation and contraction of the actomyosin ring with targeted membrane deposition	Ortholog(s) have myosin II heavy chain binding, myosin V binding activity and role in mitotic actomyosin contractile ring assembly actin filament organization, protein localization to medial cortex, vesicle targeting
370	Q6FU25	CAGL0F06919g		IRC24	26.95	3	3	3	3		Putative benzil reductase;(GFP)-fusion protein localizes to the cytoplasm and is induced by the DNA-damaging agent MMS; sequence similarity with short-chain dehydrogenase/reductases; null mutant has increased spontaneous Rad52p foci	Ortholog(s) have oxidoreductase activity, acting on NAD(P)H, oxygen as acceptor activity
371	Q6FU26	CAGL0F06897g		YIR035C	28.35	3	4	3	3		Putative cytoplasmic protein of unknown function	Putative protein with alcohol dehydrogenase domain; gene is downregulated in azole-resistant strain
372	Q6FU44	CAGL0F06501g		ARG7	47.77	3	3	4	4		Mitochondrial ornithine acetyltransferase, catalyzes the fifth step in arginine biosynthesis; also possesses acetylglutamate synthase activity, regenerates acetylglutamate while forming ornithine	Ortholog(s) have acetyl-CoA:L-glutamate N-acetyltransferase activity, glutamate N-acetyltransferase activity, role in ornithine biosynthetic process and mitochondrial matrix localization
373	Q6FU58	CAGL0F06127g		YKL069W	19.23	3	3	3	3		Methionine-R-sulfoxide reductase, reduces the R enantiomer of free Met-SO, in contrast to Ycl033Cp which reduces Met-R-SO in a peptide linkage; has a role in protection against oxidative stress	Protein of unknown function
374	Q6FU99 #$	CAGL0F05137g		PRY2	25.31	2	2	2	2		Protein of unknown function	Ortholog(s) have sterol binding activity, role in pathogenesis, sterol transport and cell surface, extracellular region localization
375	Q6FUA0 #	CAGL0F05115g		INA1	75.13	7	8	6	6		Putative protein of unknown function; YLR413W is not an essential gene	Ortholog(s) have plasma membrane localization
376	Q6FUB1	CAGL0F04873g		KRE6	77.54	9	11	10	15		Type II integral membrane protein required for beta-1,6 glucan biosynthesis; putative beta-glucan synthase; localizes to the ER, plasma membrane, sites of polarized growth and secretory vesicles; functionally redundant with Skn1p	Ortholog(s) have glucosidase activity and role in (1->6)-beta-D-glucan biosynthetic process, cell separation after cytokinesis, fungal-type cell wall organization
377	Q6FUB4 #	CAGL0F04807g		OM45	52.52	2	2	3	3		Protein of unknown function, major constituent of the mitochondrial outer membrane; located on the outer (cytosolic) face of the outer membrane	Ortholog(s) have role in pathogenesis and cell surface, hyphal cell wall, integral component of mitochondrial outer membrane, plasma membrane localization
378	Q6FUB9	CAGL0F04697g		YLR257W	41.47	4	4	6	9		Putative protein of unknown function	Ortholog of S. cerevisiae : YLR257W and Saccharomyces cerevisiae S288C : YLR257W
379	Q6FUD4	CAGL0F04345g		IST2	104.71	4	12	5	13		Plasma membrane protein that may be involved in osmotolerance, localizes to the mother cell in small-budded cells and to the bud in medium- and large-budded cells; mRNA is transported to the bud tip by an actomyosin-driven process	Protein of unknown function
380	Q6FUD5	CAGL0F04323g		POL12	74.27	4	4	3	3		B subunit of DNA polymerase alpha-primase complex, required for initiation of DNA replication during mitotic and premeiotic DNA synthesis; also functions in telomere capping and length regulation	Ortholog(s) have DNA-directed DNA polymerase activity, role in DNA replication initiation, telomere capping and alpha DNA polymerase:primase complex, nuclear envelope localization
381	Q6FUD8	CAGL0F04257g		HEK2	38.89	2	3	3	3		RNA binding protein involved in the asymmetric localization of ASH1 mRNA; represses translation of ASH1 mRNA, an effect reversed by Yck1p-dependent phosphoryation; regulates telomere position effect and length; similarity to hnRNP-K	Ortholog(s) have mRNA binding activity, role in intracellular mRNA localization, mRNA stabilization, telomere maintenance via telomerase and P-body, nuclear chromosome, telomeric region localization
382	Q6FUE0	CAGL0F04213g		PET9	33.28	5	7	6	7		Major ADP/ATP carrier of the mitochondrial inner membrane, exchanges cytosolic ADP for mitochondrially synthesized ATP; also imports heme and ATP; phosphorylated; required for viability in many lab strains that carry a sal1 mutation	Ortholog(s) have ATP:ADP antiporter activity
383	Q6FUF5 #$	CAGL0F03883g	GAS4	GAS3	57.01	13	58	12	64	Yes	Low abundance, possibly inactive member of the GAS family of GPI-containing proteins; putative 1,3-beta-glucanosyltransferase with similarity to other GAS family members; localizes to the cell wall; mRNA induced during sporulation	Putative glycoside hydrolase of the Gas/Phr family; predicted GPI-anchor
384	Q6FUH0	CAGL0F03553g	DAP1	DAP1	16.69	2	3	3	4		Heme-binding protein involved in regulation of cytochrome P450 protein Erg11p; damage response protein, related to mammalian membrane progesterone receptors; mutations lead to defects in telomeres, mitochondria, and sterol synthesis	Putative heme-binding protein involved in regulation of cytochrome P450, Erg11p; required for growth under iron starvation
385	Q6FUH1	CAGL0F03531g		MEX67	66.36	2	2	2	2		Poly(A)RNA binding protein involved in nuclear mRNA export, component of the nuclear pore; ortholog of human TAP	Ortholog(s) have RNA binding activity and role in poly(A)+ mRNA export from nucleus, ribosomal large subunit export from nucleus, ribosomal small subunit export from nucleus
386	Q6FUI2	CAGL0F03267g		LAM4	146.81	1	2	3	4		Protein of unknown function that may interact with ribosomes, based on co-purification experiments; the authentic, non-tagged protein is detected in highly purified mitochondria in high-throughput studies	Ortholog(s) have intermembrane sterol transfer activity, sterol binding activity and cortical endoplasmic reticulum localization
387	Q6FUJ0	CAGL0F03091g		DYN2	9.99	6	8	3	5		Cytoplasmic light chain dynein, microtubule motor protein; proposed to be involved in the assembly of the nuclear pore complex	Ortholog(s) have ATP-dependent microtubule motor activity, plus-end-directed activity
388	Q6FUJ6	CAGL0F02937g		RPL12B	17.74	8	12	7	12		Protein component of the large (60S) ribosomal subunit, nearly identical to Rpl12Ap; rpl12a rpl12b double mutant exhibits slow growth and slow translation; has similarity to E. coli L11 and rat L12 ribosomal proteins	Ortholog(s) have role in ribosomal large subunit assembly and cytosolic large ribosomal subunit localization
389	Q6FUL3	CAGL0F02563g	HPT1	HPT1	24.56	3	4	2	2		Dimeric hypoxanthine-guanine phosphoribosyltransferase, catalyzes the formation of both inosine monophosphate and guanosine monophosphate; mutations in the human homolog HPRT1 can cause Lesch-Nyhan syndrome and Kelley-Seegmiller syndrome	Putative hypoxanthine guanine phosphoribosyl transferase
390	Q6FUM3	CAGL0F02299g		LOC1	23.65	5	5	5	7		Nuclear protein involved in asymmetric localization of ASH1 mRNA; binds double-stranded RNA in vitro; constituent of 66S pre-ribosomal particles	Ortholog(s) have mRNA binding activity
391	Q6FUP6	CAGL0F01749g		SHM2	52.27	7	8	8	9		Cytosolic serine hydroxymethyltransferase, converts serine to glycine plus 5,10 methylenetetrahydrofolate; major isoform involved in generating precursors for purine, pyrimidine, amino acid, and lipid biosynthesis	Putative serine hydroxymethyltransferase; protein differentially expressed in azole resistant strain
392	Q6FUP9	CAGL0F01683g		RPL22A	13.67	3	34	3	45	Yes	Protein component of the large (60S) ribosomal subunit, has similarity to Rpl22Bp and to rat L22 ribosomal protein	Predicted GPI-linked protein
393	Q6FUQ9 #$	CAGL0F01463g	TIR1	TIR2	21.45	1	8	1	8	Yes	Putative cell wall mannoprotein of the Srp1p/Tip1p family of serine-alanine-rich proteins; transcription is induced by cold shock and anaerobiosis	Putative GPI-linked cell wall mannoprotein of the Srp1p/Tip1p family
394	Q6FUR4 #$	CAGL0F01287g	GAS5	GAS5	51.83	11	50	10	55		1,3-beta-glucanosyltransferase, has similarity to Gas1p; localizes to the cell wall	Putative transglycosidase with a predicted role in the elongation of 1,3-beta-glucan
395	Q6FUR5	CAGL0F01265g	YAP7	YAP7	68.43	2	2	3	3		Putative basic leucine zipper (bZIP) transcription factor	bZIP domain-containing protein involved in regulation of nitric oxide detoxification
396	Q6FUR8	CAGL0F01199g		PRE6	28.48	4	5	4	4		Alpha 4 subunit of the 20S proteasome; may replace alpha 3 subunit (Pre9p) under stress conditions to create a more active proteasomal isoform; GFP-fusion protein relocates from cytosol to the mitochondrial surface upon oxidative stress	Ortholog(s) have role in establishment of cell polarity, proteasomal ubiquitin-independent protein catabolic process, proteasome-mediated ubiquitin-dependent protein catabolic process
397	Q6FUS5	CAGL0F01045g		RPS15	16.08	2	2	4	4		Protein component of the small (40S) ribosomal subunit; has similarity to E. coli S19 and rat S15 ribosomal proteins	Ortholog(s) have role in rRNA export from nucleus
398	Q6FUV3	CAGL0F00407g		LIA1	35.95	2	2	5	6		Deoxyhypusine hydroxylase, a HEAT-repeat containing metalloenzyme that catalyzes hypusine formation; binds to and is required for the modification of Hyp2p (eIF5A); complements S. pombe mmd1 mutants defective in mitochondrial positioning	Ortholog(s) have deoxyhypusine monooxygenase activity
399	Q6FUW5 #$	CAGL0E06644g	EPA1	EPA1	111.52	9	17	8	18	Yes	Essential, conserved, cytoplasmic ATPase; phosphorylated by the Pcl1p-Pho85p kinase complex	Sub-telomerically encoded adhesin with a role in cell adhesion; GPI-anchored cell wall protein; N-terminal ligand binding domain binds to ligands containing a terminal galactose residue; belongs to adhesin cluster I
400	Q6FUX8	CAGL0E06358g	GPM1	GPM1	27.57	13	30	12	24		Tetrameric phosphoglycerate mutase, mediates the conversion of 3-phosphoglycerate to 2-phosphoglycerate during glycolysis and the reverse reaction during gluconeogenesis	Putative tetrameric phosphoglycerate mutase; expression downregulated in biofilm vs planktonic cell culture
401	Q6FUY4	CAGL0E06226g		APE2	104.41	7	7	3	4		Aminopeptidase yscII; may have a role in obtaining leucine from dipeptide substrates; sequence coordinates have changed since RT-PCR analysis showed that the adjacent ORF YKL158W comprises the 5' exon of APE2/YKL157W	Ortholog(s) have metalloaminopeptidase activity, serine-type peptidase activity and role in peptide catabolic process, protein localization by the NVT pathway
402	Q6FUY7	CAGL0E06160g		SSO2	32.56	9	13	6	15		Plasma membrane t-SNARE involved in fusion of secretory vesicles at the plasma membrane; syntaxin homolog that is functionally redundant with Sso1p	Ortholog(s) have SNAP receptor activity, phosphatidic acid binding activity
403	Q6FUY8 #	CAGL0E06138g		FAS2	207.52	4	4	6	6		Alpha subunit of fatty acid synthetase, which catalyzes the synthesis of long-chain saturated fatty acids; contains the acyl-carrier protein domain and beta-ketoacyl reductase, beta-ketoacyl synthase and self-pantetheinylation activities	Ortholog(s) have fatty acid synthase activity, role in palmitic acid biosynthetic process, response to pH and fatty acid synthase complex, glyoxysome localization
404	Q6FUZ7 #$	CAGL0E05940g		FLC1	95.58	8	9	6	6		Putative FAD transporter; required for uptake of FAD into endoplasmic reticulum; involved in cell wall maintenance	Ortholog(s) have FAD transmembrane transporter activity, calcium channel activity
405	Q6FUZ9	CAGL0E05896g		SAR1	21.39	2	2	2	2		GTPase, GTP-binding protein of the ARF family, component of COPII coat of vesicles; required for transport vesicle formation during ER to Golgi protein transport	Ortholog(s) have GTP binding, GTPase activity
406	Q6FV12	CAGL0E05610g		PYK2	55.56	6	6	4	4		Pyruvate kinase that appears to be modulated by phosphorylation; PYK2 transcription is repressed by glucose, and Pyk2p may be active under low glycolytic flux	Ortholog(s) have pyruvate kinase activity, role in canonical glycolysis and mitochondrion localization
407	Q6FV23	CAGL0E05346g		VMA4	26.4	2	2	3	3		Subunit E of the eight-subunit V1 peripheral membrane domain of the vacuolar H+-ATPase (V-ATPase), an electrogenic proton pump found throughout the endomembrane system; required for the V1 domain to assemble onto the vacuolar membrane	Ortholog(s) have fungal-type vacuole membrane, vacuolar proton-transporting V-type ATPase, V1 domain localization
408	Q6FV31	CAGL0E05170g	GRE2(A)	ARI1	39.1	2	2	9	13		NADPH-dependent aldehyde reductase, utilizes aromatic and alophatic aldehyde substrates; member of the short-chain dehydrogenase/reductase superfamily	Putative methylglyoxal reductase (NADPH-dependent)
409	Q6FV43	CAGL0E04906g		AHA1	40.04	3	4	3	3		Co-chaperone that binds to Hsp82p and activates its ATPase activity; similar to Hch1p; expression is regulated by stresses such as heat shock	Ortholog(s) have ATPase activator activity, chaperone binding activity, role in cellular response to heat, protein folding and cytoplasm localization
410	Q6FV55 #$	CAGL0E04620g	PST1	PST1	44.02	9	26	7	29	Yes	Cell wall protein that contains a putative GPI-attachment site; secreted by regenerating protoplasts; up-regulated by activation of the cell integrity pathway, as mediated by Rlm1p; upregulated by cell wall damage via disruption of FKS1	Ecm33-family protein with a predicted role in cell wall biogenesis and organization; predicted GPI-anchor
411	Q6FV79	CAGL0E04092g	SIT1	ARN1	72.9	6	9	10	16		Transporter, member of the ARN family of transporters that specifically recognize siderophore-iron chelates; responsible for uptake of iron bound to ferrirubin, ferrirhodin, and related siderophores	Putative siderophore-iron transporter with 14 transmembrane domains; required for iron-dependent survival in macrophages; mRNA levels elevated under iron deficiency conditions; plasma membrane localized
412	Q6FV81	CAGL0E04048g	COF1	COF1	15.89	2	2	4	5		Cofilin, promotes actin filament depolarization in a pH-dependent manner; binds both actin monomers and filaments and severs filaments; thought to be regulated by phosphorylation at SER4; ubiquitous and essential in eukaryotes	Cofilin, actin binding and severing protein; protein abundance decreased in ace2 mutant cells
413	Q6FV86	CAGL0E03938g		RPL8A	28.19	13	36	11	26		Ribosomal protein L4 of the large (60S) ribosomal subunit, nearly identical to Rpl8Bp and has similarity to rat L7a ribosomal protein; mutation results in decreased amounts of free 60S subunits	Ortholog(s) have role in maturation of LSU-rRNA and cytosolic large ribosomal subunit localization
414	Q6FVB8	CAGL0E03157g	CYS4	CYS4	55.39	3	4	3	3		Cystathionine beta-synthase, catalyzes synthesis of cystathionine from serine and homocysteine, the first committed step in cysteine biosynthesis; responsible for hydrogen sulfide generation; mutations in human ortholog cause homocystinuria	Ortholog(s) have cystathionine beta-synthase activity
415	Q6FVC8 #$	CAGL0E02915g		SCW11	52.89	3	10	5	16			Putative adhesin-like protein
416	Q6FVD4	CAGL0E02783g		SLA1	131.45	3	5	3	6		Cytoskeletal protein binding protein required for assembly of the cortical actin cytoskeleton; interacts with proteins regulating actin dynamics and proteins required for endocytosis; found in the nucleus and cell cortex; has 3 SH3 domains	Ortholog(s) have endocytic adaptor activity, ubiquitin binding activity and role in actin cortical patch assembly, endocytosis, hyphal growth, negative regulation of Arp2/3 complex-mediated actin nucleation
417	Q6FVF6	CAGL0E02255g		ZEO1	13.76	15	191	13	113		Peripheral membrane protein of the plasma membrane that interacts with Mid2p; regulates the cell integrity pathway mediated by Pkc1p and Slt2p; the authentic protein is detected in a phosphorylated state in highly purified mitochondria	Ortholog(s) have role in fungal-type cell wall organization and extrinsic component of plasma membrane localization
418	Q6FVG0	CAGL0E02167g		MDY2	22.28	4	4	2	2		Protein with a role in insertion of tail-anchored proteins into the ER membrane; forms a complex with Get4p; required for efficient mating; involved in shmoo formation and nuclear migration in the pre-zygote; associates with ribosomes	Ortholog(s) have role in cell morphogenesis involved in conjugation with cellular fusion, posttranslational protein targeting to endoplasmic reticulum membrane, protein insertion into ER membrane
419	Q6FVG7	CAGL0E02013g		RPL18A	17.52	3	4	5	5		Protein component of the large (60S) ribosomal subunit, identical to Rpl18Bp and has similarity to rat L18 ribosomal protein; intron of RPL18A pre-mRNA forms stem-loop structures that are a target for Rnt1p cleavage leading to degradation	Ortholog(s) have cytosolic large ribosomal subunit localization
420	Q6FVG8	CAGL0E01991g		RPS19A	15.84	10	30	9	29		Protein component of the small (40S) ribosomal subunit, required for assembly and maturation of pre-40 S particles; mutations in human RPS19 are associated with Diamond Blackfan anemia; nearly identical to Rps19Bp	Ortholog(s) have structural constituent of ribosome activity, role in rRNA export from nucleus, ribosomal small subunit biogenesis and cytosolic small ribosomal subunit localization
421	Q6FVK5	CAGL0E01177g	CPR1	CPR1	17.38	10	21	9	21		Cytoplasmic peptidyl-prolyl cis-trans isomerase (cyclophilin), catalyzes the cis-trans isomerization of peptide bonds N-terminal to proline residues; binds the drug cyclosporin A	Cyclophilin; peptidyl-prolyl cis-trans isomerase
422	Q6FVK7	CAGL0E01133g	HOM2	HOM2	38.7	5	7	5	8		Aspartic beta semi-aldehyde dehydrogenase, catalyzes the second step in the common pathway for methionine and threonine biosynthesis; expression regulated by Gcn4p and the general control of amino acid synthesis	Ortholog(s) have aspartate-semialdehyde dehydrogenase activity and role in homoserine biosynthetic process, methionine biosynthetic process, threonine biosynthetic process
423	Q6FVL9	CAGL0E00869g		STM1	29.79	24	237	26	188		Protein required for optimal translation under nutrient stress; perturbs association of Yef3p with ribosomes; involved in TOR signaling; binds G4 quadruplex and purine motif triplex nucleic acid; helps maintain telomere structure	Protein of unknown function
424	Q6FVM4	CAGL0E00737g		HMO1	30.25	3	3	5	5		Chromatin associated high mobility group (HMG) family member involved in genome maintenance; rDNA-binding component of the Pol I transcription system; associates with a 5'-3' DNA helicase and Fpr1p, a prolyl isomerase	Ortholog(s) have DNA binding, bending, double-stranded DNA binding, four-way junction DNA binding, sequence-specific DNA binding activity
425	Q6FVN1	CAGL0E00583g		TRX3	15.93	14	59	13	55		Mitochondrial thioredoxin, highly conserved oxidoreductase required to maintain the redox homeostasis of the cell, forms the mitochondrial thioredoxin system with Trr2p, redox state is maintained by both Trr2p and Glr1p	Ortholog(s) have disulfide oxidoreductase activity, role in cellular response to oxidative stress and mitochondrion localization
426	Q6FVQ1	CAGL0D06622g		SPA2	132.18	6	7	9	12		Component of the polarisome, which functions in actin cytoskeletal organization during polarized growth; acts as a scaffold for Mkk1p and Mpk1p cell wall integrity signaling components; potential Cdc28p substrate	Ortholog(s) have MAP-kinase scaffold activity
427	Q6FVQ9	CAGL0D06446g	STT4	STT4	217.08	3	3	2	2		Phosphatidylinositol-4-kinase that functions in the Pkc1p protein kinase pathway; required for normal vacuole morphology, cell wall integrity, and actin cytoskeleton organization	Ortholog(s) have 1-phosphatidylinositol 4-kinase activity
428	Q6FVR0	CAGL0D06424g	ACO1	ACO1	85.43	5	7	4	4		Aconitase, required for the tricarboxylic acid (TCA) cycle and also independently required for mitochondrial genome maintenance; phosphorylated; component of the mitochondrial nucleoid; mutation leads to glutamate auxotrophy	Putative aconitate hydratase
429	Q6FVR1	CAGL0D06402g	MET15	MET17	48.14	4	4	6	7		Methionine and cysteine synthase (O-acetyl homoserine-O-acetyl serine sulfhydrylase), required for sulfur amino acid synthesis	O-acetyl homoserine sulfhydrylase (OAHSH), ortholog of S. cerevisiae MET17; required for utilization of inorganic sulfate as sulfur source; able to utilize cystine as a sulfur source while S. cerevisiae met15 mutants are unable to do so
430	Q6FVV5	CAGL0D05280g		MET10	113.94	2	2	2	2		Subunit alpha of assimilatory sulfite reductase, which converts sulfite into sulfide	Ortholog(s) have sulfite reductase (NADPH) activity, role in sulfate assimilation and sulfite reductase complex (NADPH) localization
431	Q6FVV8	CAGL0D05214g		RPL29	6.74	2	62	3	24		Protein component of the large (60S) ribosomal subunit, has similarity to rat L29 ribosomal protein; not essential for translation, but required for proper joining of the large and small ribosomal subunits and for normal translation rate	Ortholog(s) have structural constituent of ribosome activity, role in cytoplasmic translation and cytosolic large ribosomal subunit localization
432	Q6FVX8	CAGL0D04708g		CTR1	42.58	5	9	5	11			Ortholog(s) have copper ion transmembrane transporter activity, role in copper ion import, iron ion transmembrane transport and plasma membrane localization
433	Q6FW27	CAGL0D03498g		YKT6	23.16	3	3	2	2		Vesicle membrane protein (v-SNARE) with acyltransferase activity; involved in trafficking to and within the Golgi, endocytic trafficking to the vacuole, and vacuolar fusion; membrane localization due to prenylation at the carboxy-terminus	Ortholog(s) have SNAP receptor activity, palmitoyltransferase activity
434	Q6FW38	CAGL0D03212g		POM34	41.57	3	3	2	2		Integral membrane protein of the nuclear pore; has an important role in maintaining the architecture of the pore complex	Ortholog(s) have role in nuclear pore organization, protein import into nucleus, spindle pole body duplication and integral component of nuclear outer membrane, nuclear pore transmembrane ring localization
435	Q6FW45	CAGL0D03058g		PRE3	23.61	2	2	2	2		Beta 1 subunit of the 20S proteasome, responsible for cleavage after acidic residues in peptides	Ortholog(s) have proteasome core complex, beta-subunit complex localization
436	Q6FW50 #$	CAGL0D02948g	KAR2	KAR2	73.28	4	6	5	7		ATPase involved in protein import into the ER, also acts as a chaperone to mediate protein folding in the ER and may play a role in ER export of soluble proteins; regulates the unfolded protein response via interaction with Ire1p	Protein with a predicted role in nuclear fusion
437	Q6FW69 #$	CAGL0D02530g	EGT2	EGT2	72.8	12	128	12	127	Yes	Glycosylphosphatidylinositol (GPI)-anchored cell wall endoglucanase required for proper cell separation after cytokinesis, expression is activated by Swi5p and tightly regulated in a cell cycle-dependent manner	Putative endoglucanase; glycoside hydrolase; predicted GPI-anchor
438	Q6FW73	CAGL0D02442g	LEM3	LEM3	48.03	4	5	3	6		Membrane protein of the plasma membrane and ER, interacts specifically in vivo with the phospholipid translocase (flippase) Dnf1p; involved in translocation of phospholipids and alkylphosphocholine drugs across the plasma membrane	Glycoprotein involved in the membrane translocation of phospholipids and alkylphosphocholine drugs
439	Q6FW89	CAGL0D02090g	ASC1	ASC1	30.07	2	3	4	5		G-protein beta subunit and guanine nucleotide dissociation inhibitor for Gpa2p; ortholog of RACK1 that inhibits translation; core component of the small (40S) ribosomal subunit; represses Gcn4p in the absence of amino acid starvation	40S small subunit ribosomal protein
440	Q6FW91	CAGL0D02046g		CMC1	12.18	2	2	2	2		Evolutionarily conserved copper-binding protein of the mitochondrial intermembrane space, may be involved in delivering copper from the matrix to the cytochrome c oxidase complex; contains a twin CX9C motif	Ortholog(s) have copper ion binding activity, role in mitochondrial respiratory chain complex IV assembly and extrinsic component of mitochondrial inner membrane, mitochondrial intermembrane space localization
441	Q6FW98	CAGL0D01892g		AAT2	45.61	3	4	3	4		Cytosolic aspartate aminotransferase, involved in nitrogen metabolism; localizes to peroxisomes in oleate-grown cells	Ortholog(s) have L-aspartate:2-oxoglutarate aminotransferase activity, role in aspartate biosynthetic process and cytosol, extracellular region, peroxisome localization
442	Q6FWB5	CAGL0D01474g		AIM3	72.39	4	4	2	2		Protein interacting with Rvs167p; null mutant is viable and displays elevated frequency of mitochondrial genome loss	Protein of unknown function
443	Q6FWB6	CAGL0D01452g		CMD1	16.13	3	3	2	2		Calmodulin; Ca++ binding protein that regulates Ca++ independent processes (mitosis, bud growth, actin organization, endocytosis, etc.) and Ca++ dependent processes (stress-activated pathways), targets include Nuf1p, Myo2p and calcineurin	Ortholog(s) have calcium ion binding activity, role in regulation of cell cycle, spore germination and hyphal tip, spitzenkorper localization
444	Q6FWC3	CAGL0D01298g	TKL1	TKL1	73.7	23	32	18	34		Transketolase, similar to Tkl2p; catalyzes conversion of xylulose-5-phosphate and ribose-5-phosphate to sedoheptulose-7-phosphate and glyceraldehyde-3-phosphate in the pentose phosphate pathway; needed for synthesis of aromatic amino acids	Putative transketolase
445	Q6FWE3	CAGL0D00858g		RPS29B	6.72	2	26	1	25		Protein component of the small (40S) ribosomal subunit; nearly identical to Rps29Ap and has similarity to rat S29 and E. coli S14 ribosomal proteins	Ortholog(s) have structural constituent of ribosome activity and cytosolic small ribosomal subunit localization
446	Q6FWE7	CAGL0D00770g	IDP1	IDP1	47.35	2	3	2	2		Mitochondrial NADP-specific isocitrate dehydrogenase, catalyzes the oxidation of isocitrate to alpha-ketoglutarate; not required for mitochondrial respiration and may function to divert alpha-ketoglutarate to biosynthetic processes	Ortholog(s) have isocitrate dehydrogenase (NADP+) activity, role in glutamate biosynthetic process and extracellular region, mitochondrial nucleoid, peroxisome localization
447	Q6FWF4	CAGL0D00616g		RPL31A	12.97	5	6	5	11		Protein component of the large (60S) ribosomal subunit, nearly identical to Rpl31Bp and has similarity to rat L31 ribosomal protein; associates with the karyopherin Sxm1p; loss of both Rpl31p and Rpl39p confers lethality	Ortholog(s) have structural constituent of ribosome activity, role in cytoplasmic translation, regulation of translational fidelity and cytosolic large ribosomal subunit localization
448	Q6FWH3	CAGL0D00176g		GDH3	49.71	16	18	13	14		NADP(+)-dependent glutamate dehydrogenase, synthesizes glutamate from ammonia and alpha-ketoglutarate; rate of alpha-ketoglutarate utilization differs from Gdh1p; expression regulated by nitrogen and carbon sources	Ortholog(s) have glutamate dehydrogenase (NADP+) activity, role in ammonia assimilation cycle, glutamate biosynthetic process, invasive filamentous growth and cytosol, extracellular region, nucleus localization
449	Q6FWI0	CAGL0C05511g		PHO13	34.22	3	3	4	4		Alkaline phosphatase specific for p-nitrophenyl phosphate; also has protein phosphatase activity	Ortholog(s) have alkaline phosphatase activity, phosphoglycolate phosphatase activity, phosphoprotein phosphatase activity and role in phenotypic switching, phosphorylated carbohydrate dephosphorylation, protein dephosphorylation
450	Q6FWJ7	CAGL0C05137g	GPD2	GPD2	46.98	9	16	6	11		NAD-dependent glycerol 3-phosphate dehydrogenase, homolog of Gpd1p, expression is controlled by an oxygen-independent signaling pathway required to regulate metabolism under anoxic conditions; located in cytosol and mitochondria	Putative glycerol 3-phosphate dehydrogenase; protein differentially expressed in azole resistant strain
451	Q6FWJ8 #	CAGL0C05115g	ARG1	ARG1	46.56	4	4	4	4		Arginosuccinate synthetase, catalyzes the formation of L-argininosuccinate from citrulline and L-aspartate in the arginine biosynthesis pathway; potential Cdc28p substrate	Argininosuccinate synthetase
452	Q6FWK4 #	CAGL0C04983g	ADO1	ADO1	36.25	2	2	6	6		Adenosine kinase, required for the utilization of S-adenosylmethionine (AdoMet); may be involved in recycling adenosine produced through the methyl cycle	Putative adenosine kinase; expression upregulated in biofilm vs planktonic cell culture
453	Q6FWK6 #$	CAGL0C04939g		LIH1	42.31	6	6	6	6		Putative protein of unknown function; has sequence or structural similarity to lipases	Has domain(s) with predicted triglyceride lipase activity and role in lipid metabolic process
454	Q6FWL5	CAGL0C04741g	SOD1	SOD1	15.74	12	256	12	201		Cytosolic copper-zinc superoxide dismutase; some mutations are analogous to those that cause ALS (amyotrophic lateral sclerosis) in humans	Cytosolic copper-zinc superoxide dismutase
455	Q6FWM5	CAGL0C04455g	ATP16	ATP16	16.45	2	2	2	2		Delta subunit of the central stalk of mitochondrial F1F0 ATP synthase, which is a large, evolutionarily conserved enzyme complex required for ATP synthesis; phosphorylated	F1F0-ATPase complex, F1 delta subunit; protein abundance decreased in ace2 mutant cells
456	Q6FWM7	CAGL0C04411g		HTA2	13.86	4	4	4	4		Histone H2A, core histone protein required for chromatin assembly and chromosome function; one of two nearly identical (see also HTA1) subtypes; DNA damage-dependent phosphorylation by Mec1p facilitates DNA repair; acetylated by Nat4p	Ortholog(s) have role in DNA repair and replication fork protection complex localization
457	Q6FWM8	CAGL0C04389g		HTB2	13.99	8	72	7	50		Histone H2B, core histone protein required for chromatin assembly and chromosome function; nearly identical to HTB1; Rad6p-Bre1p-Lge1p mediated ubiquitination regulates transcriptional activation, meiotic DSB formation and H3 methylation	Ortholog(s) have replication fork protection complex, site of double-strand break localization
458	Q6FWN1	CAGL0C04301g		YRB1	22.55	3	3	3	3		Ran GTPase binding protein; involved in nuclear protein import and RNA export, ubiquitin-mediated protein degradation during the cell cycle; shuttles between the nucleus and cytoplasm; is essential; homolog of human RanBP1	Ortholog(s) have GTPase activator activity and cytosol localization
459	Q6FWR7	CAGL0C03465g		MSO1	22.8	6	7	7	11		Probable component of the secretory vesicle docking complex, acts at a late step in secretion; shows genetic and physical interactions with Sec1p; required for prospore membrane formation during sporulation	Ortholog(s) have role in ascospore-type prospore membrane assembly, membrane fusion, vesicle docking involved in exocytosis and SNARE complex, cellular bud membrane, cellular bud neck, cellular bud tip, prospore membrane localization
460	Q6FWR8 #	CAGL0C03443g	LYS9	LYS9	48.9	8	9	6	7		Saccharopine dehydrogenase (NADP+, L-glutamate-forming); catalyzes the formation of saccharopine from alpha-aminoadipate 6-semialdehyde, the seventh step in lysine biosynthesis pathway; exhibits genetic and physical interactions with TRM112	Putative saccharopine dehydrogenase
461	Q6FWS6	CAGL0C03267g	FPS1	FPS1	72.3	4	5	3	4		Plasma membrane channel, member of major intrinsic protein (MIP) family; involved in efflux of glycerol and in uptake of acetic acid and the trivalent metalloids arsenite and antimonite; phosphorylated by Hog1p MAPK under acetate stress	Glycerol transporter; involved in flucytosine resistance; double fps1/fps2 mutant accumulates glycerol, has constitutive cell wall stress, is hypersensitive to caspofungin in vitro and in vivo
462	Q6FWU3	CAGL0C02849g		RBL2	12.52	6	10	7	13		Protein involved in microtubule morphogenesis, required for protection from excess free beta-tubulin; proposed to be involved the folding of beta-tubulin; similar to mouse beta-tubulin cofactor A	Ortholog(s) have beta-tubulin binding activity and role in tubulin complex assembly
463	Q6FWW0	CAGL0C02475g		CHZ1	16.22	10	20	10	22		Histone chaperone for Htz1p/H2A-H2B dimer; required for the stabilization of the Chz1p-Htz1-H2B complex; has overlapping function with Nap1p; null mutant displays weak sensitivity to MMS and benomyl; contains a highly conserved CHZ motif	Ortholog(s) have histone binding activity, role in chromatin remodeling and nucleus localization
464	Q6FWW1	CAGL0C02453g		YPT31	23.93	2	2	2	2		Rab family GTPase, very similar to Ypt32p; involved in the exocytic pathway; mediates intra-Golgi traffic or the budding of post-Golgi vesicles from the trans-Golgi	Ortholog(s) have GTPase activity
465	Q6FWW9	CAGL0C02277g	GLN3	GLN3	90.16	2	2	2	2		Transcriptional activator of genes regulated by nitrogen catabolite repression (NCR), localization and activity regulated by quality of nitrogen source	Putative zinc finger transcription factor with a predicted role in nitrogen catabolite repression
466	Q6FWX2 #$	CAGL0C02211g	UTR2	UTR2	52.41	7	49	6	39	Yes	Chitin transglycosylase that functions in the transfer of chitin to beta(1-6) and beta(1-3) glucans in the cell wall; similar to and functionally redundant with Crh1; glycosylphosphatidylinositol (GPI)-anchored protein localized to bud neck	Putative glycoside hydrolase of the Crh family; predicted GPI-anchor
467	Q6FWX3	CAGL0C02189g	SAH1	SAH1	49.16	9	19	10	18		S-adenosyl-L-homocysteine hydrolase, catabolizes S-adenosyl-L-homocysteine which is formed after donation of the activated methyl group of S-adenosyl-L-methionine (AdoMet) to an acceptor	Ortholog(s) have adenosylhomocysteinase activity, role in S-adenosylhomocysteine catabolic process, phosphatidylcholine biosynthetic process, triglyceride metabolic process and fungal biofilm matrix localization
468	Q6FX15	CAGL0C01265g	GLM4	NUP159	164.11	3	4	5	6		Nucleoporin, subunit of the Nup82 subcomplex of the nuclear pore; part of the nuclear pore that is found exclusively on the cytoplasmic side; required for mRNA export; regulates ADP release from the ATP-dependent RNA helicase Dbp5p	Gene used for molecular typing of C. glabrata strain isolates
469	Q6FX21 #$	CAGL0C01133g			106.73	1	2	2	3	Yes		Adhesin-like protein; belongs to adhesin cluster VII; predicted GPI anchor
470	Q6FX33	CAGL0C00671g		MSC3	89.27	3	5	3	5		Protein of unknown function, green fluorescent protein (GFP)-fusion protein localizes to the cell periphery; msc3 mutants are defective in directing meiotic recombination events to homologous chromatids; potential Cdc28p substrate	Ortholog(s) have role in reciprocal meiotic recombination
471	Q6FX48	CAGL0C00341g		RFA3	12.8	2	2	2	2		Subunit of heterotrimeric Replication Protein A (RPA), which is a highly conserved single-stranded DNA binding protein involved in DNA replication, repair, and recombination	Ortholog(s) have double-stranded DNA binding, sequence-specific DNA binding activity
472	Q6FX49	CAGL0C00319g		CPS1	65.03	6	16	4	11		Vacuolar carboxypeptidase yscS; expression is induced under low-nitrogen conditions	Ortholog(s) have carboxypeptidase activity, role in proteolysis involved in cellular protein catabolic process and fungal-type vacuole lumen localization
473	Q6FX51	CAGL0C00275g	HSP31	HSP31	25.48	10	11	9	11		Possible chaperone and cysteine protease with similarity to E. coli Hsp31; member of the DJ-1/ThiJ/PfpI superfamily, which includes human DJ-1 involved in Parkinson's disease; exists as a dimer and contains a putative metal-binding site	Putative cysteine protease; protein differentially expressed in azole resistant strain; gene is upregulated in azole-resistant strain
474	Q6FX78	CAGL0B01122g	SAM1	SAM1	41.7	11	16	9	13		S-adenosylmethionine synthetase, catalyzes transfer of the adenosyl group of ATP to the sulfur atom of methionine; one of two differentially regulated isozymes (Sam1p and Sam2p)	S-adenosylmethionine synthetase
475	Q6FX79	CAGL0B01100g		TFS1	23.01	13	49	10	33		Protein that interacts with and inhibits carboxypeptidase Y and Ira2p; phosphatidylethanolamine-binding protein (PEBP) family member; targets to vacuolar membranes during stationary phase; acetylated by NatB N-terminal acetyltransferase	Phosphatidylethanolamine-binding protein
476	Q6FX81	CAGL0B01012g		AGP1	68.83	2	3	2	4		Low-affinity amino acid permease with broad substrate range, involved in uptake of asparagine, glutamine, and other amino acids; expression is regulated by the SPS plasma membrane amino acid sensor system (Ssy1p-Ptr3p-Ssy5p)	Ortholog(s) have L-proline transmembrane transporter activity and role in amino acid transport, transmembrane transport
477	Q6FX95 #$	CAGL0B00704g	PDI1	PDI1	57.98	5	5	5	7		Protein disulfide isomerase; multifunctional protein resident in the endoplasmic reticulum lumen, essential for the formation of disulfide bonds in secretory and cell-surface proteins, unscrambles non-native disulfide bonds; forms a complex with Mnl1p that has exomannosidase activity, processing unfolded protein-bound Man8GlcNAc2 oligosaccharides to Man7GlcNAc2 which promotes degradation in the u…	Protein disulfide-isomerase
478	Q6FXA8	CAGL0B01419g	RIB4	RIB4	18.27	4	4	3	3		Lumazine synthase (6,7-dimethyl-8-ribityllumazine synthase, also known as DMRL synthase); catalyzes synthesis of immediate precursor to riboflavin	Ortholog(s) have 6,7-dimethyl-8-ribityllumazine synthase activity, riboflavin binding activity, role in riboflavin biosynthetic process and mitochondrial intermembrane space localization
479	Q6FXF1	CAGL0B02431g		NDI1	58.43	2	2	3	3		NADH:ubiquinone oxidoreductase, transfers electrons from NADH to ubiquinone in the respiratory chain but does not pump protons, in contrast to the higher eukaryotic multisubunit respiratory complex I; phosphorylated; homolog of human AMID	Ortholog(s) have NADH dehydrogenase (ubiquinone) activity and role in NADH oxidation, chronological cell aging, mitochondrial electron transport, NADH to ubiquinone, positive regulation of apoptotic process
480	Q6FXG5	CAGL0B03069g	TAL1	TAL1	36.7	27	65	27	67		Transaldolase, enzyme in the non-oxidative pentose phosphate pathway; converts sedoheptulose 7-phosphate and glyceraldehyde 3-phosphate to erythrose 4-phosphate and fructose 6-phosphate	Putative transaldolase; expression upregulated in biofilm vs planktonic cell culture
481	Q6FXG6	CAGL0B03047g	ILV5	ILV5	44.54	8	10	10	13		Bifunctional acetohydroxyacid reductoisomerase and mtDNA binding protein; involved in branched-chain amino acid biosynthesis and maintenance of wild-type mitochondrial DNA; found in mitochondrial nucleoids	Ketol-acid reducto-isomerase; mass spectrometry data indicates this gene is likely to be protein-coding
482	Q6FXH8	CAGL0B02794g		ADE13	54.25	3	3	3	3		Adenylosuccinate lyase, catalyzes two steps in the 'de novo' purine nucleotide biosynthetic pathway; expression is repressed by adenine and activated by Bas1p and Pho2p; mutations in human ortholog ADSL cause adenylosuccinase deficiency	Ortholog(s) have (S)-2-(5-amino-1-(5-phospho-D-ribosyl)imidazole-4-carboxamido)succinate AMP-lyase (fumarate-forming) activity, N6-(1,2-dicarboxyethyl)AMP AMP-lyase (fumarate-forming) activity
483	Q6FXI6	CAGL0B03619g		PRB1	50.01	7	19	8	39		Vacuolar proteinase B (yscB), a serine protease of the subtilisin family; involved in protein degradation in the vacuole and required for full protein degradation during sporulation; activity inhibited by Pbi2p	Ortholog(s) have serine-type endopeptidase activity
484	Q6FXJ6	CAGL0B03399g	RIF1	RIF1	190.09	4	5	3	3		Protein that binds to the Rap1p C-terminus and acts synergistically with Rif2p to help control telomere length and establish telomeric silencing; deletion results in telomere elongation	Protein involved in sub-telomeric silencing and regulation of biofilm formation; involved in regulation of telomere length; mutants display increased colonization of mouse kidneys relative to wild-type; required for silencing at MTL3
485	Q6FXK6	CAGL0B03179g		TOF2	101.93	3	3	4	4		Protein required for rDNA silencing and mitotic rDNA condensation; stimulates Cdc14p phosphatase activity and biphasic release to promote rDNA repeat segregation; required for condensin recruitment to the replication fork barrier site	Ortholog(s) have phosphatase activator activity, role in chromatin silencing at rDNA, protein localization to nucleolar rDNA repeats, rDNA condensation and nucleolus localization
486	Q6FXL7	CAGL0B04785g		SGF29	29.88	2	2	6	6		Component of the HAT/Core module of the SAGA, SLIK, and ADA complexes; HAT/Core module also contains Gcn5p, Ngg1p, and Ada2p; binds methylated histone H3K4; involved in transcriptional regulation through SAGA recruitment to target promoters and H3 acetylation	Protein of unknown function
487	Q6FXN4	CAGL0B04389g	CHS3	CHS3	131.35	4	4	8	8		Chitin synthase III, catalyzes the transfer of N-acetylglucosamine (GlcNAc) to chitin; required for synthesis of the majority of cell wall chitin, the chitin ring during bud emergence, and spore wall chitosan	Putative class IV chitin synthase; mutants display a significantly thickened cell wall mannoprotein layer; mutants are delayed in cell wall formation during protoplast regeneration
488	Q6FXP0	CAGL0B04257g		RPL4B	38.95	10	49	9	44		Protein component of the large (60S) ribosomal subunit, nearly identical to Rpl4Ap and has similarity to E. coli L4 and rat L4 ribosomal proteins	Ortholog(s) have cell surface, cytosolic large ribosomal subunit, membrane localization
489	Q6FXQ1	CAGL0B03993g		ILV3	62.54	3	4	2	2		Dihydroxyacid dehydratase, catalyzes third step in the common pathway leading to biosynthesis of branched-chain amino acids	Ortholog(s) have dihydroxy-acid dehydratase activity, role in branched-chain amino acid biosynthetic process and mitochondrion localization
490	Q6FXQ3	CAGL0B03949g		SNG1	72.44	2	2	1	2		Protein involved in resistance to nitrosoguanidine (MNNG) and 6-azauracil (6-AU); expression is regulated by transcription factors involved in multidrug resistance	Protein of unknown function
491	Q6FXQ8	CAGL0B03839g	MET3	MET3	57.19	5	5	4	4		ATP sulfurylase, catalyzes the primary step of intracellular sulfate activation, essential for assimilatory reduction of sulfate to sulfide, involved in methionine metabolism	Ortholog(s) have sulfate adenylyltransferase (ATP) activity
492	Q6FXR1	CAGL0B03773g		HIP1	65.8	8	8	7	10		High-affinity histidine permease, also involved in the transport of manganese ions	Has domain(s) with predicted role in amino acid transport, transmembrane transport and integral component of membrane, membrane localization
493	Q6FXR3	CAGL0B03685g		YCP4	29.73	8	12	9	14		Protein of unknown function, has sequence and structural similarity to flavodoxins; predicted to be palmitoylated; the authentic, non-tagged protein is detected in highly purified mitochondria in high-throughput studies	Putative flavodoxin
494	Q6FXR7	CAGL0A04697g		YMR31	13.57	3	4	4	5		Mitochondrial ribosomal protein of the small subunit, has similarity to human mitochondrial ribosomal protein MRP-S36	Ortholog(s) have oxoglutarate dehydrogenase (succinyl-transferring) activity, structural constituent of ribosome activity and role in 2-oxoglutarate metabolic process, tricarboxylic acid cycle
495	Q6FXS5	CAGL0A04521g		RPS8A	22.43	4	5	4	4		Protein component of the small (40S) ribosomal subunit; identical to Rps8Bp and has similarity to rat S8 ribosomal protein	Ortholog(s) have structural constituent of ribosome activity, role in maturation of SSU-rRNA from tricistronic rRNA transcript (SSU-rRNA, 5.8S rRNA, LSU-rRNA) and cytosolic small ribosomal subunit localization
496	Q6FXT8	CAGL0A04829g		HXK1	53.77	4	5	4	4		Hexokinase isoenzyme 1, a cytosolic protein that catalyzes phosphorylation of glucose during glucose metabolism; expression is highest during growth on non-glucose carbon sources; glucose-induced repression involves the hexokinase Hxk2p	Putative hexokinase isoenzyme 2; protein differentially expressed in azole resistant strain
497	Q6FXU5	CAGL0A00495g	PMA1	PMA1	98.31	41	133	41	138		Plasma membrane H+-ATPase, pumps protons out of the cell; major regulator of cytoplasmic pH and plasma membrane potential; P2-type ATPase; Hsp30p plays a role in Pma1p regulation; interactions with Std1p appear to propagate [GAR+]	Putative plasma membrane proton pump with a predicted role in pH homeostasis
498	Q6FXV1	CAGL0A00363g		LEU1	86.47	4	4	4	7		Isopropylmalate isomerase, catalyzes the second step in the leucine biosynthesis pathway	Ortholog(s) have 3-isopropylmalate dehydratase activity, role in leucine biosynthetic process and cytoplasmic stress granule, cytosol localization
499	Q6FXV9	CAGL0A00187g		PIB2	83.6	3	3	8	8		Protein binding phosphatidylinositol 3-phosphate, involved in telomere-proximal repression of gene expression; similar to Fab1 and Vps27	Has domain(s) with predicted metal ion binding activity
500	Q6FXW3	CAGL0A01111g		ATP15	7.43	5	10	4	8		Epsilon subunit of the F1 sector of mitochondrial F1F0 ATP synthase, which is a large, evolutionarily conserved enzyme complex required for ATP synthesis; phosphorylated	Ortholog(s) have proton-transporting ATP synthase activity, rotational mechanism activity, role in ATP synthesis coupled proton transport and mitochondrial proton-transporting ATP synthase, central stalk localization
501	Q6FXW8	CAGL0A01001g		YLR326W	25.32	2	4	2	4		Putative protein of unknown function, predicted to be palmitoylated	Ortholog of S. cerevisiae : YLR326W, C. albicans SC5314 : C2_00270C_A, C. dubliniensis CD36 : Cd36_15250, C. parapsilosis CDC317 : CPAR2_213510 and Candida tenuis NRRL Y-1498 : CANTEDRAFT_116710
502	Q6FXW9	CAGL0A00979g		RPL38	8.99	8	380	10	357		Protein component of the large (60S) ribosomal subunit, has similarity to rat L38 ribosomal protein	Ortholog(s) have cytosolic large ribosomal subunit, hyphal cell wall, yeast-form cell wall localization
503	Q6FXY9	CAGL0A01562g		RPL24A	17.48	6	7	6	7		Ribosomal protein L30 of the large (60S) ribosomal subunit, nearly identical to Rpl24Bp and has similarity to rat L24 ribosomal protein; not essential for translation but may be required for normal translation rate	Ortholog(s) have RNA binding activity and cytosolic large ribosomal subunit localization
504	Q6FXZ0	CAGL0A01540g		RPL30	11.36	9	13	7	10		Protein component of the large (60S) ribosomal subunit, has similarity to rat L30 ribosomal protein; involved in pre-rRNA processing in the nucleolus; autoregulates splicing of its transcript	Ortholog(s) have pre-mRNA 5'-splice site binding, structural constituent of ribosome activity, role in negative regulation of mRNA splicing, via spliceosome, rRNA processing and cytosolic large ribosomal subunit localization
505	Q6FXZ1 #$	CAGL0A01474g		SCW11	62.42	5	18	6	24		Cell wall protein with similarity to glucanases; may play a role in conjugation during mating based on its regulation by Ste12p	Ortholog(s) have cell surface, extracellular region, fungal-type cell wall localization
506	Q6FXZ7	CAGL0A01243g	GIT1	GIT1	58.77	2	2	2	3		Plasma membrane permease, mediates uptake of glycerophosphoinositol and glycerophosphocholine as sources of the nutrients inositol and phosphate; expression and transport rate are regulated by phosphate and inositol availability	Has domain(s) with predicted transmembrane transporter activity, role in transmembrane transport and integral component of membrane localization
507	Q6FXZ9	CAGL0A01199g	DIP5	DIP5	68.7	4	4	3	3		Dicarboxylic amino acid permease, mediates high-affinity and high-capacity transport of L-glutamate and L-aspartate; also a transporter for Gln, Asn, Ser, Ala, and Gly	Putative dicarboxylic amino acid permease
508	Q6FY04	CAGL0A02112g		DED81	61.7	2	2	2	2		Cytosolic asparaginyl-tRNA synthetase, required for protein synthesis, catalyzes the specific attachment of asparagine to its cognate tRNA	Ortholog(s) have asparagine-tRNA ligase activity and role in asparaginyl-tRNA aminoacylation
509	Q6FY05	CAGL0A02090g		YHR020W	76.25	3	3	4	4		Protein of unknown function that may interact with ribosomes, based on co-purification experiments; has similarity to proline-tRNA ligase; YHR020W is an essential gene	Ortholog(s) have proline-tRNA ligase activity and role in prolyl-tRNA aminoacylation
510	Q6FY08	CAGL0A02002g		YOL024W	15.02	4	11	8	18		Putative protein of unknown function; predicted to have thiol-disulfide oxidoreductase active site	Ortholog of S. cerevisiae : YOL024W and Saccharomyces cerevisiae S288C : YOL024W
511	Q6FY13 #$	CAGL0A01870g		PEP1	85.56	9	25	10	23		Type I transmembrane sorting receptor for multiple vacuolar hydrolases; cycles between the late-Golgi and prevacuolar endosome-like compartments	Has domain(s) with predicted integral component of membrane localization
512	Q6FY16	CAGL0A01804g	HXT1	HXT1	62.27	2	4	2	2		Low-affinity glucose transporter of the major facilitator superfamily, expression is induced by Hxk2p in the presence of glucose and repressed by Rgt1p when glucose is limiting	Ortholog(s) have fructose transmembrane transporter activity, pentose transmembrane transporter activity, role in glucose transmembrane transport, mannose transmembrane transport and plasma membrane localization
513	Q6FY17	CAGL0A01782g	HXT4	HXT4	62.88	11	21	8	17		High-affinity glucose transporter of the major facilitator superfamily, expression is induced by low levels of glucose and repressed by high levels of glucose	Ortholog(s) have glucose transmembrane transporter activity, pentose transmembrane transporter activity and plasma membrane localization
514	Q6FY28	CAGL0A02530g		TRR1	34.39	7	13	8	8		Cytoplasmic thioredoxin reductase, key regulatory enzyme that determines the redox state of the thioredoxin system, which acts as a disulfide reductase system and protects cells against both oxidative and reductive stress	Thioredoxin reductase
515	Q6FY33	CAGL0A02409g		PAL1	49.07	9	19	10	25		Protein of unknown function; green fluorescent protein (GFP)-fusion protein localizes to the cell periphery and bud neck; potential Cdc28p substrate	Ortholog(s) have cell cortex localization
516	Q6FY37	CAGL0A02321g	HXT3	HXT5	61.48	6	9	5	7		Hexose transporter with moderate affinity for glucose, induced in the presence of non-fermentable carbon sources, induced by a decrease in growth rate, contains an extended N-terminal domain relative to other HXTs	Ortholog(s) have fructose transmembrane transporter activity, glucose transmembrane transporter activity, mannose transmembrane transporter activity and role in fructose import across plasma membrane, glucose import across plasma membrane
517	Q6FY38 #$	CAGL0A02299g			31.1	2	3	3	4			Protein of unknown function
518	Q6FY42	CAGL0A02211g	HXT6/7	HXT7	61.51	2	4	2	6		High-affinity glucose transporter of the major facilitator superfamily, nearly identical to Hxt6p, expressed at high basal levels relative to other HXTs, expression repressed by high glucose levels	Ortholog(s) have glucose transmembrane transporter activity, pentose transmembrane transporter activity, role in glucose transmembrane transport and plasma membrane localization
519	Q6FY72	CAGL0A03542g	COX12	COX12	9.76	4	12	4	17		Subunit VIb of cytochrome c oxidase, which is the terminal member of the mitochondrial inner membrane electron transport chain; required for assembly of cytochrome c oxidase but not required for activity after assembly; phosphorylated	Cytochrome c oxidase
520	Q6FY79	CAGL0A03366g		ADE16	64.94	9	9	8	9		Enzyme of 'de novo' purine biosynthesis containing both 5-aminoimidazole-4-carboxamide ribonucleotide transformylase and inosine monophosphate cyclohydrolase activities, isozyme of Ade17p; ade16 ade17 mutants require adenine and histidine	Ortholog(s) have IMP cyclohydrolase activity, phosphoribosylaminoimidazolecarboxamide formyltransferase activity, role in 'de novo' IMP biosynthetic process and cytosol localization
521	Q6FYA5	CAGL0A03278g		RPL19A	21.69	6	6	7	10		Protein component of the large (60S) ribosomal subunit, nearly identical to Rpl19Bp and has similarity to rat L19 ribosomal protein; rpl19a and rpl19b single null mutations result in slow growth, while the double null mutation is lethal	Has domain(s) with predicted structural constituent of ribosome activity, role in translation and ribosome localization
522	Q6FYA7	CAGL0A03234g	EFT2	EFT2	93.27	9	11	6	7		Elongation factor 2 (EF-2), also encoded by EFT1; catalyzes ribosomal translocation during protein synthesis; contains diphthamide, the unique posttranslationally modified histidine residue specifically ADP-ribosylated by diphtheria toxin	Elongation factor 2
523	Q6FYB0	CAGL0A03168g		RPP2B	10.95	6	7	6	7		Ribosomal protein P2 beta, a component of the ribosomal stalk, which is involved in the interaction between translational elongation factors and the ribosome; regulates the accumulation of P1 (Rpp1Ap and Rpp1Bp) in the cytoplasm	60S acidic ribosomal protein
524	Q6FYB1 #	CAGL0A03146g		YDR381C-A	12.7	3	5	3	4		Protein of unknown function, localized to the mitochondrial outer membrane	Ortholog of S. cerevisiae : YDR381C-A and Saccharomyces cerevisiae S288C : YDR381C-A
525	Q6FYB2	CAGL0A03117g		YRA1	25.25	17	48	16	45		RNA binding protein required for export of poly(A)+ mRNA from the nucleus; proposed to couple mRNA export with 3' end processing via its interactions with Mex67p and Pcf11p; functionally redundant with Yra2p, another REF family member	Ortholog(s) have ATP-dependent RNA helicase inhibitor activity, RNA binding activity
526	Q6FYB5	CAGL0A03058g		RGA2	87.11	2	3	2	4		GTPase-activating protein for the polarity-establishment protein Cdc42p; implicated in control of septin organization, pheromone response, and haploid invasive growth; regulated by Pho85p and Cdc28p	Ortholog(s) have GTPase activator activity and role in hyphal growth, regulation of GTPase activity, septin ring organization, small GTPase mediated signal transduction
527	Q76IQ2	CAGL0J02244g		PMI40	47.56	3	4	4	4		Mannose-6-phosphate isomerase, catalyzes the interconversion of fructose-6-P and mannose-6-P; required for early steps in protein mannosylation	Ortholog(s) have role in hyphal growth
528	Q876N3	CAGL0C05379g	SSB1	SSB1	66.36	12	14	11	13		Cytoplasmic ATPase that is a ribosome-associated molecular chaperone, functions with J-protein partner Zuo1p; may be involved in folding of newly-made polypeptide chains; member of the HSP70 family; interacts with phosphatase subunit Reg1p	Heat shock protein
529	Q8NIG3	CAGL0C04136g		HHF1	11.35	4	7	5	5		Histone H4, core histone protein required for chromatin assembly and chromosome function; one of two identical histone proteins (see also HHF2); contributes to telomeric silencing; N-terminal domain involved in maintaining genomic integrity	Ortholog(s) have role in histone H3-K79 methylation, sexual sporulation resulting in formation of a cellular spore, transfer RNA gene-mediated silencing and replication fork protection complex localization
530	Q8TG06 #$	CAGL0J11748g	PLB2	PLB2	74.58	19	68	20	80	Yes	Phospholipase B (lysophospholipase) involved in phospholipid metabolism; displays transacylase activity in vitro; overproduction confers resistance to lysophosphatidylcholine	Putative phospholipase B; predicted GPI-anchor
531	Q8TG07 #$	CAGL0J11770g	PLB1	PLB1	71.6	16	62	18	65	Yes	Phospholipase B (lysophospholipase) involved in lipid metabolism, required for deacylation of phosphatidylcholine and phosphatidylethanolamine but not phosphatidylinositol	Putative phospholipase B; predicted GPI-anchor
532	Q96WT3 #$	CAGL0F06413g	FET3	FET3	71.97	11	24	13	32		Ferro-O2-oxidoreductase required for high-affinity iron uptake and involved in mediating resistance to copper ion toxicity, belongs to class of integral membrane multicopper oxidases	Putative copper ferroxidase involved in iron uptake
533	Q9Y725	CAGL0D01034g	VIG9	PSA1	39.27	6	9	4	8		GDP-mannose pyrophosphorylase (mannose-1-phosphate guanyltransferase), synthesizes GDP-mannose from GTP and mannose-1-phosphate in cell wall biosynthesis; required for normal cell wall structure	GDP-mannose pyrophosphorylase involved in the synthesis of GDP-mannose for protein glycosylation	DAVID_unmapped_id
534	B4UMZ4	CAGL0E02315g		HTZ1	14.2	1	2	1	2		Histone variant H2AZ; exchanged for histone H2A in nucleosomes by the SWR1 complex; involved in transcriptional regulation through prevention of the spread of silent heterochromatin; Htz1p-containing nucleosomes facilitate RNA Pol II passage by affecting correct assembly and modification status of RNA Pol II elongation complexes and by favoring efficient nucleosome remodeling	Ortholog(s) have chromatin binding activity
535	O93796	CAGL0B03487g	TEF3	YEF3	115.9	2	2	2	2		Translation elongation factor 3; contains two ABC cassettes; binds and hydrolyzes ATP; YEF3 has a paralog, HEF3, that arose from the whole genome duplication	Translation elongation factor eEF3
536	Q6FJL5	CAGL0M05357g		BEM1	63	1	2	2	2		Protein containing SH3-domains; involved in establishing cell polarity and morphogenesis; functions as a scaffold protein for complexes that include Cdc24p, Ste5p, Ste20p, and Rsr1p	Ortholog(s) have phosphatidylinositol-3-phosphate binding, protein binding, bridging, protein-containing complex scaffold activity
537	Q6FLP9 #$	CAGL0L01727g		DCW1	49.7	1	2	2	4	Yes	Putative mannosidase; GPI-anchored membrane protein required for cell wall biosynthesis in bud formation;homologous to Dfg5p	Putative glycoside hydrolase; predicted GPI-anchor
538	Q6FLV6	CAGL0L00341g		EBP2	44.8	2	3	2	2		Required for 25S rRNA maturation and 60S ribosomal subunit assembly; localizes to the nucleolus and in foci along nuclear periphery; constituent of 66S pre-ribosomal particles; cooperates with Rrs1p and Mps3p to mediate telomere clustering by binding Sir4p, but is not involved in telomere tethering	Ortholog(s) have role in nuclear division, rRNA processing, ribosomal large subunit biogenesis and nuclear periphery, nucleolus, preribosome, large subunit precursor localization
539	Q6FND4	CAGL0K00825g		SER2	32.7	1	2	2	3		Phosphoserine phosphatase of the phosphoglycerate pathway; involved in serine and glycine biosynthesis, expression is regulated by the available nitrogen source	Has domain(s) with predicted phosphatase activity, phosphoserine phosphatase activity and role in L-serine biosynthetic process, metabolic process
540	Q6FPW3	CAGL0J00451g		TDH3	35.9	3	9	2	2		Glyceraldehyde-3-phosphate dehydrogenase (GAPDH), isozyme 3; involved in glycolysis and gluconeogenesis; tetramer that catalyzes the reaction of glyceraldehyde-3-phosphate to 1,3 bis-phosphoglycerate; detected in the cytoplasm and cell wall; GAPDH-derived antimicrobial peptides secreted by S. cerevisiae are active against a wide variety of wine-related yeasts and bacteria; binds AU-rich RNA	Putative glyceraldehyde-3-phosphate dehydrogenase; protein differentially expressed in azole resistant strain; expression downregulated in biofilm vs planktonic cell culture
541	Q6FQZ9	CAGL0I02156g		YAP1801	80.3	1	2	1	2		Protein of the AP180 family, involved in clathrin cage assembly; binds Pan1p and clathrin; YAP1801 has a paralog, YAP1802, that arose from the whole genome duplication	Ortholog(s) have clathrin binding activity
542	Q6FR60 #$	CAGL0I00704g		SWP1	31.1	1	2	3	4		Delta subunit of the oligosaccharyl transferase glycoprotein complex; complex is required for N-linked glycosylation of proteins in the endoplasmic reticulum	Ortholog(s) have dolichyl-diphosphooligosaccharide-protein glycotransferase activity
543	Q6FTV7	CAGL0F08481g		YGR266W	80.2	2	2	4	4		Protein of unknown function; predicted to contain a single transmembrane domain; mutant has increased aneuploidy tolerance; localized to both the mitochondrial outer membrane and the plasma membrane; protein abundance increases in response to DNA replication stress	Ortholog(s) have plasma membrane localization
544	Q6FUM5	CAGL0F02255g		YPI1	17	1	2	3	4		Regulatory subunit of the type I protein phosphatase (PP1) Glc7p; Glc7p participates in the regulation of a variety of metabolic processes including mitosis and glycogen metabolism; in vitro evidence suggests Ypi1p is an inhibitor of Glc7p while in vivo evidence suggests it is an activator; overproduction causes decreased cellular content of glycogen; partial depletion causes lithium sensitivity,…	Ortholog(s) have protein phosphatase activator activity, protein serine/threonine phosphatase inhibitor activity
545	Q6FUR2	CAGL0F01397g		RTS1	82.4	1	2	1	2		B-type regulatory subunit of protein phosphatase 2A (PP2A); Rts1p and Cdc55p are alternative regulatory subunits for PP2A catalytic subunits, Pph21p and Pph22p; PP2A-Rts1p protects cohesin when recruited by Sgo1p to the pericentromere; highly enriched at centromeres in the absence of Cdc55p; required for maintenance of septin ring organization during cytokinesis, for ring disassembly in G1 and fo…	Ortholog(s) have protein phosphatase regulator activity
546	Q6FX01	CAGL0C01573g		ARO4	38.6	3	5	1	2		3-deoxy-D-arabino-heptulosonate-7-phosphate (DAHP) synthase; catalyzes the first step in aromatic amino acid biosynthesis and is feedback-inhibited by tyrosine or high concentrations of phenylalanine or tryptophan; relative distribution to the nucleus increases upon DNA replication stress	Ortholog(s) have 3-deoxy-7-phosphoheptulonate synthase activity and role in aromatic amino acid family biosynthetic process
547	Q6FXE4	CAGL0B02585g		RTN1	33.1	2	2	1	2		Reticulon protein; involved in nuclear pore assembly and maintenance of tubular ER morphology; promotes membrane curvature; regulates the ER asymmetry-induced inheritance block during ER stress; role in ER-derived peroxisomal biogenesis; increases tubular ER when overexpressed; mutants have reduced phosphatidylserine transfer between the ER and mitochondria; interacts with exocyst subunit Sec6p, …	Ortholog(s) have role in ER-dependent peroxisome organization, endoplasmic reticulum inheritance, endoplasmic reticulum tubular network maintenance, nuclear pore complex assembly, response to endoplasmic reticulum stress
548	Q6FY41	CAGL0A02233g	HXT4/6/7	HXT6	61.2	1	2	1	2		High-affinity glucose transporter; member of the major facilitator superfamily, nearly identical to Hxt7p, expressed at high basal levels relative to other HXTs, repression of expression by high glucose requires SNF3; HXT6 has a paralog, HXT1, that arose from the whole genome duplication	Ortholog(s) have glucose transmembrane transporter activity and plasma membrane localization

## Sheet: Table S5
Table S5: Functional classification of putative GPI-anchored proteins identified in secretomes of wild-type and Cgyps1-11Δ strains.
wt_secretome
Sr. No.	Adhesive proteins		Glycoside hydrolases		Aspartic proteases		Phospholipases		Cell wall biogenesis		Structural wall proteins		Others
	CAGL ID	Cg/common Name	CAGL ID	Cg/common Name	CAGL ID	Cg/common Name	CAGL ID	Cg/common Name	CAGL ID	Cg/common Name	CAGL ID	Cg/common Name	CAGL ID	Cg/common Name
1	CAGL0C00110g	EPA6	CAGL0F03883g	GAS4	CAGL0A02431g	YPS7	CAGL0J11770g	PLB1	CAGL0E04620g	PST1	CAGL0F01463g	TIR2	No protein
2			CAGL0G00286g	GAS1	CAGL0E01727g	YPS3	CAGL0J11748g	PLB2	CAGL0M01826g	ECM33	CAGL0F07579g	CWP1.2
3			CAGL0M13849g	GAS2	CAGL0E01771g	YPS5					CAGL0F07601g	CWP1.1
4			CAGL0C02211g	UTR2	CAGL0E01793g	YPS6					CAGL0J01463g	CWP1
5			CAGL0G09449g	CRH1	CAGL0E01837g	YPS9
6			CAGL0L01727g	DCW1	CAGL0E01859g	YPS10
7			CAGL0M05049g	DFG5	CAGL0M04191g	YPS1
8			CAGL0D02530g	EGT2
9			CAGL0M08756g	EXG2
Total = 25
Cgyps1-11Δ _secretome
Sr. No.	Adhesive proteins		Glycoside hydrolases		Aspartic proteases		Phospholipases		Cell wall biogenesis		Structural wall proteins		Others
	CAGL ID	Cg/common Name	CAGL ID	Cg/common Name	CAGL ID	Cg/common Name	CAGL ID	Cg/common Name	CAGL ID	Cg/common Name	CAGL ID	Cg/common Name	CAGL ID	Cg/common Name
1	CAGL0E06644g	EPA1	CAGL0F03883g	GAS4	No protein		CAGL0J11770g	PLB1	CAGL0E04620g	PST1	CAGL0F01463g	TIR2	CAGL0F01683g	RPL22A
2	CAGL0I00220g	EPA23	CAGL0G00286g	GAS1			CAGL0J11748g	PLB2	CAGL0M01826g	ECM33	CAGL0F07579g	CWP1.2
3	CAGL0C01133g	Unknown	CAGL0M13849g	GAS2							CAGL0F07601g	CWP1.1
4			CAGL0C02211g	UTR2							CAGL0J01463g	CWP1
5			CAGL0G09449g	CRH1
6			CAGL0L01727g	DCW1
7			CAGL0D02530g	EGT2
8			CAGL0M08756g	EXG2
Total = 20 proteins

## Sheet: Table S6
Table S6: DeepLoc 1.0 web server-based subcellular localization analysis of proteins identified in the wild-type secretome.
Sr. No.	Entry ID	Localization	Type	Nucleus	Cytoplasm	Extracellular	Mitochondrion	Cell membrane	Endoplasmic reticulum	Plastid	Golgi apparatus	Lysosome/Vacuole	Peroxisome
Cell membrane
1	CAGL0F03003g	Cell membrane	Membrane	0.0007	0.0001	0	0.2724	0.6706	0.038	0.0001	0.0069	0.0035	0.0078
2	CAGL0E01881g	Cell membrane	Membrane	0.0001	0.0001	0.1325	0.0012	0.8461	0.012	0.0005	0.0013	0.0063	0
3	CAGL0C00110g	Cell membrane	Membrane	0.0001	0.0002	0.1152	0.0001	0.5918	0.1923	0.0001	0.0105	0.0896	0.0001
4	CAGL0M05049g	Cell membrane	Membrane	0	0	0.0754	0.0034	0.5081	0.1867	0.0018	0.0101	0.2145	0
5	CAGL0E01859g	Cell membrane	Membrane	0	0	0.0253	0.0002	0.9615	0.0084	0	0.0009	0.0036	0
6	CAGL0E01793g	Cell membrane	Membrane	0	0	0.0528	0.001	0.9309	0.0067	0	0.0004	0.0082	0
7	CAGL0E01771g	Cell membrane	Membrane	0	0	0.0001	0.0001	0.9464	0.0473	0	0.0011	0.0051	0
8	CAGL0E01837g	Cell membrane	Membrane	0	0	0.0092	0.0004	0.9809	0.005	0	0.0004	0.0042	0
9	CAGL0E01727g	Cell membrane	Membrane	0	0	0.0387	0.0008	0.9525	0.0043	0.0001	0.0004	0.0032	0.0001
10	CAGL0A02431g	Cell membrane	Membrane	0	0	0	0.0001	0.9346	0.0615	0	0.0012	0.0026	0
11	CAGL0M04191g	Cell membrane	Membrane	0	0	0.0001	0.0002	0.9868	0.0072	0	0.001	0.0048	0
12	CAGL0L08294g	Cell membrane	Membrane	0	0	0	0.0001	0.9997	0.0001	0	0	0	0
13	CAGL0L12144g	Cell membrane	Membrane	0	0	0.0001	0.0015	0.66	0.0306	0	0.0131	0.2946	0.0001
14	CAGL0C02211g	Cell membrane	Membrane	0.0001	0	0.0492	0.0084	0.5895	0.289	0	0.0235	0.0402	0
15	CAGL0D02530g	Cell membrane	Membrane	0.0002	0.0002	0.0789	0.0003	0.5116	0.2879	0.0002	0.0188	0.1018	0.0001
16	CAGL0D03498g	Cell membrane	Soluble	0.0325	0.1816	0.1003	0.203	0.223	0.0363	0.0046	0.1268	0.0758	0.0162
17	CAGL0E04620g	Cell membrane	Membrane	0	0	0.1867	0.001	0.3537	0.2487	0	0.0063	0.2036	0
18	CAGL0F01287g	Cell membrane	Membrane	0	0	0.149	0.0024	0.7242	0.113	0	0.0064	0.005	0
19	CAGL0F03883g	Cell membrane	Membrane	0	0	0.2603	0.0001	0.6549	0.0306	0	0.0017	0.0523	0
20	CAGL0F05115g	Cell membrane	Membrane	0.0086	0.0058	0.0181	0.0689	0.6566	0.0204	0.0039	0.0197	0.1896	0.0085
21	CAGL0J04466g	Cell membrane	Membrane	0	0	0	0.0002	0.7654	0.0424	0	0.0176	0.1743	0
22	CAGL0J11770g	Cell membrane	Membrane	0	0.0001	0.2401	0.001	0.4022	0.2018	0.0004	0.0048	0.1497	0
23	CAGL0J11748g	Cell membrane	Membrane	0	0	0.2513	0.0002	0.4168	0.2371	0.0002	0.0102	0.0843	0
24	CAGL0L01727g	Cell membrane	Membrane	0	0	0.0712	0.002	0.6117	0.1786	0.001	0.0142	0.1213	0
25	CAGL0M08206g	Cell membrane	Membrane	0.0006	0.0005	0.0078	0.0024	0.5782	0.1614	0.0013	0.0535	0.1937	0.0005
26	CAGL0M08756g	Cell membrane	Membrane	0	0	0.1505	0.0002	0.5588	0.2335	0.0001	0.0067	0.0501	0
27	CAGL0M01826g	Cell membrane	Membrane	0	0	0.0002	0.0004	0.4377	0.4347	0	0.0144	0.1125	0
28	CAGL0G09449g	Cell membrane	Membrane	0.0001	0	0.0337	0.0046	0.6059	0.3227	0	0.0254	0.0075	0
29	CAGL0M13849g	Cell membrane	Membrane	0	0	0.1003	0.0042	0.7054	0.0914	0	0.0207	0.0778	0
30	CAGL0G00286g	Cell membrane	Membrane	0	0	0.2626	0.0008	0.6158	0.06	0	0.006	0.0546	0
Cytoplasm
31	CAGL0I03168g	Cytoplasm	Soluble	0.1759	0.4315	0.0102	0.0291	0.0206	0.0174	0.0103	0.029	0.027	0.2491
32	CAGL0A00979g	Cytoplasm	Soluble	0.1696	0.7899	0.0001	0.0376	0.0026	0	0.0001	0	0	0.0001
33	CAGL0A01540g	Cytoplasm	Soluble	0.0894	0.6441	0.004	0.2419	0.0016	0.001	0.0005	0.0001	0.0004	0.017
34	CAGL0A03278g	Cytoplasm	Soluble	0.2639	0.4274	0.0003	0.3079	0.0003	0	0	0	0	0.0003
35	CAGL0C04741g	Cytoplasm	Soluble	0.0002	0.6131	0.0049	0.0893	0.002	0.021	0.0283	0.0001	0.0023	0.2387
36	CAGL0B01100g	Cytoplasm	Soluble	0.0277	0.5673	0.0184	0.0616	0.0095	0.0113	0.0106	0.0106	0.119	0.1642
37	CAGL0D00858g	Cytoplasm	Soluble	0.205	0.5672	0.074	0.1533	0.0002	0	0	0	0	0.0003
38	CAGL0E02255g	Cytoplasm	Soluble	0.1058	0.2985	0.0015	0.1281	0.1263	0.0594	0.1116	0.0597	0.1086	0.0005
39	CAGL0E01991g	Cytoplasm	Soluble	0.2452	0.5671	0.0035	0.0409	0.005	0.0008	0.0018	0.0003	0.0002	0.1353
40	CAGL0E00869g	Cytoplasm	Soluble	0.2798	0.7188	0.0002	0.0002	0.0001	0.0003	0	0.0001	0.0003	0.0001
41	CAGL0D01188g	Cytoplasm	Soluble	0.0567	0.9147	0.0018	0.0189	0.001	0.0008	0.002	0.0001	0.0009	0.0032
42	CAGL0H08734g	Cytoplasm	Soluble	0.0002	0.9966	0.0014	0.0017	0	0	0	0	0	0.0001
43	CAGL0H04521g	Cytoplasm	Soluble	0.0488	0.951	0	0.0001	0.0001	0	0	0	0	0
44	CAGL0I07843g	Cytoplasm	Soluble	0.0014	0.5499	0.002	0.0855	0.0008	0.0008	0.0135	0	0.0007	0.3454
45	CAGL0K10906g	Cytoplasm	Soluble	0.0035	0.9946	0	0.0015	0.0001	0	0	0	0	0.0004
46	CAGL0K00803g	Cytoplasm	Soluble	0.2617	0.6257	0.0006	0.0036	0.0001	0.0003	0.1064	0	0.0017	0.0001
47	CAGL0J03234g	Cytoplasm	Soluble	0.3732	0.4813	0.0008	0.1175	0.0007	0.0016	0.0012	0.0001	0.0003	0.0233
48	CAGL0J00451g	Cytoplasm	Soluble	0.0012	0.8501	0.0003	0.0836	0	0.0001	0.0089	0	0.0006	0.0551
49	CAGL0K04125g	Cytoplasm	Soluble	0.0791	0.7788	0.0025	0.1046	0.0065	0.0037	0.0097	0.0004	0.0122	0.0024
50	CAGL0K06149g	Cytoplasm	Soluble	0.0391	0.96	0	0.0004	0.0001	0	0	0	0	0.0003
51	CAGL0K11858g	Cytoplasm	Soluble	0.0001	0.6585	0.0007	0.0101	0.0002	0.0019	0.0012	0	0.0001	0.3272
52	CAGL0K12694g	Cytoplasm	Soluble	0.0187	0.8779	0.0005	0.0031	0.0312	0.0068	0.002	0.0225	0.0184	0.0189
53	CAGL0L07722g	Cytoplasm	Soluble	0.0012	0.8448	0.0014	0.0804	0.0008	0.0011	0.005	0	0.0012	0.0641
54	CAGL0K10384g	Cytoplasm	Soluble	0.1366	0.5761	0.0006	0.0005	0.0539	0.0023	0.0003	0.1001	0.1276	0.002
55	CAGL0M10241g	Cytoplasm	Soluble	0.0956	0.7534	0.0336	0.0603	0.0344	0.0053	0.0009	0.0014	0.0076	0.0075
56	CAGL0M07161g	Cytoplasm	Soluble	0.4784	0.5091	0.0001	0.0006	0.0006	0.0009	0.0001	0.0021	0.0065	0.0016
57	CAGL0M11704g	Cytoplasm	Soluble	0.0067	0.9153	0.0014	0.008	0.0001	0.0008	0.0338	0	0.0002	0.0337
58	CAGL0G09383g	Cytoplasm	Soluble	0.0012	0.8461	0.0003	0.0881	0	0.0001	0.0092	0	0.0006	0.0544
59	CAGL0M12034g	Cytoplasm	Soluble	0.004	0.9598	0.0006	0.0142	0.0001	0.0003	0.0041	0	0.0009	0.016
60	CAGL0G03289g	Cytoplasm	Soluble	0.0077	0.8747	0.0005	0.0177	0.004	0.0082	0.0311	0.0063	0.0127	0.0372
61	CAGL0G08360g	Cytoplasm	Soluble	0.0981	0.8586	0.0007	0.002	0.0029	0.0127	0.0004	0.0097	0.0101	0.0048
62	CAGL0G09713g	Cytoplasm	Soluble	0.0257	0.8772	0.0008	0.0961	0	0	0	0	0	0
63	CAGL0G02475g	Cytoplasm	Soluble	0.2041	0.7922	0.0004	0.0026	0.0004	0	0	0	0	0.0001
64	CAGL0G08173g	Cytoplasm	Soluble	0.4032	0.5954	0.0011	0.0001	0.0001	0	0	0	0	0
65	CAGL0I02486g	Cytoplasm	Soluble	0.0133	0.9176	0.0009	0.031	0.0005	0.0002	0.0046	0	0.0011	0.0309
Endoplasmic reticulum
66	CAGL0E04664g	Endoplasmic reticulum	Membrane	0	0.0003	0.0296	0.0002	0.0023	0.9026	0	0.0003	0.0646	0
67	CAGL0A00495g	Endoplasmic reticulum	Membrane	0.0001	0	0	0.0012	0.1917	0.5412	0.0001	0.1307	0.1348	0.0002
68	CAGL0D02948g	Endoplasmic reticulum	Soluble	0.0003	0.0117	0.0236	0.0097	0.0006	0.945	0.0028	0.0003	0.0054	0.0005
69	CAGL0F06413g	Endoplasmic reticulum	Membrane	0.0001	0.0002	0.1202	0.0014	0.2995	0.3504	0.0003	0.0112	0.2165	0.0002
70	CAGL0H01529g	Endoplasmic reticulum	Soluble	0	0.0291	0.2906	0.0058	0.0003	0.5911	0.0026	0	0.0804	0.0001
71	CAGL0G07887g	Endoplasmic reticulum	Membrane	0.0094	0.0014	0.0011	0.0269	0.0263	0.7481	0.0007	0.0617	0.1202	0.0043
Extracellular
72	CAGL0I06204g	Extracellular	Soluble	0	0.0026	0.9717	0.0002	0.0076	0.0094	0	0.0011	0.0074	0
73	CAGL0A01474g	Extracellular	Soluble	0	0.0028	0.8335	0.0011	0.0162	0.0669	0.0006	0.0017	0.0772	0
74	CAGL0A01870g	Extracellular	Soluble	0	0	0.8074	0	0.03	0.0438	0.0007	0.0011	0.117	0
75	CAGL0C00363g	Extracellular	Soluble	0	0.0001	0.9884	0	0.0001	0.01	0	0	0.0013	0
76	CAGL0E02915g	Extracellular	Soluble	0.0012	0.0308	0.8275	0.0201	0.0146	0.0545	0.0019	0.0029	0.0462	0.0003
77	CAGL0F01463g	Extracellular	Soluble	0	0	0.4121	0.003	0.212	0.3062	0.0001	0.0004	0.0662	0
78	CAGL0I06160g	Extracellular	Soluble	0.0001	0.0022	0.9885	0	0.0031	0.0042	0	0.0002	0.0017	0
79	CAGL0G07667g	Extracellular	Soluble	0	0	0.9999	0	0	0	0	0	0.0001	0
80	CAGL0G00220g	Extracellular	Soluble	0	0	0.9961	0	0	0.0021	0	0	0.0017	0
81	CAGL0G09515g	Extracellular	Soluble	0	0	0.9982	0	0	0.0003	0.0009	0	0.0006	0
82	CAGL0F07579g	Extracellular	Soluble	0.0014	0.0114	0.9784	0.0001	0.0029	0.0032	0	0.0001	0.0026	0
83	CAGL0F07601g	Extracellular	Soluble	0.0007	0.0121	0.8611	0.0005	0.0324	0.0419	0	0.0039	0.0473	0.0001
84	CAGL0I06182g	Extracellular	Soluble	0.0013	0.0144	0.9398	0.001	0.0113	0.0152	0.0001	0.0078	0.0086	0.0003
85	CAGL0J01463g	Extracellular	Soluble	0	0.0024	0.5496	0.0056	0.185	0.1621	0.0002	0.0063	0.0886	0.0002
86	CAGL0J06050g	Extracellular	Soluble	0	0.0009	0.9735	0	0.0004	0.0078	0	0	0.0173	0
87	CAGL0J09922g	Extracellular	Soluble	0	0	1	0	0	0	0	0	0	0
88	CAGL0K07546g	Extracellular	Soluble	0	0.001	0.8194	0.0001	0.0002	0.1542	0	0	0.0252	0
89	CAGL0L05434g	Extracellular	Soluble	0	0	0.9998	0	0	0	0	0	0.0002	0
90	CAGL0L03289g	Extracellular	Soluble	0	0	0.9999	0	0	0	0	0	0.0001	0
91	CAGL0M08514g	Extracellular	Soluble	0.0002	0.007	0.9791	0.0001	0.0031	0.0025	0	0.0003	0.0077	0
92	CAGL0M08492g	Extracellular	Soluble	0	0.0001	0.9987	0	0	0.0009	0	0	0.0003	0
93	CAGL0M05599g	Extracellular	Soluble	0	0	0.9753	0	0.0002	0.0185	0	0	0.006	0
94	CAGL0M09779g	Extracellular	Soluble	0	0	0.9979	0	0	0.0021	0	0	0	0
95	CAGL0M03597g	Extracellular	Soluble	0.003	0.0107	0.7151	0.0005	0.027	0.0846	0.0001	0.0213	0.1376	0
96	CAGL0M13805g	Extracellular	Soluble	0	0	0.9767	0	0.0001	0.0037	0	0	0.0194	0
97	CAGL0G08668g	Extracellular	Soluble	0	0	0.9999	0	0	0.0001	0	0	0	0
98	CAGL0G00308g	Extracellular	Soluble	0	0	0.9909	0	0	0.0039	0	0	0.0052	0
99	CAGL0I00484g	Extracellular	Soluble	0	0	0.9998	0	0	0.0002	0	0	0	0
Golgi apparatus
100	CAGL0C02453g	Golgi apparatus	Membrane	0.0007	0.001	0.0004	0.0018	0.036	0.0197	0.0002	0.7603	0.1795	0.0003
Lysosome/Vacuole
101	CAGL0F08833g	Lysosome/Vacuole	Membrane	0	0	0.0354	0.0004	0.2816	0.28	0.0024	0.052	0.3479	0.0001
102	CAGL0K01353g	Lysosome/Vacuole	Soluble	0	0.0001	0.3587	0.0001	0.0012	0.0106	0.0067	0	0.6225	0
103	CAGL0K05137g	Lysosome/Vacuole	Membrane	0.0004	0.0039	0.0549	0.0198	0.2453	0.2067	0.0403	0.0282	0.3966	0.0039
Mitochondrion
104	CAGL0K06033g	Mitochondrion	Soluble	0.2257	0.2391	0.0311	0.4779	0.0085	0.0045	0.0005	0.0018	0.0021	0.0089
105	CAGL0A03542g	Mitochondrion	Soluble	0.0334	0.0031	0.0406	0.9154	0.0014	0.0003	0.0047	0.0004	0.0006	0
106	CAGL0I01408g	Mitochondrion	Soluble	0.0073	0.2917	0.0687	0.5846	0.0006	0.0003	0.0273	0	0.0002	0.0191
107	CAGL0I09394g	Mitochondrion	Soluble	0	0.0002	0.0001	0.9994	0.0001	0	0.0001	0	0	0.0001
108	CAGL0G03575g	Mitochondrion	Soluble	0.0149	0.0595	0.0224	0.8447	0.0141	0.0011	0.0097	0.0009	0.0006	0.032
109	CAGL0H06127g	Mitochondrion	Membrane	0.0001	0.0001	0.0003	0.9992	0	0	0.0001	0	0.0001	0
Nucleus
110	CAGL0A03117g	Nucleus	Soluble	0.9991	0.0009	0	0	0	0	0	0	0	0
111	CAGL0C04389g	Nucleus	Soluble	0.912	0.0872	0	0.0002	0.0001	0.0001	0	0	0	0.0005
112	CAGL0C04411g	Nucleus	Soluble	0.808	0.1448	0.0032	0.041	0.0015	0	0.0001	0.0002	0.0001	0.001
113	CAGL0C02475g	Nucleus	Soluble	1	0	0	0	0	0	0	0	0	0
114	CAGL0D05214g	Nucleus	Soluble	0.6428	0.3	0.0002	0.0568	0.0001	0	0	0	0	0.0001
115	CAGL0H08541g	Nucleus	Soluble	0.638	0.3366	0.0001	0.0249	0.0001	0.0001	0	0	0	0.0001
116	CAGL0J09086g	Nucleus	Soluble	0.721	0.2259	0	0.0512	0.0002	0.0005	0	0	0	0.0012
117	CAGL0M04983g	Nucleus	Soluble	0.9336	0.033	0.0101	0.0172	0.0033	0.0018	0.0002	0.0008	0.0001	0
118	CAGL0M04543g	Nucleus	Soluble	0.4575	0.3245	0.0015	0.0604	0.0106	0.0592	0.0045	0.0396	0.0292	0.013
119	CAGL0G00902g	Nucleus	Membrane	0.9948	0.0039	0	0	0.0002	0.0004	0	0.0005	0.0001	0

## Sheet: Table S7
Table S7: DeepLoc 1.0 web server-based subcellular localization analysis of proteins identified in the Cgyps1-11Δ secretome.
Sr. no.	Entry ID	Localization	Type	Nucleus	Cytoplasm	Extracellular	Mitochondrion	Cell membrane	Endoplasmic reticulum	Plastid	Golgi apparatus	Lysosome/Vacuole	Peroxisome
Cell membrane
1	CAGL0C02211g	Cell membrane	Membrane	0.0001	0	0.0492	0.0084	0.5895	0.289	0	0.0235	0.0402	0
2	CAGL0D02530g	Cell membrane	Membrane	0.0002	0.0002	0.0789	0.0003	0.5116	0.2879	0.0002	0.0188	0.1018	0.0001
3	CAGL0D03498g	Cell membrane	Soluble	0.0325	0.1816	0.1003	0.203	0.223	0.0363	0.0046	0.1268	0.0758	0.0162
4	CAGL0E04620g	Cell membrane	Membrane	0	0	0.1867	0.001	0.3537	0.2487	0	0.0063	0.2036	0
5	CAGL0F01287g	Cell membrane	Membrane	0	0	0.149	0.0024	0.7242	0.113	0	0.0064	0.005	0
6	CAGL0F03883g	Cell membrane	Membrane	0	0	0.2603	0.0001	0.6549	0.0306	0	0.0017	0.0523	0
7	CAGL0F05115g	Cell membrane	Membrane	0.0086	0.0058	0.0181	0.0689	0.6566	0.0204	0.0039	0.0197	0.1896	0.0085
8	CAGL0J04466g	Cell membrane	Membrane	0	0	0	0.0002	0.7654	0.0424	0	0.0176	0.1743	0
9	CAGL0J11770g	Cell membrane	Membrane	0	0.0001	0.2401	0.001	0.4022	0.2018	0.0004	0.0048	0.1497	0
10	CAGL0J11748g	Cell membrane	Membrane	0	0	0.2513	0.0002	0.4168	0.2371	0.0002	0.0102	0.0843	0
11	CAGL0L01727g	Cell membrane	Membrane	0	0	0.0712	0.002	0.6117	0.1786	0.001	0.0142	0.1213	0
12	CAGL0M08206g	Cell membrane	Membrane	0.0006	0.0005	0.0078	0.0024	0.5782	0.1614	0.0013	0.0535	0.1937	0.0005
13	CAGL0M08756g	Cell membrane	Membrane	0	0	0.1505	0.0002	0.5588	0.2335	0.0001	0.0067	0.0501	0
14	CAGL0M01826g	Cell membrane	Membrane	0	0	0.0002	0.0004	0.4377	0.4347	0	0.0144	0.1125	0
15	CAGL0G09449g	Cell membrane	Membrane	0.0001	0	0.0337	0.0046	0.6059	0.3227	0	0.0254	0.0075	0
16	CAGL0M13849g	Cell membrane	Membrane	0	0	0.1003	0.0042	0.7054	0.0914	0	0.0207	0.0778	0
17	CAGL0G00286g	Cell membrane	Membrane	0	0	0.2626	0.0008	0.6158	0.06	0	0.006	0.0546	0
18	CAGL0A02409g	Cell membrane	Membrane	0.1379	0.0877	0.0331	0.0382	0.6625	0.0013	0.0039	0.0155	0.0133	0.0065
19	CAGL0A02233g	Cell membrane	Membrane	0.0002	0	0	0.0096	0.5313	0.104	0.0003	0.0848	0.2683	0.0015
20	CAGL0A02211g	Cell membrane	Membrane	0.0002	0	0	0.0088	0.5391	0.1011	0.0003	0.076	0.2731	0.0014
21	CAGL0A02321g	Cell membrane	Membrane	0.0002	0	0	0.0073	0.5511	0.064	0.0002	0.0639	0.3122	0.0012
22	CAGL0A01804g	Cell membrane	Membrane	0.0003	0	0	0.0126	0.4928	0.1345	0.0003	0.0745	0.2836	0.0013
23	CAGL0A01782g	Cell membrane	Membrane	0.0003	0	0	0.0114	0.4853	0.1585	0.0003	0.103	0.2398	0.0013
24	CAGL0B03685g	Cell membrane	Membrane	0.0095	0.1852	0.0856	0.0403	0.3373	0.0283	0.0085	0.1988	0.0662	0.0403
25	CAGL0C03267g	Cell membrane	Membrane	0.0008	0.0003	0	0.0041	0.5136	0.1638	0.0003	0.0407	0.2655	0.0109
26	CAGL0B04389g	Cell membrane	Membrane	0.0003	0	0	0.0002	0.5747	0.1301	0	0.0847	0.2097	0.0001
27	CAGL0D04708g	Cell membrane	Membrane	0.0023	0	0	0.0012	0.6471	0.1523	0	0.0381	0.1582	0.0007
28	CAGL0D02442g	Cell membrane	Membrane	0.0015	0	0	0.0094	0.6033	0.1717	0.0004	0.1013	0.1104	0.0019
29	CAGL0E04092g	Cell membrane	Membrane	0.0001	0	0	0.0017	0.3632	0.3035	0.0001	0.1875	0.1437	0.0002
30	CAGL0G06138g	Cell membrane	Membrane	0.0248	0.098	0.001	0.0006	0.7648	0.0005	0.0001	0.0915	0.0176	0.0011
31	CAGL0G02453g	Cell membrane	Membrane	0.0011	0	0	0.0073	0.393	0.317	0.0003	0.129	0.1501	0.0022
32	CAGL0F04345g	Cell membrane	Membrane	0	0	0	0.0001	0.8788	0.0222	0	0.0086	0.0902	0
33	CAGL0F02717g	Cell membrane	Membrane	0.0001	0	0	0.0017	0.5451	0.0756	0.0001	0.0605	0.3162	0.0007
34	CAGL0G01034g	Cell membrane	Membrane	0	0	0	0.0002	0.4015	0.1091	0	0.1113	0.3778	0
35	CAGL0H03399g	Cell membrane	Membrane	0.0001	0	0	0.0063	0.5332	0.1017	0.0007	0.1213	0.2362	0.0005
36	CAGL0I10494g	Cell membrane	Membrane	0.0001	0	0.0002	0.0023	0.8905	0.0365	0.0003	0.0315	0.0385	0
37	CAGL0I08459g	Cell membrane	Membrane	0	0	0	0	1	0	0	0	0	0
38	CAGL0I04862g	Cell membrane	Membrane	0.0001	0	0	0.0015	0.6042	0.0923	0.0002	0.0654	0.2357	0.0007
39	CAGL0J06028g	Cell membrane	Membrane	0.0001	0.0001	0	0.0064	0.7844	0.0187	0.0003	0.0162	0.1721	0.0018
40	CAGL0J11176g	Cell membrane	Membrane	0.0001	0	0	0.0017	0.8371	0.0458	0.0003	0.0123	0.1026	0.0001
41	CAGL0J01419g	Cell membrane	Membrane	0.2207	0.1972	0.0024	0.024	0.3318	0.0223	0.0049	0.1601	0.0364	0.0002
42	CAGL0K12034g	Cell membrane	Membrane	0	0	0	0.001	0.7304	0.0172	0	0.0117	0.2391	0.0006
43	CAGL0K04037g	Cell membrane	Membrane	0	0	0	0.0002	0.4527	0.0732	0	0.1049	0.3689	0.0001
44	CAGL0L08448g	Cell membrane	Membrane	0.0008	0	0.0002	0.0026	0.9141	0.0275	0.0004	0.0204	0.034	0.0001
45	CAGL0L01551g	Cell membrane	Membrane	0.0022	0.0006	0.0009	0.0254	0.9002	0.0236	0.0016	0.0211	0.0237	0.0008
46	CAGL0L10912g	Cell membrane	Membrane	0.0004	0	0	0.0021	0.5725	0.1554	0.0004	0.0752	0.1936	0.0004
47	CAGL0L11814g	Cell membrane	Membrane	0.0007	0.0002	0	0.0005	0.4409	0.1525	0.0001	0.1784	0.2259	0.0008
48	CAGL0M14113g	Cell membrane	Membrane	0.0044	0.0001	0.0001	0.057	0.3149	0.2312	0.0022	0.2843	0.1019	0.0039
49	CAGL0M01760g	Cell membrane	Membrane	0.0002	0.0001	0	0.0026	0.5926	0.1133	0.0003	0.0656	0.2241	0.0011
50	CAGL0G08558g	Cell membrane	Membrane	0.0005	0.0022	0	0.0001	0.9952	0.0001	0	0.0017	0.0002	0
51	CAGL0G05808g	Cell membrane	Membrane	0.0001	0	0	0.0001	0.811	0.0388	0	0.1362	0.0139	0
52	CAGL0G08954g	Cell membrane	Membrane	0.1131	0.2009	0.0276	0.0642	0.3998	0.1292	0.0015	0.0481	0.0121	0.0035
53	CAGL0I10384g	Cell membrane	Membrane	0.0001	0.0001	0	0.0026	0.4023	0.2732	0.0003	0.0681	0.2524	0.0008
54	CAGL0G00242g	Cell membrane	Membrane	0.0007	0	0	0.0048	0.5025	0.126	0.0005	0.074	0.2899	0.0016
55	CAGL0G08085g	Cell membrane	Membrane	0.0008	0.0001	0	0.0004	0.5076	0.1358	0.0001	0.1428	0.2116	0.0007
Cytoplasm
56	CAGL0A00979g	Cytoplasm	Soluble	0.1696	0.7899	0.0001	0.0376	0.0026	0	0.0001	0	0	0.0001
57	CAGL0A01540g	Cytoplasm	Soluble	0.0894	0.6441	0.004	0.2419	0.0016	0.001	0.0005	0.0001	0.0004	0.017
58	CAGL0A03278g	Cytoplasm	Soluble	0.2639	0.4274	0.0003	0.3079	0.0003	0	0	0	0	0.0003
59	CAGL0C04741g	Cytoplasm	Soluble	0.0002	0.6131	0.0049	0.0893	0.002	0.021	0.0283	0.0001	0.0023	0.2387
60	CAGL0B01100g	Cytoplasm	Soluble	0.0277	0.5673	0.0184	0.0616	0.0095	0.0113	0.0106	0.0106	0.119	0.1642
61	CAGL0D00858g	Cytoplasm	Soluble	0.205	0.5672	0.074	0.1533	0.0002	0	0	0	0	0.0003
62	CAGL0E02255g	Cytoplasm	Soluble	0.1058	0.2985	0.0015	0.1281	0.1263	0.0594	0.1116	0.0597	0.1086	0.0005
63	CAGL0E01991g	Cytoplasm	Soluble	0.2452	0.5671	0.0035	0.0409	0.005	0.0008	0.0018	0.0003	0.0002	0.1353
64	CAGL0E00869g	Cytoplasm	Soluble	0.2798	0.7188	0.0002	0.0002	0.0001	0.0003	0	0.0001	0.0003	0.0001
65	CAGL0D01188g	Cytoplasm	Soluble	0.0567	0.9147	0.0018	0.0189	0.001	0.0008	0.002	0.0001	0.0009	0.0032
66	CAGL0H08734g	Cytoplasm	Soluble	0.0002	0.9966	0.0014	0.0017	0	0	0	0	0	0.0001
67	CAGL0H04521g	Cytoplasm	Soluble	0.0488	0.951	0	0.0001	0.0001	0	0	0	0	0
68	CAGL0I07843g	Cytoplasm	Soluble	0.0014	0.5499	0.002	0.0855	0.0008	0.0008	0.0135	0	0.0007	0.3454
69	CAGL0K10906g	Cytoplasm	Soluble	0.0035	0.9946	0	0.0015	0.0001	0	0	0	0	0.0004
70	CAGL0K00803g	Cytoplasm	Soluble	0.2617	0.6257	0.0006	0.0036	0.0001	0.0003	0.1064	0	0.0017	0.0001
71	CAGL0J03234g	Cytoplasm	Soluble	0.3732	0.4813	0.0008	0.1175	0.0007	0.0016	0.0012	0.0001	0.0003	0.0233
72	CAGL0J00451g	Cytoplasm	Soluble	0.0012	0.8501	0.0003	0.0836	0	0.0001	0.0089	0	0.0006	0.0551
73	CAGL0K04125g	Cytoplasm	Soluble	0.0791	0.7788	0.0025	0.1046	0.0065	0.0037	0.0097	0.0004	0.0122	0.0024
74	CAGL0K06149g	Cytoplasm	Soluble	0.0391	0.96	0	0.0004	0.0001	0	0	0	0	0.0003
75	CAGL0K11858g	Cytoplasm	Soluble	0.0001	0.6585	0.0007	0.0101	0.0002	0.0019	0.0012	0	0.0001	0.3272
76	CAGL0K12694g	Cytoplasm	Soluble	0.0187	0.8779	0.0005	0.0031	0.0312	0.0068	0.002	0.0225	0.0184	0.0189
77	CAGL0L07722g	Cytoplasm	Soluble	0.0012	0.8448	0.0014	0.0804	0.0008	0.0011	0.005	0	0.0012	0.0641
78	CAGL0K10384g	Cytoplasm	Soluble	0.1366	0.5761	0.0006	0.0005	0.0539	0.0023	0.0003	0.1001	0.1276	0.002
79	CAGL0M10241g	Cytoplasm	Soluble	0.0956	0.7534	0.0336	0.0603	0.0344	0.0053	0.0009	0.0014	0.0076	0.0075
80	CAGL0M07161g	Cytoplasm	Soluble	0.4784	0.5091	0.0001	0.0006	0.0006	0.0009	0.0001	0.0021	0.0065	0.0016
81	CAGL0M11704g	Cytoplasm	Soluble	0.0067	0.9153	0.0014	0.008	0.0001	0.0008	0.0338	0	0.0002	0.0337
82	CAGL0G09383g	Cytoplasm	Soluble	0.0012	0.8461	0.0003	0.0881	0	0.0001	0.0092	0	0.0006	0.0544
83	CAGL0M12034g	Cytoplasm	Soluble	0.004	0.9598	0.0006	0.0142	0.0001	0.0003	0.0041	0	0.0009	0.016
84	CAGL0G03289g	Cytoplasm	Soluble	0.0077	0.8747	0.0005	0.0177	0.004	0.0082	0.0311	0.0063	0.0127	0.0372
85	CAGL0G08360g	Cytoplasm	Soluble	0.0981	0.8586	0.0007	0.002	0.0029	0.0127	0.0004	0.0097	0.0101	0.0048
86	CAGL0G09713g	Cytoplasm	Soluble	0.0257	0.8772	0.0008	0.0961	0	0	0	0	0	0
87	CAGL0G02475g	Cytoplasm	Soluble	0.2041	0.7922	0.0004	0.0026	0.0004	0	0	0	0	0.0001
88	CAGL0G08173g	Cytoplasm	Soluble	0.4032	0.5954	0.0011	0.0001	0.0001	0	0	0	0	0
89	CAGL0I02486g	Cytoplasm	Soluble	0.0133	0.9176	0.0009	0.031	0.0005	0.0002	0.0046	0	0.0011	0.0309
90	CAGL0B02755g	Cytoplasm	Soluble	0.2424	0.2939	0.1723	0.2071	0.0176	0.0072	0.0228	0.0035	0.0322	0.0012
91	CAGL0A03168g	Cytoplasm	Soluble	0.0036	0.985	0.0002	0.0029	0.0005	0.001	0.0004	0.0003	0.0008	0.0054
92	CAGL0A02002g	Cytoplasm	Soluble	0.3242	0.6487	0.0013	0.0038	0.003	0.0008	0.001	0.0028	0.0128	0.0017
93	CAGL0A01562g	Cytoplasm	Soluble	0.0948	0.8116	0	0.0928	0	0	0.0001	0	0	0.0007
94	CAGL0A04521g	Cytoplasm	Soluble	0.0821	0.9007	0.0001	0.0119	0.0001	0	0	0	0	0.0051
95	CAGL0A02530g	Cytoplasm	Soluble	0.0003	0.8248	0.0006	0.0486	0.0002	0.0007	0.0104	0	0.0007	0.1137
96	CAGL0B04257g	Cytoplasm	Soluble	0.2382	0.7508	0.0001	0.0048	0.0001	0	0.0001	0	0	0.0059
97	CAGL0A04829g	Cytoplasm	Soluble	0.0132	0.9332	0.0008	0.008	0.0032	0.0003	0.0129	0.0004	0.0016	0.0264
98	CAGL0A02112g	Cytoplasm	Soluble	0.0094	0.9576	0.0002	0.0025	0.0013	0.0033	0.0045	0.0011	0.0079	0.0122
99	CAGL0A03366g	Cytoplasm	Soluble	0.0023	0.4594	0.0156	0.1427	0.0013	0.0033	0.0054	0.0001	0.0012	0.3687
100	CAGL0A02090g	Cytoplasm	Soluble	0.0517	0.7768	0.0138	0.0835	0.001	0.0073	0.0514	0.0003	0.0056	0.0086
101	CAGL0A00363g	Cytoplasm	Soluble	0.0041	0.5666	0.0012	0.0151	0.0006	0.0022	0.004	0.0002	0.0009	0.4053
102	CAGL0A03058g	Cytoplasm	Soluble	0.0315	0.7158	0.0001	0.0005	0.1193	0.0013	0.0004	0.0586	0.0684	0.004
103	CAGL0A03234g	Cytoplasm	Soluble	0.0333	0.9247	0.0014	0.0021	0.0051	0.0061	0.0004	0.0021	0.0064	0.0184
104	CAGL0B03399g	Cytoplasm	Soluble	0.2885	0.6761	0	0.0001	0.0042	0.0013	0.0001	0.0172	0.0084	0.004
105	CAGL0B01203g	Cytoplasm	Soluble	0.2307	0.6877	0.0314	0.0487	0.0012	0.0001	0.0001	0.0001	0	0
106	CAGL0C02849g	Cytoplasm	Soluble	0.3417	0.5831	0.0001	0.0379	0.0034	0.0035	0.0001	0.0036	0.0254	0.0012
107	CAGL0B01419g	Cytoplasm	Soluble	0.0064	0.4521	0.0025	0.3859	0.0067	0.0006	0.0271	0.0001	0.0007	0.1179
108	CAGL0C03465g	Cytoplasm	Soluble	0.0869	0.7756	0.0079	0.0057	0.0696	0.0026	0.0003	0.0278	0.0217	0.0019
109	CAGL0C00275g	Cytoplasm	Soluble	0.0007	0.9662	0.0008	0.0104	0.0002	0.0006	0.0145	0	0.0003	0.0064
110	CAGL0B04785g	Cytoplasm	Soluble	0.3446	0.6539	0.0001	0.0001	0.0004	0.0001	0.0001	0.0001	0.0002	0.0004
111	CAGL0C05511g	Cytoplasm	Soluble	0.0097	0.9633	0.0011	0.0026	0.0014	0.0014	0.0009	0.0005	0.004	0.0152
112	CAGL0B03069g	Cytoplasm	Soluble	0.3691	0.5084	0.0027	0.0243	0.0273	0.0151	0.0044	0.0036	0.0186	0.0264
113	CAGL0C04983g	Cytoplasm	Soluble	0.0014	0.9203	0.0004	0.0017	0.0004	0.0034	0.0032	0.0001	0.0006	0.0686
114	CAGL0C01573g	Cytoplasm	Soluble	0.013	0.8579	0.0012	0.0176	0.0007	0.0019	0.0039	0.0001	0.0019	0.1018
115	CAGL0B01122g	Cytoplasm	Soluble	0.0192	0.8635	0.0018	0.0302	0.0003	0.0009	0.031	0.0001	0.007	0.0459
116	CAGL0C05115g	Cytoplasm	Soluble	0.0036	0.9421	0.0006	0.0067	0.0009	0.0014	0.0017	0.0001	0.0015	0.0414
117	CAGL0C03443g	Cytoplasm	Soluble	0.0014	0.6646	0.0059	0.0919	0.0027	0.0068	0.0038	0.0005	0.0034	0.219
118	CAGL0C02189g	Cytoplasm	Soluble	0.002	0.9337	0.001	0.0118	0.0001	0.0002	0.0022	0	0.0005	0.0486
119	CAGL0B03619g	Cytoplasm	Soluble	0.0083	0.4534	0.0152	0.1287	0.0038	0.0115	0.0932	0.0171	0.0554	0.2135
120	CAGL0B02794g	Cytoplasm	Soluble	0.011	0.838	0.0016	0.0082	0.0012	0.0033	0.0024	0.0004	0.003	0.131
121	CAGL0B03839g	Cytoplasm	Soluble	0.0038	0.9211	0.0021	0.0181	0.0011	0.0026	0.0038	0.0002	0.0026	0.0447
122	CAGL0C05379g	Cytoplasm	Soluble	0.006	0.9309	0.0002	0.0105	0.0005	0.0014	0.0072	0.0004	0.0047	0.0382
123	CAGL0C00671g	Cytoplasm	Soluble	0.1186	0.7463	0.0009	0.0014	0.0915	0.0014	0.0004	0.0343	0.0035	0.0017
124	CAGL0B03487g	Cytoplasm	Soluble	0.1666	0.7811	0.0006	0.0021	0.005	0.0093	0.0004	0.0123	0.0115	0.011
125	CAGL0C01265g	Cytoplasm	Soluble	0.4051	0.422	0	0.0001	0.0064	0.0021	0.0001	0.1029	0.0592	0.0022
126	CAGL0D00616g	Cytoplasm	Soluble	0.0053	0.9863	0.0002	0.0058	0.0001	0	0.0002	0	0.0001	0.0021
127	CAGL0E04048g	Cytoplasm	Soluble	0.25	0.5188	0.0006	0.0265	0.0112	0.0073	0.0003	0.0068	0.1734	0.0051
128	CAGL0D01452g	Cytoplasm	Soluble	0.0347	0.7828	0.0007	0.0003	0.0066	0.0188	0.0006	0.0082	0.1473	0.0001
129	CAGL0E01177g	Cytoplasm	Soluble	0.0261	0.625	0.0306	0.2606	0.0017	0.0037	0.0333	0.0006	0.0047	0.0137
130	CAGL0E02013g	Cytoplasm	Soluble	0.0015	0.9936	0.0001	0.0017	0	0	0.0001	0	0	0.003
131	CAGL0D03058g	Cytoplasm	Soluble	0.0166	0.5225	0.0789	0.2257	0.0121	0.0087	0.0218	0.002	0.0142	0.0976
132	CAGL0E06358g	Cytoplasm	Soluble	0.0647	0.584	0.0025	0.3335	0.0001	0.0001	0.0102	0	0.0001	0.0047
133	CAGL0E03938g	Cytoplasm	Soluble	0.0078	0.9766	0.0007	0.0096	0.0001	0	0	0	0	0.0052
134	CAGL0D04290g	Cytoplasm	Soluble	0.0187	0.5488	0.161	0.0169	0.0784	0.0168	0.0171	0.0429	0.0263	0.073
135	CAGL0E05170g	Cytoplasm	Soluble	0.0011	0.6503	0.0032	0.0073	0.0008	0.0009	0.0025	0.0001	0.0007	0.333
136	CAGL0E01133g	Cytoplasm	Soluble	0.0008	0.6283	0.0012	0.2607	0.0005	0.0005	0.0463	0.0002	0.0004	0.0612
137	CAGL0D01034g	Cytoplasm	Soluble	0.011	0.691	0.0003	0.2616	0.0005	0.0001	0.0322	0	0.0001	0.0032
138	CAGL0D01892g	Cytoplasm	Soluble	0.0098	0.7996	0.0015	0.026	0.0004	0.0006	0.0082	0.0001	0.0032	0.1507
139	CAGL0D06402g	Cytoplasm	Soluble	0.0115	0.6685	0.0114	0.1017	0.0035	0.0058	0.0238	0.0002	0.0021	0.1716
140	CAGL0D00176g	Cytoplasm	Soluble	0.0068	0.5445	0.0024	0.1472	0.0012	0.0028	0.0211	0.0002	0.0031	0.2707
141	CAGL0E05610g	Cytoplasm	Soluble	0.0037	0.9403	0.0008	0.0318	0.0002	0.0003	0.0084	0	0.001	0.0136
142	CAGL0D05280g	Cytoplasm	Soluble	0.0121	0.3691	0.0057	0.0783	0.0018	0.0134	0.2436	0.0067	0.0216	0.2477
143	CAGL0D06622g	Cytoplasm	Soluble	0.0401	0.7152	0.0001	0.0001	0.0305	0.0021	0	0.1474	0.0642	0.0003
144	CAGL0E02783g	Cytoplasm	Soluble	0.291	0.7037	0.0001	0.0001	0.0027	0.0002	0	0.001	0.0009	0.0004
145	CAGL0D06446g	Cytoplasm	Soluble	0.1366	0.6345	0.0011	0.0068	0.0101	0.0099	0.0016	0.1076	0.0568	0.035
146	CAGL0G05940g	Cytoplasm	Soluble	0.0012	0.9268	0.0716	0.0003	0	0	0	0	0	0
147	CAGL0G07529g	Cytoplasm	Soluble	0.0409	0.952	0.0005	0.0005	0.0009	0.0013	0.0001	0.0008	0.002	0.0009
148	CAGL0G01078g	Cytoplasm	Soluble	0.0599	0.8271	0	0.1122	0	0	0	0	0	0.0007
149	CAGL0J09372g	Cytoplasm	Soluble	0.3383	0.5729	0.0018	0.0196	0.0014	0.0046	0.0163	0.0008	0.0266	0.0178
150	CAGL0G07227g	Cytoplasm	Soluble	0.1423	0.6029	0.0027	0.2173	0.0059	0.0008	0.0053	0.0005	0.0011	0.0212
151	CAGL0F08547g	Cytoplasm	Soluble	0.1758	0.8195	0	0.0005	0.0001	0.0006	0.0001	0.0003	0.0029	0.0002
152	CAGL0H05643g	Cytoplasm	Soluble	0.0613	0.9269	0.0007	0.0101	0.0001	0	0	0	0	0.0008
153	CAGL0G09130g	Cytoplasm	Soluble	0.1097	0.8833	0.0001	0.0018	0.0004	0.0006	0.0001	0	0.0002	0.0039
154	CAGL0J00561g	Cytoplasm	Soluble	0.0025	0.4852	0.0074	0.1529	0.0034	0.0042	0.0224	0.0001	0.0029	0.319
155	CAGL0F00407g	Cytoplasm	Soluble	0.1134	0.6419	0.0041	0.0032	0.009	0.1101	0.0007	0.0532	0.034	0.0304
156	CAGL0E04906g	Cytoplasm	Soluble	0.0508	0.8907	0.0016	0.0009	0.0027	0.0116	0.0005	0.0044	0.0037	0.0332
157	CAGL0H05445g	Cytoplasm	Soluble	0.0025	0.6568	0.0037	0.0087	0.0018	0.005	0.0079	0.0008	0.0095	0.3033
158	CAGL0F03531g	Cytoplasm	Soluble	0.1582	0.4555	0.0246	0.0245	0.0924	0.006	0.0016	0.1309	0.0793	0.027
159	CAGL0G03795g	Cytoplasm	Soluble	0.0065	0.8764	0.0005	0.0167	0.0036	0.0072	0.0366	0.0065	0.011	0.035
160	CAGL0G06886g	Cytoplasm	Soluble	0.1867	0.6373	0.0002	0.0036	0.0373	0.0018	0.0013	0.0605	0.0435	0.0278
161	CAGL0J09350g	Cytoplasm	Soluble	0.1565	0.7033	0.001	0.0042	0.0037	0.0046	0.0009	0.0033	0.0097	0.1128
162	CAGL0F03091g	Cytoplasm	Soluble	0.0312	0.9233	0.0012	0.036	0.0002	0.0017	0.0047	0	0.0003	0.0014
163	CAGL0H09658g	Cytoplasm	Soluble	0.0571	0.5385	0.0831	0.0897	0.038	0.018	0.0208	0.0089	0.0946	0.0514
164	CAGL0F07491g	Cytoplasm	Soluble	0.0646	0.7131	0.0025	0.0041	0.0058	0.0234	0.0078	0.0045	0.1741	0.0002
165	CAGL0F01045g	Cytoplasm	Soluble	0.2217	0.6629	0.0001	0.0195	0.0001	0.0005	0.0002	0	0	0.095
166	CAGL0H10032g	Cytoplasm	Soluble	0.0001	0.6432	0.0007	0.011	0.0002	0.0023	0.0012	0	0.0002	0.3411
167	CAGL0F02563g	Cytoplasm	Soluble	0.0119	0.3669	0.0132	0.0344	0.0224	0.2415	0.0064	0.0096	0.0589	0.2348
168	CAGL0H08327g	Cytoplasm	Soluble	0.0008	0.6808	0.0005	0.2442	0.0002	0.0006	0.0049	0	0.0003	0.0677
169	CAGL0H02497g	Cytoplasm	Soluble	0.3443	0.6181	0.001	0.0017	0.0013	0.0041	0.0068	0.0051	0.017	0.0007
170	CAGL0H09878g	Cytoplasm	Soluble	0.0318	0.7174	0.0075	0.0976	0.0045	0.0046	0.0803	0.0022	0.0109	0.0432
171	CAGL0F04257g	Cytoplasm	Soluble	0.2025	0.747	0.0024	0.0156	0.0146	0.0004	0.0002	0.003	0.0015	0.0128
172	CAGL0H03795g	Cytoplasm	Soluble	0.0015	0.9348	0.0002	0.0098	0.0001	0.0002	0.0018	0	0.0003	0.0513
173	CAGL0H06369g	Cytoplasm	Soluble	0.0068	0.7168	0.0036	0.0344	0.0007	0.0011	0.0053	0.0001	0.001	0.2301
174	CAGL0F08261g	Cytoplasm	Soluble	0.0145	0.9288	0.0008	0.0232	0.0004	0.0002	0.0032	0	0.0011	0.0278
175	CAGL0F01749g	Cytoplasm	Soluble	0.0044	0.7916	0.0008	0.0393	0.0011	0.0004	0.0019	0.0001	0.0015	0.1589
176	CAGL0F01397g	Cytoplasm	Soluble	0.1261	0.5194	0.0003	0.0072	0.2478	0.0019	0	0.0674	0.0286	0.0013
177	CAGL0I03234g	Cytoplasm	Soluble	0.4571	0.5405	0.0001	0.0011	0.0004	0.0001	0.0002	0.0001	0.0003	0.0001
178	CAGL0I01078g	Cytoplasm	Soluble	0.0623	0.8521	0.0767	0.0008	0.0008	0.0012	0.0004	0.0003	0.0042	0.0012
179	CAGL0J07238g	Cytoplasm	Soluble	0.2172	0.7545	0.0006	0.0126	0.0011	0.0019	0.0088	0.0003	0.0025	0.0004
180	CAGL0I00792g	Cytoplasm	Soluble	0.0014	0.783	0.0015	0.1743	0.0006	0.0002	0.0007	0	0.0001	0.0382
181	CAGL0I01430g	Cytoplasm	Soluble	0.028	0.9683	0.0001	0.0001	0.0002	0.0006	0	0	0.0027	0
182	CAGL0I00594g	Cytoplasm	Soluble	0.4718	0.5243	0.0002	0.001	0.0002	0.0006	0.0002	0.0003	0.0014	0.0002
183	CAGL0H09064g	Cytoplasm	Soluble	0.0012	0.9494	0.0001	0.0136	0.0001	0.0001	0.0009	0	0.0002	0.0343
184	CAGL0H00462g	Cytoplasm	Soluble	0.1989	0.743	0.0004	0.0143	0.0009	0.005	0.0124	0.0009	0.0071	0.017
185	CAGL0H03641g	Cytoplasm	Soluble	0.3295	0.6416	0.0013	0.0035	0.0012	0.0048	0.0021	0.0023	0.0136	0.0003
186	CAGL0I02200g	Cytoplasm	Soluble	0.0068	0.9123	0.0019	0.0173	0.0036	0.002	0.0156	0.0001	0.0025	0.0379
187	CAGL0J11220g	Cytoplasm	Soluble	0.0099	0.5427	0.0027	0.304	0.0151	0.0067	0.0083	0.0006	0.0011	0.109
188	CAGL0I04444g	Cytoplasm	Soluble	0.028	0.7838	0.0009	0.0285	0.0002	0.0004	0.1415	0.0001	0.0029	0.0136
189	CAGL0I01100g	Cytoplasm	Soluble	0.0135	0.8264	0.0011	0.0092	0.0003	0.0003	0.1112	0	0.0005	0.0374
190	CAGL0I01166g	Cytoplasm	Soluble	0.0002	0.8076	0.0001	0.0071	0.0001	0.0008	0.0036	0	0.0008	0.1796
191	CAGL0J07436g	Cytoplasm	Soluble	0.2109	0.6159	0.0028	0.0257	0.0268	0.0652	0.0119	0.0093	0.0182	0.0133
192	CAGL0I05236g	Cytoplasm	Soluble	0.025	0.9112	0.0017	0.0011	0.0164	0.0135	0.0006	0.0034	0.0174	0.0096
193	CAGL0I04994g	Cytoplasm	Soluble	0.0137	0.7172	0.0019	0.091	0.0006	0.001	0.0368	0.0002	0.0012	0.1364
194	CAGL0K06061g	Cytoplasm	Soluble	0.053	0.6445	0.0073	0.2731	0.0019	0.0007	0.0039	0.0001	0.0005	0.0151
195	CAGL0K08382g	Cytoplasm	Soluble	0.0875	0.5745	0.0868	0.2372	0.0007	0.0014	0.0046	0.0028	0.0025	0.0021
196	CAGL0J04202g	Cytoplasm	Soluble	0.1958	0.4428	0.0338	0.1317	0.0197	0.0523	0.0345	0.0265	0.0463	0.0166
197	CAGL0J06374g	Cytoplasm	Soluble	0.0405	0.7946	0.0165	0.0081	0.0076	0.0908	0.0111	0.0031	0.0188	0.009
198	CAGL0J00165g	Cytoplasm	Soluble	0.3574	0.5909	0.0003	0.0408	0.0015	0.0003	0	0.0001	0.0001	0.0087
199	CAGL0J07678g	Cytoplasm	Soluble	0.3033	0.6926	0.0002	0.0023	0.0002	0	0.0003	0	0.001	0.0002
200	CAGL0K05731g	Cytoplasm	Soluble	0.4718	0.5241	0.0003	0.0008	0.0007	0.0008	0	0.0001	0.0008	0.0006
201	CAGL0K02123g	Cytoplasm	Soluble	0.0053	0.9943	0	0.0003	0	0	0	0	0	0
202	CAGL0J10384g	Cytoplasm	Soluble	0.0846	0.8423	0.0002	0.0477	0.0001	0.0001	0.0001	0	0	0.0248
203	CAGL0J10164g	Cytoplasm	Soluble	0.0016	0.9568	0	0.0069	0	0	0.0001	0	0	0.0345
204	CAGL0J09152g	Cytoplasm	Soluble	0.0508	0.9447	0.0004	0.0001	0.0005	0.0009	0.0001	0.0002	0.0011	0.0012
205	CAGL0J05038g	Cytoplasm	Soluble	0.0017	0.8583	0.002	0.0447	0.0009	0.0022	0.0147	0.0002	0.0006	0.0748
206	CAGL0J01331g	Cytoplasm	Soluble	0.0003	0.8655	0.0007	0.0094	0.0004	0.0004	0.0007	0	0.0003	0.1223
207	CAGL0J02354g	Cytoplasm	Soluble	0.0006	0.9526	0.0001	0.0164	0	0	0.0001	0	0	0.0302
208	CAGL0J02398g	Cytoplasm	Soluble	0.0077	0.7984	0.011	0.1153	0.0002	0.0003	0.0609	0	0.0008	0.0054
209	CAGL0K03289g	Cytoplasm	Soluble	0.0193	0.7955	0.0149	0.0424	0.0062	0.0043	0.017	0.0014	0.0097	0.0893
210	CAGL0J02244g	Cytoplasm	Soluble	0.0072	0.895	0.0017	0.0084	0.0006	0.0017	0.0006	0.0001	0.0014	0.0832
211	CAGL0J06402g	Cytoplasm	Soluble	0.0014	0.836	0.0002	0.001	0.0003	0.0002	0.0002	0	0.0005	0.1602
212	CAGL0J03780g	Cytoplasm	Soluble	0.1483	0.8177	0.0016	0.0018	0.0084	0.0043	0.0007	0.0047	0.0106	0.0019
213	CAGL0J08349g	Cytoplasm	Soluble	0.0598	0.8967	0.0004	0.0035	0.0307	0.0007	0.0013	0.0022	0.0007	0.0039
214	CAGL0K09724g	Cytoplasm	Soluble	0.0244	0.7529	0.0036	0.0158	0.0048	0.0036	0.176	0.0033	0.0119	0.0038
215	CAGL0K03135g	Cytoplasm	Soluble	0.1182	0.8609	0.0004	0.0175	0.0006	0.0003	0.0008	0	0.0004	0.0008
216	CAGL0K06567g	Cytoplasm	Soluble	0.0006	0.9783	0.001	0.0193	0	0	0	0	0	0.0007
217	CAGL0K00671g	Cytoplasm	Soluble	0.1645	0.4145	0.0073	0.3653	0.0013	0.0024	0.0041	0.0002	0.0007	0.0396
218	CAGL0K11748g	Cytoplasm	Soluble	0.0008	0.9911	0	0.0068	0	0	0.0001	0	0	0.0011
219	CAGL0K07414g	Cytoplasm	Soluble	0.0016	0.9965	0.0001	0.0012	0.0001	0	0	0	0	0.0005
220	CAGL0K06281g	Cytoplasm	Soluble	0.0331	0.6419	0.0026	0.2741	0.0011	0.0007	0.0337	0.0003	0.0036	0.009
221	CAGL0K11660g	Cytoplasm	Soluble	0.3846	0.5637	0.0016	0.0235	0.001	0.0075	0.0015	0.0004	0.0028	0.0134
222	CAGL0K06259g	Cytoplasm	Soluble	0.0333	0.7436	0.0169	0.0455	0.0061	0.0568	0.0768	0.0034	0.0134	0.0042
223	CAGL0K12826g	Cytoplasm	Soluble	0.0159	0.9005	0	0.0813	0	0	0.0001	0	0	0.0022
224	CAGL0K11418g	Cytoplasm	Soluble	0.0082	0.5296	0.0056	0.3787	0.0004	0.0005	0.0659	0.0001	0.0004	0.0106
225	CAGL0K12848g	Cytoplasm	Soluble	0.0643	0.8655	0.001	0.001	0.0014	0.0055	0.0003	0.0015	0.0499	0.0097
226	CAGL0L00759g	Cytoplasm	Soluble	0.0233	0.6553	0.0056	0.1502	0.0111	0.0122	0.0139	0.0028	0.0094	0.1162
227	CAGL0K04235g	Cytoplasm	Soluble	0.0268	0.9199	0.003	0.0091	0.0012	0.0029	0.0029	0.0004	0.0047	0.0292
228	CAGL0L02497g	Cytoplasm	Soluble	0.0032	0.8638	0.0048	0.0333	0.0036	0.0055	0.0212	0.0006	0.0057	0.0583
229	CAGL0K08536g	Cytoplasm	Soluble	0.0379	0.424	0.0182	0.067	0.0423	0.0191	0.0946	0.0132	0.1156	0.1682
230	CAGL0K06699g	Cytoplasm	Soluble	0.1202	0.8231	0.0003	0.0003	0.0024	0.0009	0.0007	0.0279	0.0201	0.0041
231	CAGL0K09922g	Cytoplasm	Soluble	0.2481	0.7302	0	0.0001	0.008	0.0003	0	0.0059	0.0071	0.0004
232	CAGL0K12012g	Cytoplasm	Soluble	0.0297	0.9039	0.0002	0.006	0.0026	0.0053	0.0041	0.0012	0.0229	0.0242
233	CAGL0K02255g	Cytoplasm	Soluble	0.0525	0.9397	0.0004	0.0004	0.0024	0.0004	0.0001	0.0006	0.0011	0.0024
234	CAGL0K05709g	Cytoplasm	Soluble	0.2503	0.7295	0.0001	0.0003	0.0064	0.0003	0.0011	0.0034	0.0047	0.0038
235	CAGL0K03487g	Cytoplasm	Soluble	0.0103	0.9858	0.0002	0.0001	0.0016	0	0	0.0001	0.0002	0.0018
236	CAGL0K07590g	Cytoplasm	Soluble	0.0153	0.982	0.0001	0.0001	0.001	0	0	0	0.0002	0.0012
237	CAGL0K08294g	Cytoplasm	Soluble	0.031	0.9245	0.0023	0.0018	0.0045	0.0032	0.0005	0.0044	0.008	0.0198
238	CAGL0M05665g	Cytoplasm	Soluble	0.0124	0.6946	0.0998	0.0831	0.0074	0.0181	0.0465	0.0031	0.0343	0.0007
239	CAGL0L06248g	Cytoplasm	Soluble	0.2406	0.5528	0.1181	0.03	0.0044	0.0081	0.0081	0.0019	0.0356	0.0004
240	CAGL0L09581g	Cytoplasm	Soluble	0.0171	0.6467	0.0013	0.1893	0.0007	0.0011	0.0079	0	0.0029	0.1331
241	CAGL0L04840g	Cytoplasm	Soluble	0.0006	0.9822	0.0004	0.0158	0	0	0	0	0	0.0009
242	CAGL0L10978g	Cytoplasm	Soluble	0.4282	0.5586	0.0016	0.0046	0.0011	0.0013	0.0029	0.0004	0.001	0.0003
243	CAGL0L12540g	Cytoplasm	Soluble	0.4528	0.4889	0.0028	0.0533	0.0001	0.0008	0.0001	0	0.0003	0.0008
244	CAGL0L12870g	Cytoplasm	Soluble	0.045	0.9382	0.0005	0.0018	0.0008	0.0036	0.001	0.0003	0.0088	0.0001
245	CAGL0L11462g	Cytoplasm	Soluble	0.1087	0.8832	0.0001	0.0023	0.0029	0	0	0	0.0001	0.0026
246	CAGL0L06886g	Cytoplasm	Soluble	0.0061	0.9867	0	0.0041	0	0	0	0	0	0.003
247	CAGL0L01067g	Cytoplasm	Soluble	0.4291	0.4909	0.0292	0.0032	0.0134	0.0044	0.0004	0.0161	0.0085	0.0049
248	CAGL0L02321g	Cytoplasm	Soluble	0.0071	0.7873	0.0019	0.029	0.0088	0.008	0.01	0.0016	0.069	0.0773
249	CAGL0L05478g	Cytoplasm	Soluble	0.0151	0.8451	0.0028	0.0997	0.0001	0.0004	0.0235	0	0.001	0.0122
250	CAGL0M12430g	Cytoplasm	Soluble	0.0018	0.9396	0.001	0.0032	0.0002	0.0008	0.0009	0	0.0008	0.0516
251	CAGL0L06270g	Cytoplasm	Soluble	0.2194	0.7477	0.0004	0.0009	0.002	0.0131	0.0002	0.0061	0.0096	0.0006
252	CAGL0L12056g	Cytoplasm	Soluble	0.1886	0.7832	0.0003	0.0008	0.0014	0.0134	0.0002	0.0031	0.0081	0.0009
253	CAGL0L06974g	Cytoplasm	Soluble	0.0022	0.5285	0.0066	0.0288	0.0013	0.0053	0.0295	0.0001	0.0022	0.3956
254	CAGL0L13222g	Cytoplasm	Soluble	0.2305	0.7673	0	0	0.0011	0.0001	0.0001	0.0003	0.0003	0.0003
255	CAGL0L09933g	Cytoplasm	Soluble	0.0852	0.9065	0.0002	0.0001	0.0034	0.0004	0	0.0026	0.0014	0.0002
256	CAGL0L06028g	Cytoplasm	Soluble	0.3993	0.4367	0.0005	0.0037	0.0481	0.0076	0.0004	0.0695	0.0259	0.0083
257	CAGL0L02299g	Cytoplasm	Soluble	0.0307	0.8709	0.0007	0.0098	0.0012	0.0012	0.0019	0.0012	0.0052	0.0771
258	CAGL0L00495g	Cytoplasm	Soluble	0.1241	0.8451	0.0003	0.0011	0.0011	0.0182	0.0016	0.0011	0.0063	0.0011
259	CAGL0L12694g	Cytoplasm	Soluble	0.1113	0.722	0.0031	0.013	0.0044	0.0671	0.0041	0.0238	0.0425	0.0087
260	CAGL0L12914g	Cytoplasm	Soluble	0.1845	0.6323	0.0008	0.0048	0.0095	0.0048	0.0046	0.1384	0.0186	0.0016
261	CAGL0M11000g	Cytoplasm	Soluble	0.1441	0.8063	0.006	0.0233	0.0015	0.0019	0.0065	0.0003	0.0099	0.0002
262	CAGL0M04873g	Cytoplasm	Soluble	0.2005	0.5635	0.0024	0.2243	0.0004	0.0005	0.0002	0.0001	0.0001	0.0082
263	CAGL0M12408g	Cytoplasm	Soluble	0.2069	0.5409	0.0001	0.2517	0.0003	0	0	0	0	0.0001
264	CAGL0M03861g	Cytoplasm	Soluble	0.1518	0.8385	0.0001	0.009	0	0	0.0001	0	0	0.0005
265	CAGL0M13277g	Cytoplasm	Soluble	0.0099	0.6963	0.0029	0.1504	0.002	0.0026	0.1183	0.0001	0.005	0.0126
266	CAGL0M06523g	Cytoplasm	Soluble	0.0006	0.9983	0	0.0007	0	0	0	0	0	0.0003
267	CAGL0M08118g	Cytoplasm	Soluble	0.0806	0.8599	0.0005	0.0571	0.0002	0	0.0002	0	0	0.0015
268	CAGL0M01562g	Cytoplasm	Soluble	0.0026	0.6731	0.0025	0.0363	0.0025	0.0292	0.1479	0.0002	0.0063	0.0993
269	CAGL0M14003g	Cytoplasm	Soluble	0.302	0.58	0.0024	0.0212	0.005	0.0041	0.0037	0.0091	0.0315	0.0411
270	CAGL0M11660g	Cytoplasm	Soluble	0.003	0.9394	0.0025	0.0087	0.0003	0.0012	0.002	0	0.0012	0.0417
271	CAGL0M00814g	Cytoplasm	Soluble	0.0798	0.9117	0.0004	0.002	0.0015	0.0007	0.0001	0.0005	0.0014	0.002
272	CAGL0M05995g	Cytoplasm	Soluble	0.1386	0.6281	0.0068	0.0339	0.0023	0.0105	0.1377	0.004	0.0148	0.0234
273	CAGL0M00330g	Cytoplasm	Soluble	0.0007	0.4055	0.0023	0.2203	0.0006	0.0011	0.0058	0.0002	0.0008	0.3627
274	CAGL0M12837g	Cytoplasm	Soluble	0.0093	0.6205	0.0003	0.0547	0.0002	0.0002	0.2136	0.0003	0.0034	0.0975
275	CAGL0M13343g	Cytoplasm	Soluble	0.0004	0.7606	0.0008	0.0346	0.0006	0.0032	0.0111	0.0002	0.0015	0.187
276	CAGL0M05357g	Cytoplasm	Soluble	0.0082	0.9666	0.0006	0.0009	0.0125	0.0009	0.0004	0.0021	0.004	0.0038
277	CAGL0M07920g	Cytoplasm	Soluble	0.0024	0.7343	0.001	0.0108	0.0012	0.0048	0.0024	0.0003	0.0016	0.2414
278	CAGL0M03729g	Cytoplasm	Soluble	0.1161	0.879	0.0001	0.0001	0.002	0.0001	0.0001	0.0004	0.001	0.0011
279	CAGL0M02497g	Cytoplasm	Soluble	0.0148	0.5805	0.0005	0.3997	0.0036	0	0	0	0	0.001
280	CAGL0G06094g	Cytoplasm	Soluble	0.1573	0.8375	0.0003	0.0007	0.0016	0.0008	0	0.0008	0.0009	0.0002
281	CAGL0G06490g	Cytoplasm	Soluble	0.2933	0.6655	0.0001	0.0382	0.0011	0.0002	0.0003	0.0004	0.0003	0.0007
282	CAGL0G07271g	Cytoplasm	Soluble	0.0328	0.7451	0.0195	0.0466	0.0062	0.0461	0.0823	0.0029	0.014	0.0045
283	CAGL0G00396g	Cytoplasm	Soluble	0.2951	0.3739	0.0148	0.2438	0.0092	0.0077	0.0074	0.0074	0.0195	0.0211
284	CAGL0G09933g	Cytoplasm	Soluble	0.2456	0.7204	0.0067	0.0102	0.0043	0.0007	0.0012	0.0017	0.0074	0.002
285	CAGL0G04961g	Cytoplasm	Soluble	0.0748	0.9136	0.0003	0.0036	0.0001	0.0009	0.0003	0.0005	0.0055	0.0003
286	CAGL0F01683g	Cytoplasm	Soluble	0.0732	0.9203	0.0002	0.003	0.0004	0.0006	0.0003	0	0.0002	0.0017
287	CAGL0G05049g	Cytoplasm	Soluble	0.303	0.4806	0.0008	0.0068	0.0109	0.0053	0.0003	0.0093	0.1657	0.0173
288	CAGL0F02937g	Cytoplasm	Soluble	0.0049	0.9756	0.0007	0.0059	0.0001	0.0001	0.0003	0	0.0004	0.0119
289	CAGL0F06127g	Cytoplasm	Soluble	0.1244	0.7389	0.0082	0.0197	0.0103	0.0067	0.0349	0.0054	0.0344	0.0171
290	CAGL0G07106g	Cytoplasm	Soluble	0.0071	0.7932	0.0009	0.0241	0.0019	0.0055	0.0051	0.0012	0.0082	0.1528
291	CAGL0H05511g	Cytoplasm	Soluble	0.1589	0.8384	0	0.0012	0.0001	0	0	0	0	0.0014
292	CAGL0H07007g	Cytoplasm	Soluble	0.393	0.5173	0.0025	0.0287	0.0027	0.0077	0.0106	0.0045	0.0235	0.0093
293	CAGL0F09031g	Cytoplasm	Soluble	0.0857	0.9007	0.0001	0.0118	0.0001	0	0	0	0	0.0015
294	CAGL0G00990g	Cytoplasm	Soluble	0.0233	0.9339	0.0003	0.0058	0.0018	0.0052	0.0004	0.0008	0.0029	0.0257
295	CAGL0H07579g	Cytoplasm	Soluble	0.0119	0.9411	0.0012	0.007	0.0051	0.0005	0.0057	0.0003	0.0024	0.0248
296	CAGL0H05137g	Cytoplasm	Soluble	0.0031	0.5587	0.0027	0.0407	0.0003	0.0012	0.1534	0.0004	0.0034	0.236
297	CAGL0G00660g	Cytoplasm	Soluble	0.048	0.8105	0.0003	0.0001	0.1122	0.0006	0	0.0173	0.0105	0.0004
298	CAGL0I10648g	Cytoplasm	Soluble	0.0515	0.6483	0.0495	0.1015	0.0117	0.0067	0.0337	0.0079	0.0367	0.0526
299	CAGL0G05401g	Cytoplasm	Soluble	0.0934	0.8943	0.0001	0.0001	0.0042	0.0001	0	0.0043	0.0028	0.0008
Endoplasmic reticulum
300	CAGL0A00495g	Endoplasmic reticulum	Membrane	0.0001	0	0	0.0012	0.1917	0.5412	0.0001	0.1307	0.1348	0.0002
301	CAGL0D02948g	Endoplasmic reticulum	Soluble	0.0003	0.0117	0.0236	0.0097	0.0006	0.945	0.0028	0.0003	0.0054	0.0005
302	CAGL0F06413g	Endoplasmic reticulum	Membrane	0.0001	0.0002	0.1202	0.0014	0.2995	0.3504	0.0003	0.0112	0.2165	0.0002
303	CAGL0H01529g	Endoplasmic reticulum	Soluble	0	0.0291	0.2906	0.0058	0.0003	0.5911	0.0026	0	0.0804	0.0001
304	CAGL0G07887g	Endoplasmic reticulum	Membrane	0.0094	0.0014	0.0011	0.0269	0.0263	0.7481	0.0007	0.0617	0.1202	0.0043
305	CAGL0A01001g	Endoplasmic reticulum	Membrane	0.009	0.0093	0.0022	0.0987	0.18	0.3114	0.0117	0.045	0.081	0.2516
306	CAGL0B00704g	Endoplasmic reticulum	Soluble	0.0003	0.0024	0.0029	0.0029	0.0001	0.9901	0.0001	0.0002	0.001	0.0001
307	CAGL0A01243g	Endoplasmic reticulum	Membrane	0.0007	0	0	0.0331	0.0942	0.4818	0.0014	0.2653	0.1221	0.0014
308	CAGL0B03773g	Endoplasmic reticulum	Membrane	0.0004	0	0	0.006	0.1915	0.5363	0.0004	0.1161	0.1479	0.0015
309	CAGL0A01199g	Endoplasmic reticulum	Membrane	0.0011	0.0001	0	0.0139	0.324	0.4158	0.0026	0.1435	0.0963	0.0027
310	CAGL0B01012g	Endoplasmic reticulum	Membrane	0.0009	0.0001	0	0.0083	0.21	0.5001	0.0006	0.1499	0.1276	0.0025
311	CAGL0B02585g	Endoplasmic reticulum	Membrane	0	0	0	0.0004	0.0022	0.9858	0	0.0098	0.0017	0
312	CAGL0D03212g	Endoplasmic reticulum	Membrane	0.1067	0.0068	0.0001	0.0107	0.0174	0.6001	0.0068	0.0571	0.0133	0.181
313	CAGL0C00319g	Endoplasmic reticulum	Membrane	0.0004	0.0005	0.0056	0.0033	0.0132	0.6567	0.0022	0.2129	0.1044	0.0007
314	CAGL0B03949g	Endoplasmic reticulum	Membrane	0.0017	0	0	0.001	0.2032	0.6322	0.0001	0.0673	0.0942	0.0003
315	CAGL0E05940g	Endoplasmic reticulum	Membrane	0.0001	0.0002	0	0.0006	0.1492	0.683	0.0002	0.0894	0.0773	0.0001
316	CAGL0F03267g	Endoplasmic reticulum	Membrane	0.0024	0	0	0.0002	0.0885	0.7558	0	0.0788	0.0742	0.0001
317	CAGL0H01705g	Endoplasmic reticulum	Soluble	0.0001	0.0846	0.2736	0.0222	0.0002	0.3683	0.0081	0	0.2411	0.0018
318	CAGL0F03553g	Endoplasmic reticulum	Membrane	0.0167	0.0959	0.0051	0.0503	0.0039	0.6569	0.0373	0.0787	0.0282	0.0271
319	CAGL0F08371g	Endoplasmic reticulum	Membrane	0.0005	0	0	0.0025	0.0558	0.5589	0.0001	0.3477	0.034	0.0004
320	CAGL0I01232g	Endoplasmic reticulum	Membrane	0	0	0	0.0001	0.0039	0.9443	0	0.0514	0.0004	0
321	CAGL0I07447g	Endoplasmic reticulum	Membrane	0.0003	0	0	0.0141	0.2614	0.3328	0.0004	0.1311	0.259	0.0008
322	CAGL0J08162g	Endoplasmic reticulum	Membrane	0.0007	0	0	0.0081	0.244	0.5328	0.0007	0.1161	0.096	0.0017
323	CAGL0J08184g	Endoplasmic reticulum	Membrane	0.0009	0	0	0.0116	0.2664	0.504	0.0013	0.1364	0.0769	0.0023
324	CAGL0J11506g	Endoplasmic reticulum	Membrane	0.0002	0	0	0.0005	0.2281	0.329	0	0.1537	0.2884	0.0001
325	CAGL0K04609g	Endoplasmic reticulum	Membrane	0.0007	0	0	0.0038	0.3122	0.4159	0.0002	0.2152	0.0511	0.001
326	CAGL0K05753g	Endoplasmic reticulum	Membrane	0.0023	0.0002	0.0001	0.0282	0.217	0.3708	0.0042	0.1983	0.1744	0.0044
327	CAGL0K07293g	Endoplasmic reticulum	Membrane	0.007	0.0962	0.0398	0.05	0.1091	0.3333	0.0643	0.0332	0.0417	0.2254
328	CAGL0M11104g	Endoplasmic reticulum	Membrane	0	0	0	0.0099	0.0061	0.7922	0	0.18	0.0115	0.0002
329	CAGL0L03267g	Endoplasmic reticulum	Membrane	0.0008	0	0	0.0096	0.2112	0.5177	0.0008	0.1582	0.0988	0.0028
330	CAGL0L07546g	Endoplasmic reticulum	Membrane	0.0008	0.0001	0	0.0077	0.2206	0.5136	0.0005	0.142	0.1131	0.0017
331	CAGL0M12320g	Endoplasmic reticulum	Membrane	0.0045	0.006	0.0006	0.0129	0.1728	0.5975	0.004	0.0872	0.1108	0.0036
332	CAGL0G03663g	Endoplasmic reticulum	Membrane	0.0003	0	0	0.0009	0.0263	0.9118	0	0.0279	0.0314	0.0013
333	CAGL0I00704g	Endoplasmic reticulum	Membrane	0.0006	0.0001	0.0002	0.0039	0.0031	0.9745	0.0005	0.0062	0.0107	0.0002
Extracellular
334	CAGL0A01474g	Extracellular	Soluble	0	0.0028	0.8335	0.0011	0.0162	0.0669	0.0006	0.0017	0.0772	0
335	CAGL0A01870g	Extracellular	Soluble	0	0	0.8074	0	0.03	0.0438	0.0007	0.0011	0.117	0
336	CAGL0C00363g	Extracellular	Soluble	0	0.0001	0.9884	0	0.0001	0.01	0	0	0.0013	0
337	CAGL0E02915g	Extracellular	Soluble	0.0012	0.0308	0.8275	0.0201	0.0146	0.0545	0.0019	0.0029	0.0462	0.0003
338	CAGL0F01463g	Extracellular	Soluble	0	0	0.4121	0.003	0.212	0.3062	0.0001	0.0004	0.0662	0
339	CAGL0I06160g	Extracellular	Soluble	0.0001	0.0022	0.9885	0	0.0031	0.0042	0	0.0002	0.0017	0
340	CAGL0G07667g	Extracellular	Soluble	0	0	0.9999	0	0	0	0	0	0.0001	0
341	CAGL0G00220g	Extracellular	Soluble	0	0	0.9961	0	0	0.0021	0	0	0.0017	0
342	CAGL0G09515g	Extracellular	Soluble	0	0	0.9982	0	0	0.0003	0.0009	0	0.0006	0
343	CAGL0F07579g	Extracellular	Soluble	0.0014	0.0114	0.9784	0.0001	0.0029	0.0032	0	0.0001	0.0026	0
344	CAGL0F07601g	Extracellular	Soluble	0.0007	0.0121	0.8611	0.0005	0.0324	0.0419	0	0.0039	0.0473	0.0001
345	CAGL0I06182g	Extracellular	Soluble	0.0013	0.0144	0.9398	0.001	0.0113	0.0152	0.0001	0.0078	0.0086	0.0003
346	CAGL0J01463g	Extracellular	Soluble	0	0.0024	0.5496	0.0056	0.185	0.1621	0.0002	0.0063	0.0886	0.0002
347	CAGL0J06050g	Extracellular	Soluble	0	0.0009	0.9735	0	0.0004	0.0078	0	0	0.0173	0
348	CAGL0J09922g	Extracellular	Soluble	0	0	1	0	0	0	0	0	0	0
349	CAGL0K07546g	Extracellular	Soluble	0	0.001	0.8194	0.0001	0.0002	0.1542	0	0	0.0252	0
350	CAGL0L05434g	Extracellular	Soluble	0	0	0.9998	0	0	0	0	0	0.0002	0
351	CAGL0L03289g	Extracellular	Soluble	0	0	0.9999	0	0	0	0	0	0.0001	0
352	CAGL0M08514g	Extracellular	Soluble	0.0002	0.007	0.9791	0.0001	0.0031	0.0025	0	0.0003	0.0077	0
353	CAGL0M08492g	Extracellular	Soluble	0	0.0001	0.9987	0	0	0.0009	0	0	0.0003	0
354	CAGL0M05599g	Extracellular	Soluble	0	0	0.9753	0	0.0002	0.0185	0	0	0.006	0
355	CAGL0M09779g	Extracellular	Soluble	0	0	0.9979	0	0	0.0021	0	0	0	0
356	CAGL0M03597g	Extracellular	Soluble	0.003	0.0107	0.7151	0.0005	0.027	0.0846	0.0001	0.0213	0.1376	0
357	CAGL0M13805g	Extracellular	Soluble	0	0	0.9767	0	0.0001	0.0037	0	0	0.0194	0
358	CAGL0G08668g	Extracellular	Soluble	0	0	0.9999	0	0	0.0001	0	0	0	0
359	CAGL0G00308g	Extracellular	Soluble	0	0	0.9909	0	0	0.0039	0	0	0.0052	0
360	CAGL0I00484g	Extracellular	Soluble	0	0	0.9998	0	0	0.0002	0	0	0	0
361	CAGL0A02299g	Extracellular	Soluble	0	0.0009	0.6886	0.0001	0.0131	0.014	0	0.0443	0.239	0
362	CAGL0C04939g	Extracellular	Soluble	0	0.0001	0.815	0	0.0181	0.0168	0	0.0027	0.1474	0
363	CAGL0C01133g	Extracellular	Soluble	0.0002	0.0172	0.6806	0.0001	0.2286	0.0392	0	0.0052	0.0289	0
364	CAGL0E06644g	Extracellular	Soluble	0.0014	0.0359	0.5576	0.0003	0.2272	0.0817	0.0001	0.0149	0.0807	0.0001
365	CAGL0F05137g	Extracellular	Soluble	0	0	0.9997	0	0	0.0002	0	0	0.0001	0
366	CAGL0H08844g	Extracellular	Soluble	0.1463	0.2015	0.4499	0.0832	0.0285	0.0144	0.001	0.0157	0.059	0.0004
367	CAGL0K07524g	Extracellular	Soluble	0	0.0015	0.8649	0.0006	0.0001	0.1184	0.0001	0	0.0143	0
368	CAGL0J06820g	Extracellular	Soluble	0	0.0002	0.9464	0.0003	0.0207	0.0158	0.0001	0.0118	0.0047	0
369	CAGL0K03459g	Extracellular	Soluble	0.095	0.1164	0.4298	0.1918	0.0172	0.0206	0.0347	0.0103	0.0828	0.0015
370	CAGL0M08734g	Extracellular	Soluble	0.0012	0.0229	0.863	0.0201	0.0052	0.0523	0.0069	0.0035	0.0247	0.0002
371	CAGL0M11572g	Extracellular	Soluble	0.0001	0.0043	0.9462	0.005	0.0001	0.0012	0.0005	0	0.0427	0
372	CAGL0G06006g	Extracellular	Soluble	0	0.0013	0.8707	0.0006	0.0001	0.1078	0.0002	0	0.0194	0
373	CAGL0G07623g	Extracellular	Soluble	0	0.002	0.7861	0.0441	0.0009	0.0059	0.1303	0.0002	0.0304	0
374	CAGL0I00220g	Extracellular	Soluble	0.001	0.0608	0.4892	0.0003	0.2363	0.0696	0.0009	0.0098	0.1314	0.0006
Golgi apparatus
375	CAGL0C02453g	Golgi apparatus	Membrane	0.0007	0.001	0.0004	0.0018	0.036	0.0197	0.0002	0.7603	0.1795	0.0003
376	CAGL0F04807g	Golgi apparatus	Membrane	0.0844	0.2154	0.0002	0.132	0.0634	0.0499	0.0061	0.3108	0.1368	0.0011
377	CAGL0I10516g	Golgi apparatus	Soluble	0.2028	0.3242	0	0.0001	0.0004	0.0038	0	0.4665	0.002	0.0001
378	CAGL0F02123g	Golgi apparatus	Membrane	0.0006	0.0021	0.0003	0.0011	0.0494	0.0112	0	0.8177	0.1174	0.0002
379	CAGL0H07403g	Golgi apparatus	Membrane	0.0041	0.0038	0.0002	0.0016	0.0097	0.407	0.0001	0.4088	0.1646	0.0002
380	CAGL0I03916g	Golgi apparatus	Membrane	0.0146	0.028	0.0012	0.0862	0.0081	0.0732	0.0023	0.7389	0.0298	0.0179
381	CAGL0M02167g	Golgi apparatus	Membrane	0.0027	0.0007	0.0001	0.0019	0.0041	0.3236	0.0002	0.4973	0.1689	0.0006
382	CAGL0F04873g	Golgi apparatus	Membrane	0.0002	0.0001	0	0.0007	0.1154	0.1938	0.0001	0.5789	0.1106	0.0003
Lysosome/Vacuole
383	CAGL0F08833g	Lysosome/Vacuole	Membrane	0	0	0.0354	0.0004	0.2816	0.28	0.0024	0.052	0.3479	0.0001
384	CAGL0K01353g	Lysosome/Vacuole	Soluble	0	0.0001	0.3587	0.0001	0.0012	0.0106	0.0067	0	0.6225	0
385	CAGL0K05137g	Lysosome/Vacuole	Membrane	0.0004	0.0039	0.0549	0.0198	0.2453	0.2067	0.0403	0.0282	0.3966	0.0039
386	CAGL0A00187g	Lysosome/Vacuole	Membrane	0.1688	0.195	0.0001	0.0003	0.0639	0.0029	0	0.1461	0.4224	0.0003
387	CAGL0E05346g	Lysosome/Vacuole	Membrane	0.0679	0.1477	0.006	0.0028	0.0582	0.0116	0.0005	0.0362	0.6686	0.0005
388	CAGL0E06160g	Lysosome/Vacuole	Membrane	0.0046	0.0003	0	0.0018	0.148	0.2688	0.0005	0.2761	0.2966	0.0034
389	CAGL0G04807g	Lysosome/Vacuole	Membrane	0.0031	0.0009	0.0001	0.0036	0.0897	0.1838	0.0013	0.2721	0.417	0.0283
390	CAGL0F08987g	Lysosome/Vacuole	Soluble	0.3168	0.2444	0.001	0.0024	0.0183	0.0195	0.0001	0.0541	0.3433	0.0001
391	CAGL0H10076g	Lysosome/Vacuole	Membrane	0	0	0	0.0132	0.1937	0.2614	0.0031	0.2092	0.3191	0.0002
392	CAGL0I06743g	Lysosome/Vacuole	Membrane	0.0004	0.0001	0	0.05	0.278	0.2238	0.0032	0.1296	0.3134	0.0015
393	CAGL0H02255g	Lysosome/Vacuole	Membrane	0.0003	0	0	0.0028	0.2484	0.0752	0.0001	0.1709	0.5014	0.0009
394	CAGL0J00495g	Lysosome/Vacuole	Membrane	0.0003	0.0001	0	0.0038	0.0804	0.0624	0.0008	0.0576	0.7919	0.0027
395	CAGL0L02563g	Lysosome/Vacuole	Membrane	0.0184	0.0043	0.0352	0.0103	0.0634	0.0404	0.0787	0.2458	0.5032	0.0003
396	CAGL0L12342g	Lysosome/Vacuole	Membrane	0.0004	0.0002	0	0.0066	0.268	0.0458	0.0006	0.0816	0.5946	0.0023
397	CAGL0M02211g	Lysosome/Vacuole	Soluble	0	0.0015	0.0551	0.0003	0.0051	0.0113	0.0001	0.0002	0.926	0.0006
398	CAGL0G06358g	Lysosome/Vacuole	Membrane	0.0039	0.0001	0.0002	0.0009	0.059	0.054	0.0001	0.3751	0.5066	0.0001
399	CAGL0G06622g	Lysosome/Vacuole	Membrane	0.0002	0	0	0.0005	0.1528	0.2622	0.0001	0.1551	0.4289	0.0002
Mitochondrion
400	CAGL0A03542g	Mitochondrion	Soluble	0.0334	0.0031	0.0406	0.9154	0.0014	0.0003	0.0047	0.0004	0.0006	0
401	CAGL0I01408g	Mitochondrion	Soluble	0.0073	0.2917	0.0687	0.5846	0.0006	0.0003	0.0273	0	0.0002	0.0191
402	CAGL0I09394g	Mitochondrion	Soluble	0	0.0002	0.0001	0.9994	0.0001	0	0.0001	0	0	0.0001
403	CAGL0G03575g	Mitochondrion	Soluble	0.0149	0.0595	0.0224	0.8447	0.0141	0.0011	0.0097	0.0009	0.0006	0.032
404	CAGL0H06127g	Mitochondrion	Membrane	0.0001	0.0001	0.0003	0.9992	0	0	0.0001	0	0.0001	0
405	CAGL0A01111g	Mitochondrion	Membrane	0.0011	0.0013	0.0044	0.9811	0.0021	0.0013	0.0069	0.0002	0.0004	0.0012
406	CAGL0A03146g	Mitochondrion	Membrane	0.0086	0.0562	0.063	0.6251	0.0125	0.0787	0.0118	0.0956	0.0282	0.0204
407	CAGL0A04697g	Mitochondrion	Soluble	0.0091	0.0108	0.0007	0.971	0.0004	0.0001	0.0021	0.0007	0.0021	0.0029
408	CAGL0B03047g	Mitochondrion	Soluble	0	0.0003	0	0.9988	0	0	0.0004	0	0	0.0005
409	CAGL0C04455g	Mitochondrion	Soluble	0	0.0008	0.0002	0.9918	0.0004	0	0.0005	0	0	0.0063
410	CAGL0C05137g	Mitochondrion	Soluble	0	0.0003	0	0.8902	0	0	0.1081	0	0	0.0014
411	CAGL0B02431g	Mitochondrion	Membrane	0	0	0	0.8866	0	0.0003	0.1127	0	0	0.0003
412	CAGL0B03993g	Mitochondrion	Soluble	0.0016	0.1024	0.0005	0.7578	0.0003	0.0001	0.0228	0	0.0004	0.1142
413	CAGL0D06424g	Mitochondrion	Soluble	0	0.0008	0	0.997	0	0	0.0003	0	0	0.0019
414	CAGL0D02046g	Mitochondrion	Membrane	0.011	0.0078	0.0012	0.9786	0.0005	0.0001	0.0004	0.0001	0.0002	0.0001
415	CAGL0E00583g	Mitochondrion	Soluble	0	0.001	0.0002	0.9596	0	0	0.0387	0	0	0.0004
416	CAGL0E05896g	Mitochondrion	Membrane	0.0063	0.1341	0.015	0.2652	0.0174	0.2608	0.099	0.0497	0.0982	0.0542
417	CAGL0D00770g	Mitochondrion	Soluble	0.0005	0.0047	0.0014	0.9873	0.0004	0.0002	0.0026	0.0001	0.0002	0.0027
418	CAGL0H04191g	Mitochondrion	Membrane	0.001	0.003	0.019	0.9276	0.0098	0.0287	0.001	0.0013	0.0026	0.006
419	CAGL0G04653g	Mitochondrion	Membrane	0.0133	0.0089	0.0655	0.7785	0.1114	0.0068	0.0003	0.0115	0.003	0.0007
420	CAGL0G10153g	Mitochondrion	Membrane	0.0004	0.0011	0.0008	0.8804	0.0005	0.0015	0.0012	0.0001	0.0001	0.1139
421	CAGL0G07931g	Mitochondrion	Soluble	0.0001	0.0002	0	0.9823	0	0	0.0174	0	0	0
422	CAGL0G02277g	Mitochondrion	Soluble	0.0024	0.0012	0	0.9954	0	0	0.0005	0	0	0.0004
423	CAGL0J05126g	Mitochondrion	Soluble	0.0082	0.1639	0.0022	0.5194	0.0014	0.0005	0.105	0.0002	0.0006	0.1987
424	CAGL0I03322g	Mitochondrion	Soluble	0	0.0004	0.0006	0.9984	0.0003	0	0.0002	0	0	0.0002
425	CAGL0H04691g	Mitochondrion	Membrane	0.0003	0.0004	0.0011	0.9972	0.0004	0.0002	0	0.0001	0	0.0001
426	CAGL0F06693g	Mitochondrion	Membrane	0.0001	0.0001	0.0002	0.9995	0	0	0.0001	0	0	0
427	CAGL0H04565g	Mitochondrion	Soluble	0.0159	0.0131	0	0.9561	0	0	0.0007	0	0.0001	0.0141
428	CAGL0H01397g	Mitochondrion	Soluble	0	0.0001	0.0001	0.9994	0.0001	0	0.0001	0	0	0.0002
429	CAGL0F04213g	Mitochondrion	Membrane	0	0.0001	0	0.7362	0.0087	0.2137	0.0134	0.0012	0.0045	0.0222
430	CAGL0F06501g	Mitochondrion	Soluble	0.0025	0.0369	0.0007	0.6798	0.0001	0.0001	0.2629	0.0001	0.0003	0.0167
431	CAGL0H05665g	Mitochondrion	Soluble	0.0016	0.1181	0.0005	0.7194	0.0021	0.0018	0.0164	0.0001	0.0013	0.1387
432	CAGL0H00506g	Mitochondrion	Soluble	0	0.0002	0	0.9923	0	0	0.0073	0	0	0.0002
433	CAGL0F08481g	Mitochondrion	Membrane	0.0559	0.1322	0.0234	0.2646	0.0241	0.0391	0.1727	0.0208	0.0187	0.2484
434	CAGL0I04686g	Mitochondrion	Soluble	0	0.0001	0.0001	0.9995	0	0	0.0001	0	0	0.0001
435	CAGL0I07139g	Mitochondrion	Soluble	0.0001	0.0046	0.0001	0.9888	0	0	0.0004	0	0	0.006
436	CAGL0I08965g	Mitochondrion	Membrane	0.0344	0.0913	0.0036	0.4055	0.0575	0.1021	0.0342	0.0369	0.1078	0.1267
437	CAGL0J06380g	Mitochondrion	Soluble	0.0005	0.0014	0.0014	0.9964	0.0001	0	0	0	0	0.0001
438	CAGL0K04587g	Mitochondrion	Soluble	0.023	0.2293	0.0042	0.6838	0.0005	0.0004	0.0339	0	0.0008	0.0241
439	CAGL0J11682g	Mitochondrion	Soluble	0.1554	0.0317	0.0513	0.7201	0.0004	0.0001	0.0006	0.0001	0.0001	0.0402
440	CAGL0J09856g	Mitochondrion	Soluble	0.0373	0.0226	0.0005	0.9171	0.0004	0.0001	0.0056	0	0	0.0165
441	CAGL0J02442g	Mitochondrion	Soluble	0	0.0004	0.0004	0.9985	0	0	0.0005	0	0	0.0001
442	CAGL0K04719g	Mitochondrion	Membrane	0.007	0.0157	0.0709	0.6363	0.0575	0.036	0.0311	0.0021	0.0997	0.0437
443	CAGL0L06160g	Mitochondrion	Soluble	0	0.0003	0.0003	0.9988	0	0	0.0004	0	0	0.0001
444	CAGL0K05973g	Mitochondrion	Soluble	0	0.0009	0	0.9976	0	0	0.0003	0	0	0.0011
445	CAGL0L08110g	Mitochondrion	Soluble	0.2485	0.2474	0.0001	0.5039	0.0001	0	0	0	0	0.0001
446	CAGL0M07986g	Mitochondrion	Soluble	0.0006	0.002	0.0012	0.9952	0	0	0.0008	0	0	0
447	CAGL0M10329g	Mitochondrion	Soluble	0.0014	0.0015	0.0918	0.8817	0.0027	0.0064	0.0101	0.001	0.003	0.0002
448	CAGL0L08734g	Mitochondrion	Soluble	0.0336	0.057	0.0002	0.9066	0	0	0.0001	0	0	0.0024
449	CAGL0L05236g	Mitochondrion	Soluble	0	0.0006	0	0.9978	0.0001	0	0.0004	0	0	0.0011
450	CAGL0L09229g	Mitochondrion	Soluble	0	0.0008	0	0.9975	0	0	0.0003	0	0	0.0012
451	CAGL0M00418g	Mitochondrion	Membrane	0.0002	0.0001	0.0012	0.9981	0.0002	0	0	0.0001	0.0001	0
452	CAGL0M04675g	Mitochondrion	Soluble	0.0005	0.0209	0.0281	0.9369	0.0021	0.0033	0.0033	0.0003	0.001	0.0036
453	CAGL0M10637g	Mitochondrion	Soluble	0.0033	0.0023	0.0006	0.9863	0.0002	0.0001	0.0012	0.0001	0.0054	0.0004
454	CAGL0M12386g	Mitochondrion	Soluble	0	0.0032	0.0009	0.9949	0.0001	0	0.0004	0	0	0.0004
455	CAGL0M11242g	Mitochondrion	Soluble	0.011	0.0831	0.0058	0.6678	0.01	0.0021	0.0417	0.0007	0.0041	0.1737
456	CAGL0M09581g	Mitochondrion	Soluble	0	0.0001	0	0.9997	0	0	0.0001	0	0	0
457	CAGL0G07953g	Mitochondrion	Soluble	0.0002	0.0004	0.0003	0.999	0	0	0	0	0	0
458	CAGL0G01881g	Mitochondrion	Membrane	0.0007	0.001	0.0002	0.9973	0.0004	0	0.0001	0	0	0.0002
459	CAGL0I02706g	Mitochondrion	Soluble	0.0087	0.289	0.0011	0.6994	0.0002	0	0.0002	0	0	0.0014
460	CAGL0H08283g	Mitochondrion	Soluble	0.0382	0.0741	0.0018	0.6049	0.0006	0.0004	0.2755	0.0005	0.0014	0.0026
461	CAGL0G05610g	Mitochondrion	Soluble	0.0343	0.0461	0.0113	0.8544	0.0009	0.0001	0.0507	0.0001	0.0002	0.0018
462	CAGL0G05027g	Mitochondrion	Soluble	0.3712	0.1947	0.0046	0.4026	0.0173	0.0003	0.0003	0.0063	0.0008	0.002
463	CAGL0G04675g	Mitochondrion	Soluble	0.1666	0.0887	0.0052	0.704	0.0042	0.001	0.0129	0.009	0.0041	0.0044
464	CAGL0G10131g	Mitochondrion	Membrane	0.002	0.0188	0.0069	0.7534	0.0029	0.002	0.176	0.0008	0.0024	0.0347
465	CAGL0I01496g	Mitochondrion	Soluble	0	0.0003	0.0003	0.9989	0.0003	0	0.0002	0	0	0.0001
Nucleus
466	CAGL0A03117g	Nucleus	Soluble	0.9991	0.0009	0	0	0	0	0	0	0	0
467	CAGL0C04389g	Nucleus	Soluble	0.912	0.0872	0	0.0002	0.0001	0.0001	0	0	0	0.0005
468	CAGL0C04411g	Nucleus	Soluble	0.808	0.1448	0.0032	0.041	0.0015	0	0.0001	0.0002	0.0001	0.001
469	CAGL0C02475g	Nucleus	Soluble	1	0	0	0	0	0	0	0	0	0
470	CAGL0D05214g	Nucleus	Soluble	0.6428	0.3	0.0002	0.0568	0.0001	0	0	0	0	0.0001
471	CAGL0H08541g	Nucleus	Soluble	0.638	0.3366	0.0001	0.0249	0.0001	0.0001	0	0	0	0.0001
472	CAGL0J09086g	Nucleus	Soluble	0.721	0.2259	0	0.0512	0.0002	0.0005	0	0	0	0.0012
473	CAGL0M04983g	Nucleus	Soluble	0.9336	0.033	0.0101	0.0172	0.0033	0.0018	0.0002	0.0008	0.0001	0
474	CAGL0M04543g	Nucleus	Soluble	0.4575	0.3245	0.0015	0.0604	0.0106	0.0592	0.0045	0.0396	0.0292	0.013
475	CAGL0G00902g	Nucleus	Membrane	0.9948	0.0039	0	0	0.0002	0.0004	0	0.0005	0.0001	0
476	CAGL0A01193g	Nucleus	Soluble	0.7324	0.0417	0.0023	0.2126	0.0023	0.0001	0.0084	0	0	0.0001
477	CAGL0B03179g	Nucleus	Soluble	0.562	0.4123	0.0012	0.0116	0.0065	0.0007	0.0007	0.0014	0.0017	0.0019
478	CAGL0C04136g	Nucleus	Soluble	0.913	0.0857	0	0.0009	0.0001	0	0	0	0	0.0002
479	CAGL0C00341g	Nucleus	Soluble	0.6006	0.386	0.0015	0.0028	0.0017	0.0005	0.0006	0.0017	0.004	0.0006
480	CAGL0C04301g	Nucleus	Soluble	0.5141	0.47	0.0008	0.002	0.002	0.0049	0.0003	0.0019	0.0031	0.0009
481	CAGL0C02277g	Nucleus	Soluble	0.8367	0.1631	0	0	0.0001	0	0	0	0	0
482	CAGL0E02315g	Nucleus	Soluble	0.7677	0.188	0.0145	0.0259	0.0029	0	0	0.0001	0.0001	0.0007
483	CAGL0E02167g	Nucleus	Soluble	0.4316	0.4022	0.0026	0.0903	0.0018	0.0014	0.0349	0.0014	0.027	0.0068
484	CAGL0E00737g	Nucleus	Soluble	0.9939	0.0048	0	0.0007	0	0.0002	0	0	0	0.0003
485	CAGL0D02090g	Nucleus	Soluble	0.6625	0.28	0.0047	0.0011	0.014	0.029	0.0001	0.002	0.0064	0.0001
486	CAGL0D01474g	Nucleus	Soluble	0.811	0.12	0.0569	0.0109	0.0006	0.0002	0.0001	0.0001	0	0.0003
487	CAGL0I01914g	Nucleus	Soluble	0.6149	0.3316	0.0055	0.0074	0.0022	0.0006	0.0333	0.0008	0.0033	0.0004
488	CAGL0F02255g	Nucleus	Soluble	0.8669	0.0114	0.0018	0.0002	0.1197	0	0	0	0	0
489	CAGL0J04620g	Nucleus	Soluble	0.4954	0.4314	0.01	0.0411	0.0041	0.0068	0.0035	0.0012	0.0053	0.0013
490	CAGL0I04356g	Nucleus	Soluble	0.5661	0.4286	0.0001	0.0013	0.0002	0.0014	0.0002	0.0005	0.0009	0.0006
491	CAGL0H03069g	Nucleus	Membrane	0.8443	0.0668	0	0.0001	0.0008	0.0018	0.0001	0.0214	0.064	0.0008
492	CAGL0F08745g	Nucleus	Soluble	0.6204	0.2033	0.0039	0.1645	0.0005	0.0002	0.0021	0.0001	0.0008	0.0041
493	CAGL0H02101g	Nucleus	Soluble	0.6002	0.3002	0.0032	0.0034	0.0018	0.0055	0.0026	0.001	0.0818	0.0002
494	CAGL0H07381g	Nucleus	Soluble	0.9028	0.035	0.0004	0.0553	0.0006	0.0003	0.0008	0.0006	0.0012	0.0029
495	CAGL0F02299g	Nucleus	Soluble	0.9993	0.0006	0	0.0001	0	0	0	0	0	0
496	CAGL0F01199g	Nucleus	Soluble	0.4954	0.4274	0.0023	0.0233	0.0029	0.0065	0.007	0.0098	0.0189	0.0064
497	CAGL0F04697g	Nucleus	Soluble	0.5523	0.3857	0.0009	0.0021	0.0276	0.0086	0.0005	0.0158	0.0063	0.0002
498	CAGL0H04323g	Nucleus	Soluble	0.7237	0.195	0.0002	0.0027	0.0072	0.0023	0.0001	0.0432	0.0244	0.0012
499	CAGL0F08063g	Nucleus	Soluble	0.9204	0.0781	0	0.0001	0.0002	0.0001	0	0.0008	0.0002	0
500	CAGL0F04323g	Nucleus	Soluble	0.6279	0.3687	0	0	0.0002	0.0001	0	0.0015	0.0013	0.0002
501	CAGL0J10802g	Nucleus	Soluble	0.7778	0.0926	0.0263	0.0965	0.0047	0.0016	0	0.0003	0.0002	0
502	CAGL0I08767g	Nucleus	Soluble	0.7242	0.0854	0.0001	0.0735	0.0531	0.0395	0.0006	0.0138	0.0061	0.0037
503	CAGL0H01749g	Nucleus	Soluble	0.4033	0.304	0.007	0.234	0.0063	0.0075	0.0095	0.0077	0.0128	0.0079
504	CAGL0I07359g	Nucleus	Soluble	0.9567	0.0432	0	0	0	0	0	0	0	0
505	CAGL0I04026g	Nucleus	Soluble	0.7635	0.2159	0.009	0.0052	0.004	0.0002	0.0002	0.0006	0.0002	0.0012
506	CAGL0H02057g	Nucleus	Soluble	0.9198	0.0015	0.0074	0.0509	0.0078	0.0044	0.006	0.0022	0	0
507	CAGL0I06006g	Nucleus	Soluble	0.9579	0.0415	0	0.0001	0.0001	0.0002	0	0.0001	0	0.0003
508	CAGL0H00957g	Nucleus	Soluble	0.7947	0.2001	0.0002	0.003	0	0.0015	0.0003	0	0.0001	0.0001
509	CAGL0I02156g	Nucleus	Soluble	0.9492	0.0505	0	0	0.0001	0	0	0.0001	0	0
510	CAGL0H02783g	Nucleus	Soluble	0.6363	0.3302	0.0028	0.0097	0.0082	0.0023	0.0021	0.0031	0.0024	0.0029
511	CAGL0J00737g	Nucleus	Soluble	0.761	0.2238	0.0093	0.0056	0.0001	0	0.0002	0	0	0
512	CAGL0J09614g	Nucleus	Soluble	0.796	0.2004	0	0.0006	0.0001	0.0011	0	0.0004	0.0012	0.0002
513	CAGL0K05555g	Nucleus	Soluble	0.9817	0.0094	0	0.0052	0.0002	0.0017	0.0003	0.0012	0.0003	0.0001
514	CAGL0K11572g	Nucleus	Soluble	0.9311	0.0678	0.0003	0.0003	0	0.0004	0	0	0	0
515	CAGL0L05786g	Nucleus	Soluble	0.9999	0.0001	0	0	0	0	0	0	0	0
516	CAGL0L07436g	Nucleus	Soluble	0.9991	0.0009	0	0	0	0	0	0	0	0
517	CAGL0M05269g	Nucleus	Soluble	0.4327	0.3074	0.0344	0.116	0.0392	0.0111	0.0098	0.0115	0.0262	0.0117
518	CAGL0L07150g	Nucleus	Soluble	0.9978	0.0021	0	0	0	0	0	0	0	0
519	CAGL0L00341g	Nucleus	Soluble	0.9994	0.0005	0	0	0	0.0001	0	0	0	0
520	CAGL0L02013g	Nucleus	Soluble	0.9883	0.0091	0.0001	0.0004	0	0	0	0.0001	0	0.002
521	CAGL0L04928g	Nucleus	Membrane	0.8203	0.0241	0.0001	0.0002	0.0228	0.0302	0	0.085	0.0171	0.0003
522	CAGL0M01474g	Nucleus	Soluble	0.851	0.1387	0.0001	0.0012	0.0009	0.0021	0.0001	0.0014	0.0033	0.0011
523	CAGL0M13629g	Nucleus	Membrane	0.3116	0.1123	0.0228	0.2371	0.1029	0.0072	0.031	0.1228	0.0331	0.0193
524	CAGL0M02783g	Nucleus	Soluble	0.8778	0.1207	0.0001	0.0007	0.0006	0	0	0	0	0.0001
525	CAGL0M13937g	Nucleus	Soluble	0.3571	0.2425	0.0044	0.0665	0.24	0.0059	0.0047	0.0489	0.027	0.003
526	CAGL0M12617g	Nucleus	Soluble	0.7787	0.0819	0.0004	0.0026	0.0098	0.0682	0.0002	0.0448	0.0131	0.0002
527	CAGL0M02937g	Nucleus	Soluble	0.8798	0.1193	0	0	0.0005	0	0	0.0002	0.0001	0
528	CAGL0G04983g	Nucleus	Soluble	0.872	0.1199	0	0.0044	0.0009	0.0001	0.0017	0.0007	0	0.0003
529	CAGL0M04631g	Nucleus	Soluble	0.9056	0.0697	0.0002	0.0243	0	0	0.0001	0	0	0.0001
530	CAGL0M00902g	Nucleus	Soluble	0.8657	0.1301	0.0018	0.0014	0.0005	0.0001	0	0.0002	0	0.0002
531	CAGL0G05544g	Nucleus	Soluble	0.5183	0.4631	0.0049	0.0036	0.0022	0.0029	0.0002	0.0008	0.0037	0.0004
532	CAGL0G07535g	Nucleus	Soluble	0.9436	0.0528	0	0.0009	0.0001	0.0014	0	0.0001	0.0001	0.001
533	CAGL0H07843g	Nucleus	Soluble	0.9975	0.0025	0	0	0	0	0	0	0	0
534	CAGL0G07249g	Nucleus	Soluble	0.9971	0.0029	0	0	0	0	0	0	0	0
535	CAGL0G04389g	Nucleus	Soluble	0.8945	0.1004	0	0.0001	0.0006	0.0003	0	0.001	0.003	0.0001
536	CAGL0F01265g	Nucleus	Soluble	0.9946	0.0054	0	0	0	0	0	0	0	0
Peroxisome
537	CAGL0E03157g	Peroxisome	Soluble	0.0017	0.4718	0.0003	0.0458	0.0002	0.0014	0.0016	0.0001	0.0025	0.4745
538	CAGL0D01298g	Peroxisome	Soluble	0.0004	0.4552	0.0015	0.0112	0.0003	0.0013	0.0027	0.0001	0.0009	0.5264
539	CAGL0E06138g	Peroxisome	Soluble	0.0053	0.4005	0.0023	0.0092	0.0018	0.0043	0.0025	0.001	0.004	0.569
540	CAGL0F06919g	Peroxisome	Soluble	0.0008	0.3144	0.0389	0.249	0.0266	0.003	0.0259	0.0004	0.0029	0.338
541	CAGL0F06897g	Peroxisome	Soluble	0.0006	0.2356	0.0053	0.0493	0.0317	0.0064	0.0058	0.0005	0.0035	0.6613
542	CAGL0I06050g	Peroxisome	Soluble	0.0011	0.487	0.0033	0.0046	0.0016	0.0033	0.001	0.0006	0.0022	0.4953
543	CAGL0I09878g	Peroxisome	Membrane	0.0055	0.1056	0.0166	0.0303	0.081	0.3182	0.0518	0.0204	0.0366	0.3339
544	CAGL0K10780g	Peroxisome	Soluble	0.0004	0.4106	0.0004	0.0123	0.0001	0.0002	0.0005	0	0.0006	0.5749
545	CAGL0K09328g	Peroxisome	Soluble	0.0033	0.4411	0.0062	0.0365	0.0021	0.0061	0.0099	0.0009	0.0031	0.4908
546	CAGL0L12364g	Peroxisome	Soluble	0.0011	0.4517	0.0009	0.0812	0.0005	0.0006	0.0078	0	0.0005	0.4557
Plastid
547	CAGL0E06226g	Plastid	Soluble	0.0025	0.0111	0.1068	0.1488	0.009	0.2113	0.4443	0.0042	0.0442	0.0178
548	CAGL0K00825g	Plastid	Soluble	0.0005	0.0212	0.0601	0.1903	0.0001	0.0003	0.7202	0	0.0001	0.0073

## Sheet: Table S8
Table S8: Enriched GO terms for biological process (BP), cellular component (CC) and molecular function (MF) categories for the wild-type secretome, as determined by the FungiFun tool.
Biological Process (BP)
GO ID	GO name	Gene ID(s)	Exact p-value	Adjusted p-value	Proteins/ category	Proteins / input
GO:0031505	Fungal-type cell wall organization	CAGL0A02431g , CAGL0C00363g , CAGL0C02211g , CAGL0C04741g , CAGL0E02255g , CAGL0E04620g , CAGL0F03003g , CAGL0F07579g , CAGL0F07601g , CAGL0G00220g , CAGL0G00286g , CAGL0G09449g , CAGL0I06160g , CAGL0J04466g , CAGL0M03597g , CAGL0M04191g , CAGL0M08492g , CAGL0M08514g , CAGL0M13849g	2.3845e-15	4.4949e-13	19 / 80	19 / 119
GO:0005975	Carbohydrate metabolic process	CAGL0E02915g , CAGL0F03883g , CAGL0G00220g , CAGL0G00286g , CAGL0G00308g , CAGL0G09515g , CAGL0I00484g , CAGL0M08756g , CAGL0M09779g , CAGL0M13805g , CAGL0M13849g	8.207e-12	1.0313e-9	11 / 29	11 / 119
GO:0006412	Translation	CAGL0A00979g , CAGL0A01540g , CAGL0A03278g , CAGL0D00858g , CAGL0E01991g , CAGL0G02475g , CAGL0G03575g , CAGL0G08173g , CAGL0G09713g , CAGL0H08734g , CAGL0J03234g , CAGL0J09086g , CAGL0K06149g , CAGL0M10241g	2.9884e-8	1.6095e-06	14 / 102	14 / 119
GO:0006508	Proteolysis	CAGL0A02431g , CAGL0E01727g , CAGL0E01771g , CAGL0E01793g , CAGL0E01837g , CAGL0E01859g , CAGL0E01881g , CAGL0M04191g	7.1799e-05	0.0019334	8 / 65	8 / 119
GO:0006037	Cell wall chitin metabolic process	CAGL0C02211g , CAGL0G09449g	0.00047094	0.0093444	2 / 2	2 / 119
GO:0071497	Cellular response to freezing	CAGL0F01463g , CAGL0K05137g	0.0013926	0.023865	2 / 3	2 / 119
Cellular Component (CC)
GO:0009277	Fungal-type cell wall	CAGL0A01474g , CAGL0C00110g , CAGL0C02211g , CAGL0D02530g , CAGL0E04620g , CAGL0F01287g , CAGL0F01463g , CAGL0F03883g , CAGL0F07579g , CAGL0F07601g , CAGL0G00220g , CAGL0G00286g , CAGL0G00308g , CAGL0G08668g , CAGL0G09383g , CAGL0G09449g , CAGL0I06160g , CAGL0I06182g , CAGL0J11748g , CAGL0K05137g , CAGL0L05434g , CAGL0M01826g , CAGL0M05599g , CAGL0M08206g , CAGL0M08492g , CAGL0M08514g , CAGL0M087…	2.6177e-34	9.8687e-32	30 / 64	30 / 119
GO:0005576	Extracellular region	CAGL0C00363g , CAGL0C04741g , CAGL0D01188g , CAGL0I00484g , CAGL0I06160g , CAGL0J11748g , CAGL0J11770g , CAGL0K01353g , CAGL0K04125g , CAGL0K05137g , CAGL0K11858g , CAGL0M09779g , CAGL0M13805g	8.1561e-10	6.1497e-8	13 / 65	13 / 119
GO:0022625	Cytosolic large ribosomal subunit	CAGL0A00979g , CAGL0A03278g , CAGL0D05214g , CAGL0G03575g , CAGL0H04521g , CAGL0H08734g , CAGL0J09086g , CAGL0K10906g , CAGL0M10241g	1.9079e-06	7.9919e-05	9 / 54	9 / 119
GO:0005621	Cellular bud scar	CAGL0L12144g , CAGL0M08492g , CAGL0M13849g	1.0093e-05	0.0003171	3 / 3	3 / 119
GO:0005886	Plasma membrane	CAGL0A00495g , CAGL0E04620g , CAGL0F03003g , CAGL0F03883g , CAGL0F05115g , CAGL0G00286g , CAGL0G09383g , CAGL0I06160g , CAGL0I07843g , CAGL0J04466g , CAGL0L07722g , CAGL0M03597g , CAGL0M08206g , CAGL0M11704g , CAGL0M13849g	4.8062e-05	0.0013938	15 / 212	15 / 119
GO:0005783	Endoplasmic reticulum	CAGL0A02431g , CAGL0E04664g , CAGL0F01287g , CAGL0F06413g , CAGL0H01529g , CAGL0I06160g , CAGL0J11748g , CAGL0J11770g , CAGL0L01727g , CAGL0L12144g , CAGL0M01826g , CAGL0M03597g , CAGL0M05049g , CAGL0M05599g , CAGL0M09779g , CAGL0M13805g	0.00023908	0.0060089	16 / 272	16 / 119
GO:0005618	Cell wall	CAGL0I06204g , CAGL0J01463g	0.0013926	0.023865	2 / 3	2 / 119
Molecular Function (MF)
GO:0005199	Structural constituent of cell wall	CAGL0F07579g , CAGL0F07601g , CAGL0I06160g , CAGL0I06182g , CAGL0I06204g , CAGL0J01463g , CAGL0M08492g , CAGL0M08514g	2.2755e-10	2.1446e-8	8 / 15	8 / 119
GO:0004190	Aspartic-type endopeptidase activity	CAGL0E01727g , CAGL0E01771g , CAGL0E01793g , CAGL0E01837g , CAGL0E01859g , CAGL0E01881g , CAGL0M04191g	1.0892e-8	6.8437e-7	7 / 15	7 / 119
GO:0003735	Structural constituent of ribosome	CAGL0A00979g , CAGL0A01540g , CAGL0A03278g , CAGL0D00858g , CAGL0D05214g , CAGL0E01991g , CAGL0G02475g , CAGL0G03575g , CAGL0G09713g , CAGL0H08734g , CAGL0J03234g , CAGL0J09086g , CAGL0K06149g , CAGL0K10906g , CAGL0M10241g	1.544e-06	7.2763e-05	15 / 160	15 / 119
GO:0042124	1,3-beta-glucanosyltransferase activity	CAGL0F01287g , CAGL0G00220g , CAGL0G00286g , CAGL0M13849g	3.1102e-06	0.00011725	4 / 6	4 / 119
GO:0004553	Hydrolase activity, hydrolyzing O-glycosyl compounds	CAGL0C02211g , CAGL0G00308g , CAGL0G09449g , CAGL0M13805g	7.1349e-06	0.00024453	4 / 7	4 / 119
GO:0004338	Glucan exo-1,3-beta-glucosidase activity	CAGL0G09515g , CAGL0M08756g	0.00047094	0.0093444	2 / 2	2 / 119
GO:0016757	Transferase activity, transferring glycosyl groups	CAGL0C02211g , CAGL0G09449g	0.00047094	0.0093444	2 / 2	2 / 119
GO:0004365	Glyceraldehyde-3-phosphate dehydrogenase (NAD+) (phosphorylating) activity	CAGL0G09383g , CAGL0J00451g	0.00047094	0.0093444	2 / 2	2 / 119
GO:0004622	Lysophospholipase activity	CAGL0J11748g , CAGL0J11770g	0.0013926	0.023865	2 / 3	2 / 119
GO:0003824	Catalytic activity	CAGL0E02915g , CAGL0F03883g , CAGL0L01727g , CAGL0M05049g	0.0022113	0.036247	4 / 26	4 / 119
GO:0005034	Osmosensor activity	CAGL0F03003g , CAGL0F08833g	0.0027455	0.043128	2 / 4	2 / 119

## Sheet: Table S9
Table S9: Enriched GO terms for biological process (BP), cellular component (CC) and molecular function (MF) categories for the Cgyps1-11Δ secretome, as determined by the FungiFun tool.
Biological Process (BP)
GO ID	GO name	Gene ID(s)	Exact p-value	Adjusted p-value	Proteins / category	Proteins / input
GO:0006412	Translation	CAGL0A00979g , CAGL0A01540g , CAGL0A03278g , CAGL0A04521g , CAGL0B01203g , CAGL0B04257g , CAGL0D00858g , CAGL0E01991g , CAGL0E02013g , CAGL0F01045g , CAGL0F02937g , CAGL0F09031g , CAGL0G02475g , CAGL0G03575g , CAGL0G05027g , CAGL0G05940g , CAGL0G06490g , CAGL0G07227g , CAGL0G07931g , CAGL0G07953g , CAGL0G08173g , CAGL0G09713g , CAGL0H00462g , CAGL0H04691g , CAGL0H05511g , CAGL0H08734g , CAGL0I007…	3.4773e-28	2.3924e-25	54 / 102	54 / 548
GO:0006096	Glycolytic process	CAGL0E05610g , CAGL0E06358g , CAGL0F08261g , CAGL0H05445g , CAGL0H07579g , CAGL0H08327g , CAGL0I02486g , CAGL0L02497g , CAGL0L07722g , CAGL0M12034g	1.7738e-7	2.7119e-05	10 / 15	10 / 548
GO:0002181	Cytoplasmic translation	CAGL0A03168g , CAGL0C05379g , CAGL0D00616g , CAGL0D05214g , CAGL0F01683g , CAGL0G00990g , CAGL0G01078g , CAGL0G04675g , CAGL0J02354g , CAGL0J06374g , CAGL0K10906g , CAGL0L11462g , CAGL0L12870g , CAGL0M02497g , CAGL0M08118g	1.4721e-06	0.00018414	15 / 38	15 / 548
GO:0006407	rRNA export from nucleus	CAGL0E01991g , CAGL0F01045g , CAGL0G07227g , CAGL0H00462g , CAGL0J11220g , CAGL0K02123g , CAGL0K06061g , CAGL0M04873g	3.3169e-06	0.00038033	8 / 12	8 / 548
GO:0005975	Carbohydrate metabolic process	CAGL0E02915g , CAGL0F03883g , CAGL0G00220g , CAGL0G00286g , CAGL0G00308g , CAGL0G09515g , CAGL0I00484g , CAGL0K03289g , CAGL0M08756g , CAGL0M09779g , CAGL0M13805g , CAGL0M13849g	9.4955e-06	0.00093327	12 / 29	12 / 548
GO:0006414	Translational elongation	CAGL0A03168g , CAGL0A03234g , CAGL0B03487g , CAGL0E00869g , CAGL0F08547g , CAGL0G00990g , CAGL0J06374g	2.2458e-05	0.0020601	7 / 11	7 / 548
GO:0003333	Amino acid transmembrane transport	CAGL0A01199g , CAGL0B01012g , CAGL0B03773g , CAGL0H03399g , CAGL0J08162g , CAGL0J08184g , CAGL0K05753g , CAGL0L03267g , CAGL0L07546g	5.8007e-05	0.0048487	9 / 20	9 / 548
GO:0006098	Pentose-phosphate shunt	CAGL0B03069g , CAGL0D01298g , CAGL0H05445g , CAGL0I02200g , CAGL0K04235g , CAGL0L05478g	6.3428e-05	0.0048487	6 / 9	6 / 548
GO:0031505	Fungal-type cell wall organization	CAGL0B04389g , CAGL0C00363g , CAGL0C02211g , CAGL0C04741g , CAGL0E02255g , CAGL0E04620g , CAGL0E05940g , CAGL0F07579g , CAGL0F07601g , CAGL0G00220g , CAGL0G00286g , CAGL0G09449g , CAGL0I06160g , CAGL0I08459g , CAGL0J04466g , CAGL0L02563g , CAGL0M03597g , CAGL0M08492g , CAGL0M08514g , CAGL0M13849g	8.1575e-05	0.0059077	20 / 80	20 / 548
GO:0045454	Cell redox homeostasis	CAGL0B00704g , CAGL0C04741g , CAGL0E00583g , CAGL0G04961g , CAGL0H05665g , CAGL0K00803g , CAGL0K06259g , CAGL0M11704g	0.00086212	0.04047	8 / 22	8 / 548
GO:1990145	Maintenance of translational fidelity	CAGL0A03234g , CAGL0F08547g , CAGL0J07678g	0.001	0.04047	3 / 3	3 / 548
GO:0051083	'de novo' cotranslational protein folding	CAGL0C05379g , CAGL0L12540g , CAGL0M07161g	0.001	0.04047	3 / 3	3 / 548
GO:0019430	Removal of superoxide radicals	CAGL0A02530g , CAGL0C04741g , CAGL0I01166g	0.001	0.04047	3 / 3	3 / 548
Cellular Component (CC)
GO:0022625	Cytosolic large ribosomal subunit	CAGL0A00979g , CAGL0A01562g , CAGL0A03168g , CAGL0A03278g , CAGL0B01203g , CAGL0D00616g , CAGL0D05214g , CAGL0E02013g , CAGL0E03938g , CAGL0F01683g , CAGL0F02937g , CAGL0G00990g , CAGL0G01078g , CAGL0G03575g , CAGL0G05940g , CAGL0G09130g , CAGL0H04521g , CAGL0H08734g , CAGL0J02354g , CAGL0J06374g , CAGL0J09086g , CAGL0J09350g , CAGL0J10164g , CAGL0K06567g , CAGL0K07414g , CAGL0K10906g , CAGL0K128…	6.2937e-24	2.8867e-21	36 / 54	36 / 548
GO:0005576	Extracellular region	CAGL0B03069g , CAGL0C00363g , CAGL0C04741g , CAGL0D00176g , CAGL0D00770g , CAGL0D01188g , CAGL0D01298g , CAGL0D01892g , CAGL0E01177g , CAGL0E06226g , CAGL0F01199g , CAGL0F04213g , CAGL0F05137g , CAGL0F09031g , CAGL0G03795g , CAGL0G07227g , CAGL0G07623g , CAGL0H00462g , CAGL0H09878g , CAGL0I00484g , CAGL0I00594g , CAGL0I04994g , CAGL0I06160g , CAGL0J06820g , CAGL0J11220g , CAGL0J11748g , CAGL0J117…	2.5243e-23	8.6837e-21	39 / 65	39 / 548
GO:0005886	Plasma membrane	CAGL0A00495g , CAGL0A01199g , CAGL0A01782g , CAGL0A01804g , CAGL0A03366g , CAGL0B03773g , CAGL0C05379g , CAGL0D02442g , CAGL0D04708g , CAGL0D06402g , CAGL0D06446g , CAGL0E01133g , CAGL0E04048g , CAGL0E04092g , CAGL0E04620g , CAGL0E06160g , CAGL0F01749g , CAGL0F02123g , CAGL0F02717g , CAGL0F03883g , CAGL0F05115g , CAGL0F08481g , CAGL0G00242g , CAGL0G00286g , CAGL0G03795g , CAGL0G05544g , CAGL0G063…	5.0534e-17	1.3907e-14	64 / 212	64 / 548
GO:0009277	Fungal-type cell wall	CAGL0A01474g , CAGL0C02211g , CAGL0D02530g , CAGL0E04620g , CAGL0E06644g , CAGL0F01287g , CAGL0F01463g , CAGL0F03883g , CAGL0F07579g , CAGL0F07601g , CAGL0G00220g , CAGL0G00286g , CAGL0G00308g , CAGL0G03795g , CAGL0G08668g , CAGL0G09383g , CAGL0G09449g , CAGL0I06160g , CAGL0I06182g , CAGL0J11748g , CAGL0K05137g , CAGL0L05434g , CAGL0M01826g , CAGL0M05599g , CAGL0M08206g , CAGL0M08492g , CAGL0M085…	3.5231e-15	8.0796e-13	31 / 64	31 / 548
GO:0022627	Cytosolic small ribosomal subunit	CAGL0A04521g , CAGL0D00858g , CAGL0D02090g , CAGL0E01991g , CAGL0F09031g , CAGL0G05027g , CAGL0G08173g , CAGL0H00462g , CAGL0J00165g , CAGL0J00737g , CAGL0J07238g , CAGL0J11220g , CAGL0K03135g , CAGL0K04587g , CAGL0K06061g , CAGL0K08382g , CAGL0K11748g , CAGL0L04840g	9.553e-12	1.8779e-9	18 / 29	18 / 548
GO:0045121	Membrane raft	CAGL0A00495g , CAGL0D01474g , CAGL0H10032g , CAGL0I10516g , CAGL0J04466g , CAGL0J08184g , CAGL0K03487g , CAGL0L01551g , CAGL0L08448g , CAGL0L12914g , CAGL0M13849g	2.5331e-8	4.3569e-06	11 / 16	11 / 548
GO:0005829	Cytosol	CAGL0A00363g , CAGL0A01540g , CAGL0A02090g , CAGL0A02112g , CAGL0A03168g , CAGL0A03234g , CAGL0A03366g , CAGL0A03542g , CAGL0A04829g , CAGL0B01100g , CAGL0B02794g , CAGL0B03069g , CAGL0B03685g , CAGL0B03839g , CAGL0B04257g , CAGL0C00275g , CAGL0C01573g , CAGL0C02189g , CAGL0C02277g , CAGL0C02453g , CAGL0C03443g , CAGL0C04301g , CAGL0C04741g , CAGL0C04983g , CAGL0C05115g , CAGL0C05137g , CAGL0C053…	8.1107e-7	0.0001116	166 / 1198	166 / 548
GO:0005840	Ribosome	CAGL0A01540g , CAGL0A02090g , CAGL0A03234g , CAGL0B04257g , CAGL0E02167g , CAGL0F03267g , CAGL0F08745g , CAGL0G02475g , CAGL0G06490g , CAGL0G07227g , CAGL0G07931g , CAGL0G09713g , CAGL0I00792g , CAGL0J01419g , CAGL0J03234g , CAGL0K00671g , CAGL0K02123g , CAGL0K04719g , CAGL0K06149g , CAGL0L12870g , CAGL0M00814g , CAGL0M11242g	5.5854e-06	0.00059119	22 / 79	22 / 548
GO:0032126	Eisosome	CAGL0I10494g , CAGL0I10516g , CAGL0J01419g , CAGL0L01551g , CAGL0L08448g , CAGL0L12914g	6.3428e-05	0.0048487	6 / 9	6 / 548
GO:0000328	Fungal-type vacuole lumen	CAGL0A01199g , CAGL0B01100g , CAGL0C00319g , CAGL0K01353g , CAGL0L03267g	0.00042884	0.023604	5 / 8	5 / 548
GO:0000324	Fungal-type vacuole	CAGL0D03498g , CAGL0F05137g , CAGL0F08261g , CAGL0G02453g , CAGL0G05808g , CAGL0G07623g , CAGL0G08954g , CAGL0J06820g , CAGL0K00803g , CAGL0K05137g , CAGL0K08536g , CAGL0M02211g , CAGL0M05599g , CAGL0M05665g , CAGL0M08734g	0.00051613	0.026304	15 / 59	15 / 548
GO:0005756	Mitochondrial proton-transporting ATP synthase, central stalk	CAGL0A01111g , CAGL0C04455g , CAGL0I04686g	0.001	0.04047	3 / 3	3 / 548
GO:0015935	Small ribosomal subunit	CAGL0F01045g , CAGL0G07931g , CAGL0H05511g	0.001	0.04047	3 / 3	3 / 548
GO:0042645	Mitochondrial nucleoid	CAGL0B03047g , CAGL0D00770g , CAGL0D06424g , CAGL0I03322g , CAGL0I07139g , CAGL0K05973g , CAGL0L06160g , CAGL0M09581g	0.0012077	0.047479	8 / 23	8 / 548
Molecular Function (MF)
GO:0003735	Structural constituent of ribosome	CAGL0A00979g , CAGL0A01540g , CAGL0A03168g , CAGL0A03278g , CAGL0A04521g , CAGL0A04697g , CAGL0B01203g , CAGL0B04257g , CAGL0D00616g , CAGL0D00858g , CAGL0D05214g , CAGL0E01991g , CAGL0E02013g , CAGL0F01045g , CAGL0F01683g , CAGL0F02937g , CAGL0F09031g , CAGL0G00990g , CAGL0G01078g , CAGL0G01881g , CAGL0G02277g , CAGL0G02475g , CAGL0G03575g , CAGL0G04675g , CAGL0G05027g , CAGL0G05940g , CAGL0G064…	2.4055e-33	3.3099e-30	74 / 160	74 / 548
GO:0008559	Xenobiotic-transporting ATPase activity	CAGL0F02717g , CAGL0G00242g , CAGL0I04862g , CAGL0M01760g	9.967e-05	0.0068573	4 / 4	4 / 548
GO:0051287	NAD binding	CAGL0C05137g , CAGL0E01133g , CAGL0G09383g , CAGL0H03795g , CAGL0J00451g , CAGL0M12837g , CAGL0M13277g	0.00030567	0.019118	7 / 15	7 / 548
GO:0005199	Structural constituent of cell wall	CAGL0F07579g , CAGL0F07601g , CAGL0I06160g , CAGL0I06182g , CAGL0J01463g , CAGL0M08492g , CAGL0M08514g	0.00030567	0.019118	7 / 15	7 / 548
GO:0051082	Unfolded protein binding	CAGL0C02849g , CAGL0C05379g , CAGL0D02948g , CAGL0F06693g , CAGL0G03289g , CAGL0G03795g , CAGL0G07529g , CAGL0H06127g , CAGL0H08283g , CAGL0I01496g , CAGL0I03322g , CAGL0K05973g , CAGL0K06259g , CAGL0L00495g , CAGL0L12540g , CAGL0M07161g	0.00034298	0.020519	16 / 63	16 / 548
GO:0000287	Magnesium ion binding	CAGL0C05511g , CAGL0E05610g , CAGL0E06138g , CAGL0F08261g , CAGL0G08085g , CAGL0H03795g , CAGL0H09878g , CAGL0I02486g , CAGL0L00759g , CAGL0L11814g , CAGL0M07920g , CAGL0M12034g	0.000364	0.020869	12 / 40	12 / 548
GO:0046933	Proton-transporting ATP synthase activity, rotational mechanism	CAGL0A01111g , CAGL0C04455g , CAGL0H00506g , CAGL0H01397g , CAGL0H04191g , CAGL0I04686g , CAGL0M09581g	0.00049688	0.026296	7 / 16	7 / 548
GO:0051087	Chaperone binding	CAGL0E04906g , CAGL0H01705g , CAGL0H08283g , CAGL0J02442g , CAGL0K05973g , CAGL0K11572g , CAGL0L00495g	0.00077247	0.037962	7 / 17	7 / 548
GO:0042124	1,3-beta-glucanosyltransferase activity	CAGL0F01287g , CAGL0G00220g , CAGL0G00286g , CAGL0M13849g	0.0012669	0.048423	4 / 6	4 / 548

## Sheet: Table S10.1
Table S10: Comparative analysis of identified and predicted secretome of C. glabrata.
Table S10.1: Comparative analysis of identified and predicted secretome of wild-type.
wild-type secretome
Sr.No.	CAGL ID	Common/Sc name	Lum and Min, 2011	Choi et al., 2010
				SP	NS	SP3	SL
1	CAGL0D02530g	EGT2	Yes			Yes
2	CAGL0J11770g	PLB1	Yes			Yes
3	CAGL0M04191g	YPS1	Yes			Yes
4	CAGL0G00220g	BGL2	Yes	Yes
5	CAGL0I06160g	CIS3	Yes	Yes
6	CAGL0M09779g	CTS1	Yes	Yes
7	CAGL0J01463g	CWP1	Yes	Yes
8	CAGL0F07579g	CWP1	Yes	Yes
9	CAGL0F07601g	CWP2	Yes	Yes
10	CAGL0L01727g	DCW1	Yes	Yes
11	CAGL0M01826g	ECM33	Yes	Yes
12	CAGL0I00484g	EXG1	Yes	Yes
13	CAGL0F03883g	GAS3	Yes	Yes
14	CAGL0F01287g	GAS5	Yes	Yes
15	CAGL0I06182g	HSP150	Yes	Yes
16	CAGL0D02948g	KAR2	Yes	Yes
17	CAGL0C00363g	KRE9	Yes	Yes
18	CAGL0M03597g	MID1	Yes	Yes
19	CAGL0L05434g	NCA3	Yes	Yes
20	CAGL0A01870g	PEP1	Yes	Yes
21	CAGL0M08492g	PIR1	Yes	Yes
22	CAGL0M08514g	PIR3	Yes	Yes
23	CAGL0I06204g	PIR5	Yes	Yes
24	CAGL0J11748g	PLB2	Yes	Yes
25	CAGL0G07667g	PRY1	Yes	Yes
26	CAGL0E04620g	PST1	Yes	Yes
27	CAGL0M13805g	SCW10	Yes	Yes
28	CAGL0E02915g	SCW11	Yes	Yes
29	CAGL0A01474g	SCW11	Yes	Yes
30	CAGL0G00308g	SCW4	Yes	Yes
31	CAGL0G08668g	SIM1	Yes	Yes
32	CAGL0G09515g	SPR1	Yes	Yes
33	CAGL0J09922g	SUN4	Yes	Yes
34	CAGL0F01463g	TIR2	Yes	Yes
35	CAGL0M05599g	TOS1	Yes	Yes
36	CAGL0L03289g	UTH1	Yes	Yes
37	CAGL0J06050g	YGP1	Yes	Yes
38	CAGL0E01727g	YPS3	Yes				Yes
39	CAGL0F06413g	FET3				Yes
40	CAGL0C00110g	FLO1				Yes
41	CAGL0C04741g	SOD1				Yes
42	CAGL0K00803g	TRX1				Yes
43	CAGL0E01859g	YPS10				Yes
44	CAGL0E01793g	YPS6				Yes
45	CAGL0K04125g	ACB1			Yes
46	CAGL0K12694g	ACT1			Yes
47	CAGL0K05137g	ATH1			Yes
48	CAGL0I01408g	CYC1			Yes
49	CAGL0C04411g	HTA2			Yes
50	CAGL0C04389g	HTB2			Yes
51	CAGL0M04983g	MBF1			Yes
52	CAGL0L07722g	PGK1			Yes
53	CAGL0K07546g	PMU1			Yes
54	CAGL0K11858g	PST2			Yes
55	CAGL0L12144g	RAX2			Yes
56	CAGL0M10241g	RPL14A			Yes
57	CAGL0G03575g	RPL23B			Yes
58	CAGL0D05214g	RPL29			Yes
59	CAGL0J09086g	RPL35B			Yes
60	CAGL0A00979g	RPL38			Yes
61	CAGL0H08734g	RPL43A			Yes
62	CAGL0K06149g	RPS17B			Yes
63	CAGL0E01991g	RPS19A			Yes
64	CAGL0J03234g	RPS24A			Yes
65	CAGL0D00858g	RPS29B			Yes
66	CAGL0G09713g	RPS30B			Yes
67	CAGL0G08173g	RPS31			Yes
68	CAGL0I09394g	SDH8			Yes
69	CAGL0J00451g	TDH3			Yes
70	CAGL0G09383g	TDH3			Yes
71	CAGL0H06127g	TIM9			Yes
72	CAGL0C02453g	YPT31			Yes
73	CAGL0E02255g	ZEO1			Yes
74	CAGL0M04543g				Yes
75	CAGL0L08294g	AXL2		Yes
76	CAGL0H01529g	CPR5		Yes
77	CAGL0G09449g	CRH1		Yes
78	CAGL0M05049g	DFG5		Yes
79	CAGL0E04664g	EMC10		Yes
80	CAGL0M08756g	EXG2		Yes
81	CAGL0M13849g	GAS2		Yes
82	CAGL0F03003g	HKR1		Yes
83	CAGL0F08833g	MSB2		Yes
84	CAGL0K01353g	NPC2		Yes
85	CAGL0M08206g	TOH1		Yes
86	CAGL0C02211g	UTR2		Yes
87	CAGL0G07887g	VOA1		Yes
88	CAGL0E01771g	YPS5		Yes
89	CAGL0A02431g	YPS7		Yes
90	CAGL0E01837g	YPS9		Yes

[truncated: 24 more sheets: Table S10.2, Table S11, Table S12.1, Table S12.2, Table S12.3, Table S13.1, Table S13.2, Table S14, Table S15, Table S16, Table S17, Table S18, Table S19, Table S20, Table S21.1, Table 21.2, Table 22.1, Table 22.2, Table S23, Table S24 …]
